# Supplementary material for: Total synthesis of lamellarin G trimethyl ether through enaminone cyclocondensation
Source: Royal Society of Chemistry journal article supplement (doi:10.1039/d3ob00870c), 2023-01-01
Supplement: d3ob00870c1.pdf [file d3ob00870c1.pdf]

## SUPPORTING INFORMATION

### Total Synthesis of Lamellarin G Trimethyl Ether through Enaminone Cyclocondensation

Urtė Šachlevičiūtė,<sup>a,b</sup> Neringa Kleizienė,<sup>a</sup> Aurimas Bieliauskas,<sup>a</sup> Algirdas Šačkus,<sup>\*a</sup> and Till Opatz<sup>\*b</sup>

<sup>a</sup> Institute of Synthetic Chemistry, Kaunas University of Technology, K. Baršausko g. 59, LT-51423 Kaunas, Lithuania

<sup>b</sup> Department of Chemistry, Johannes Gutenberg University Mainz, Duesbergweg 10-14, 55128 Mainz, Germany

\* Corresponding Authors

E-mail: algirdas.sackus@ktu.lt, opatz@uni-mainz.de.

| <b>Contents</b> | <b>page</b> |
|-----------------|-------------|
| NMR spectra     | S2          |

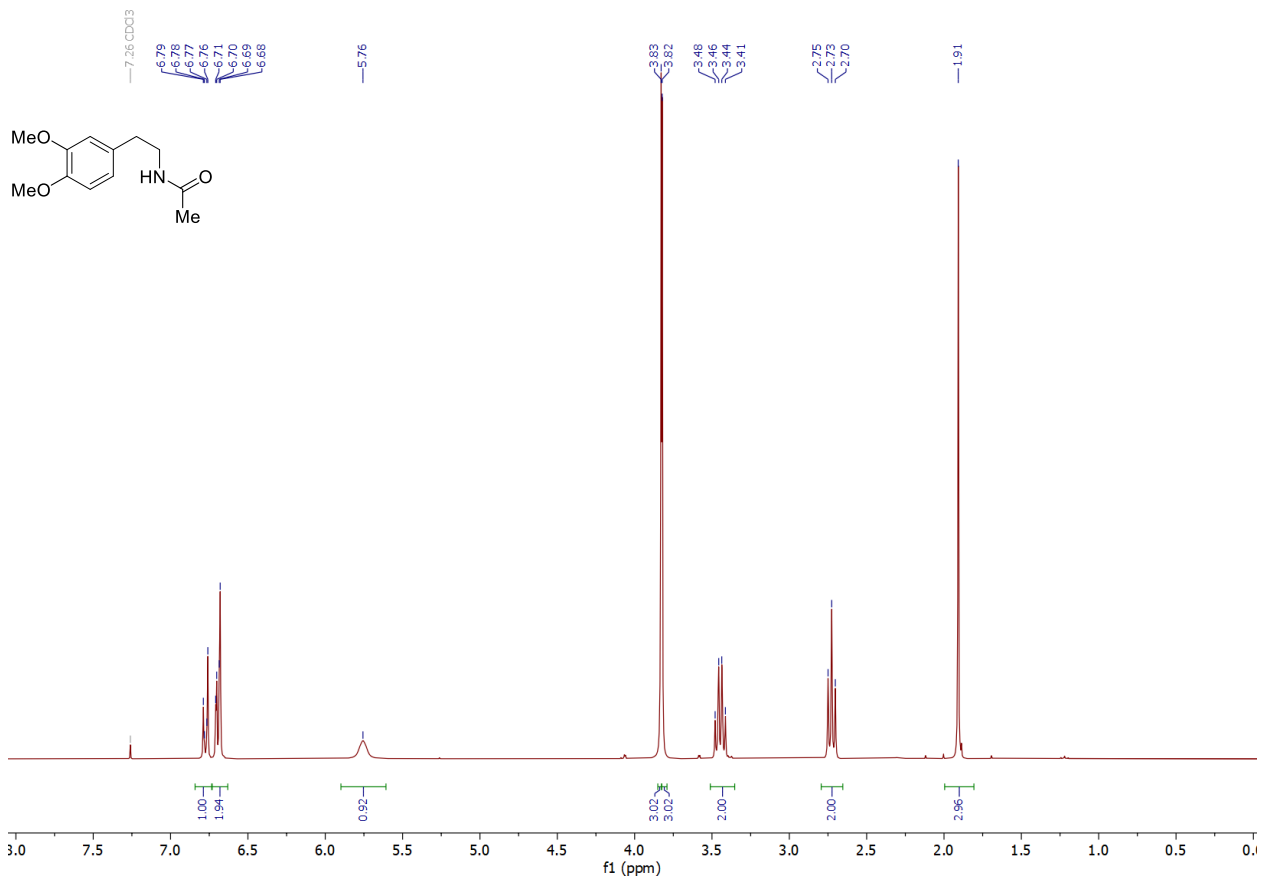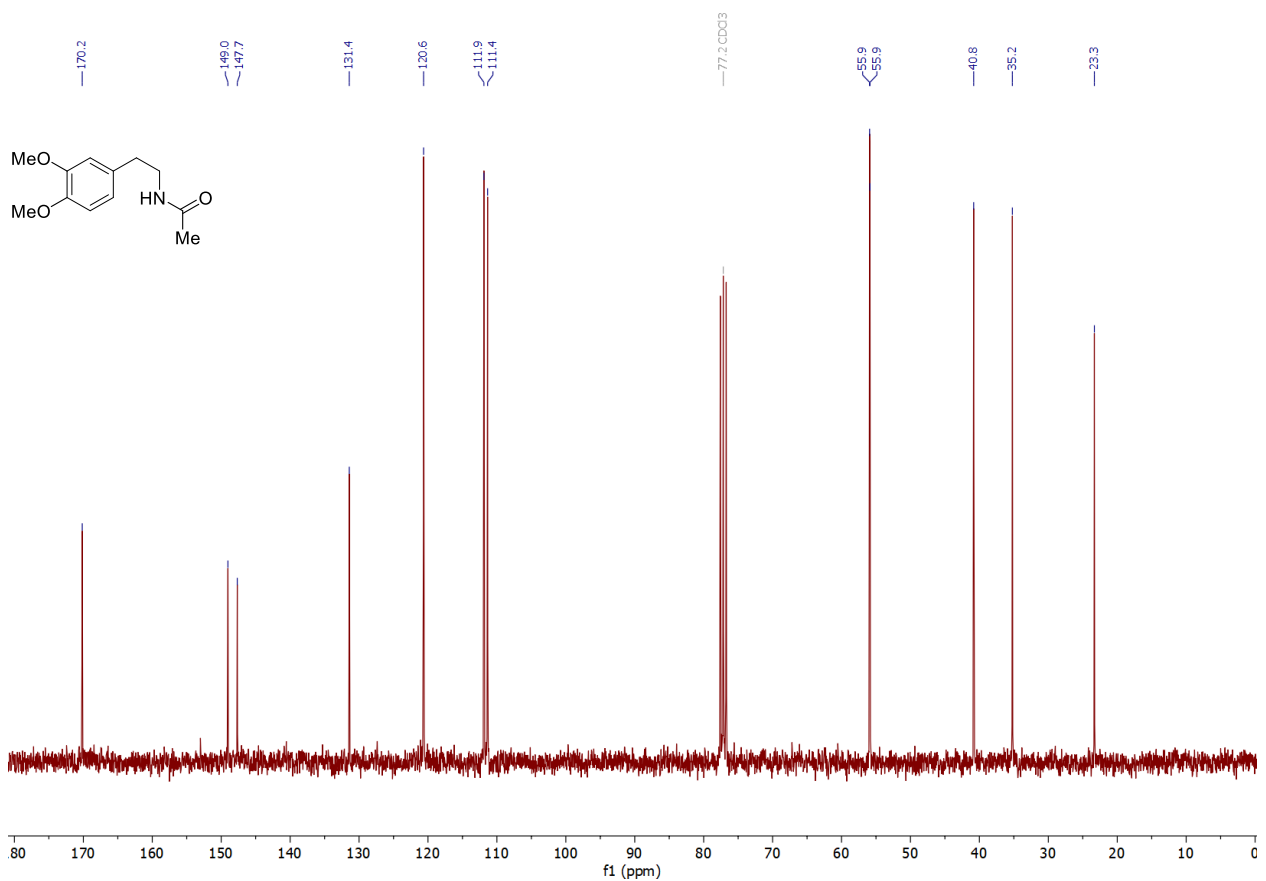

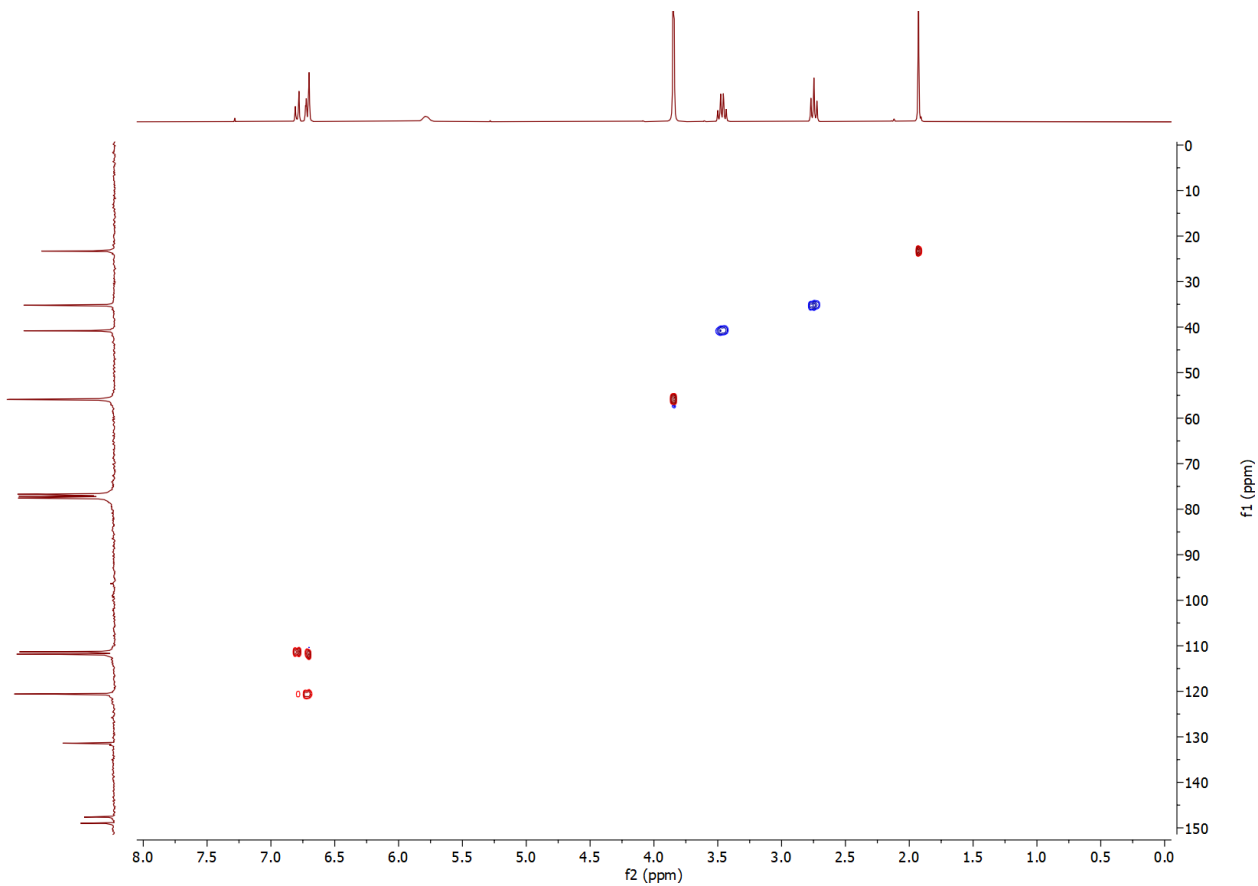

$^1\text{H}$ - $^{13}\text{C}$  HSQC spectrum of intermediate *N*-[2-(3,4-dimethoxyphenyl)ethyl]acetamide

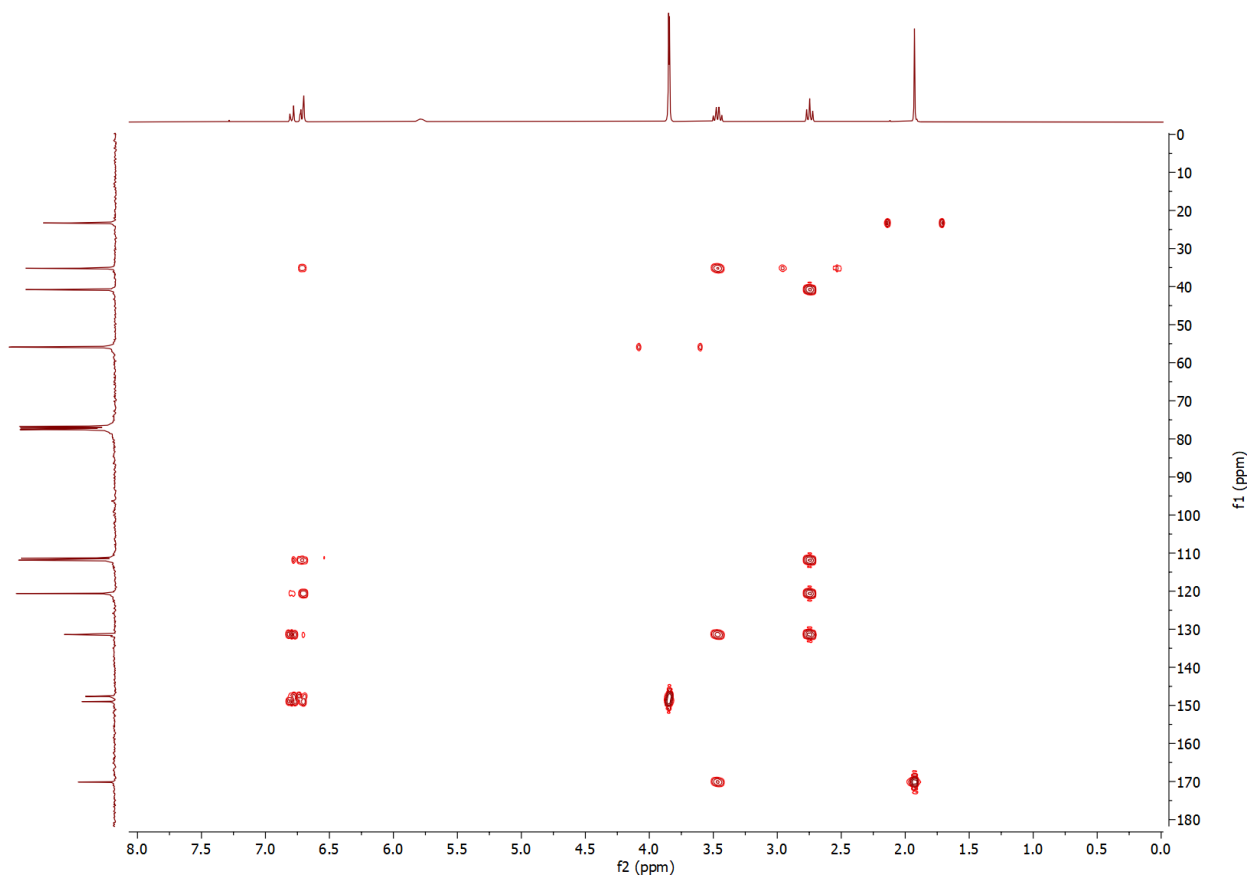

$^1\text{H}$ - $^{13}\text{C}$  HMBC spectrum of intermediate *N*-[2-(3,4-dimethoxyphenyl)ethyl]acetamide

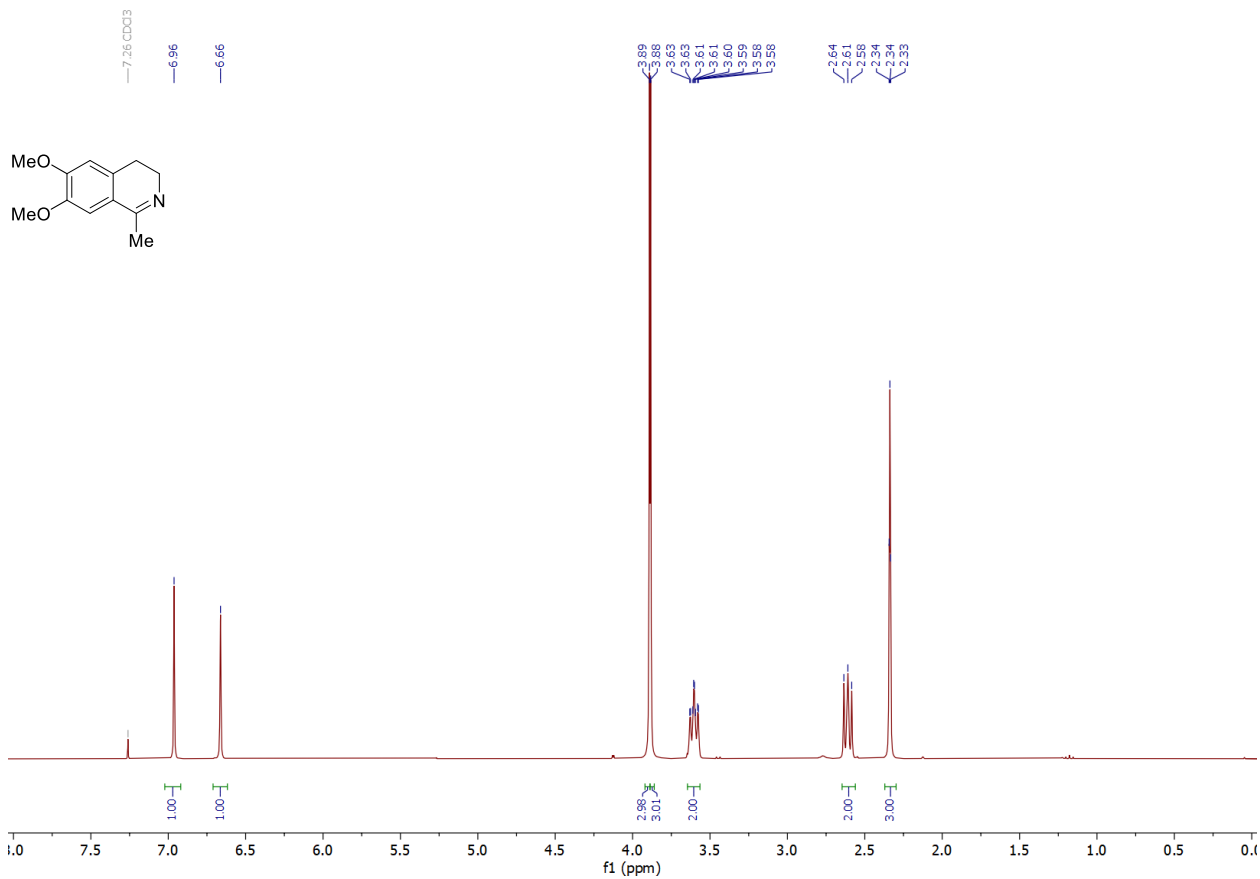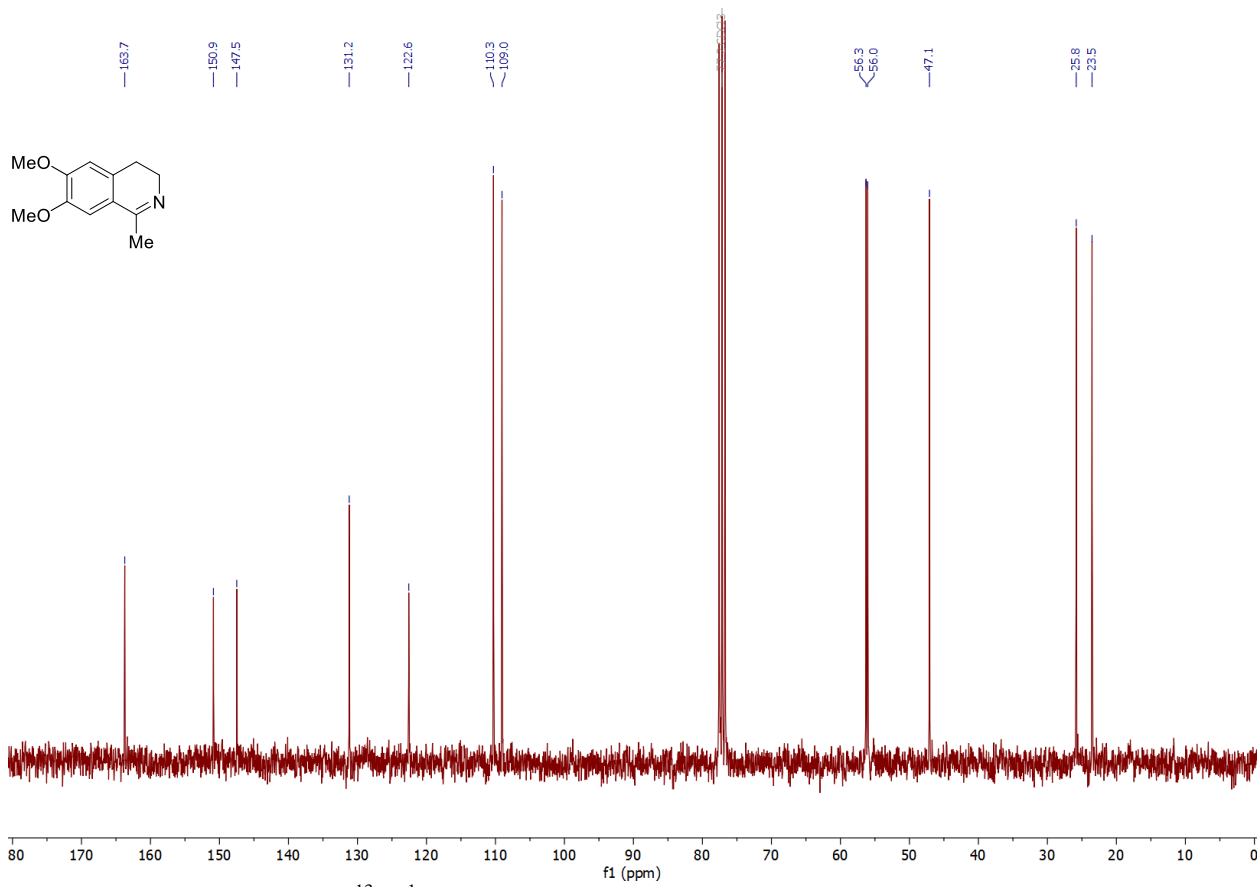

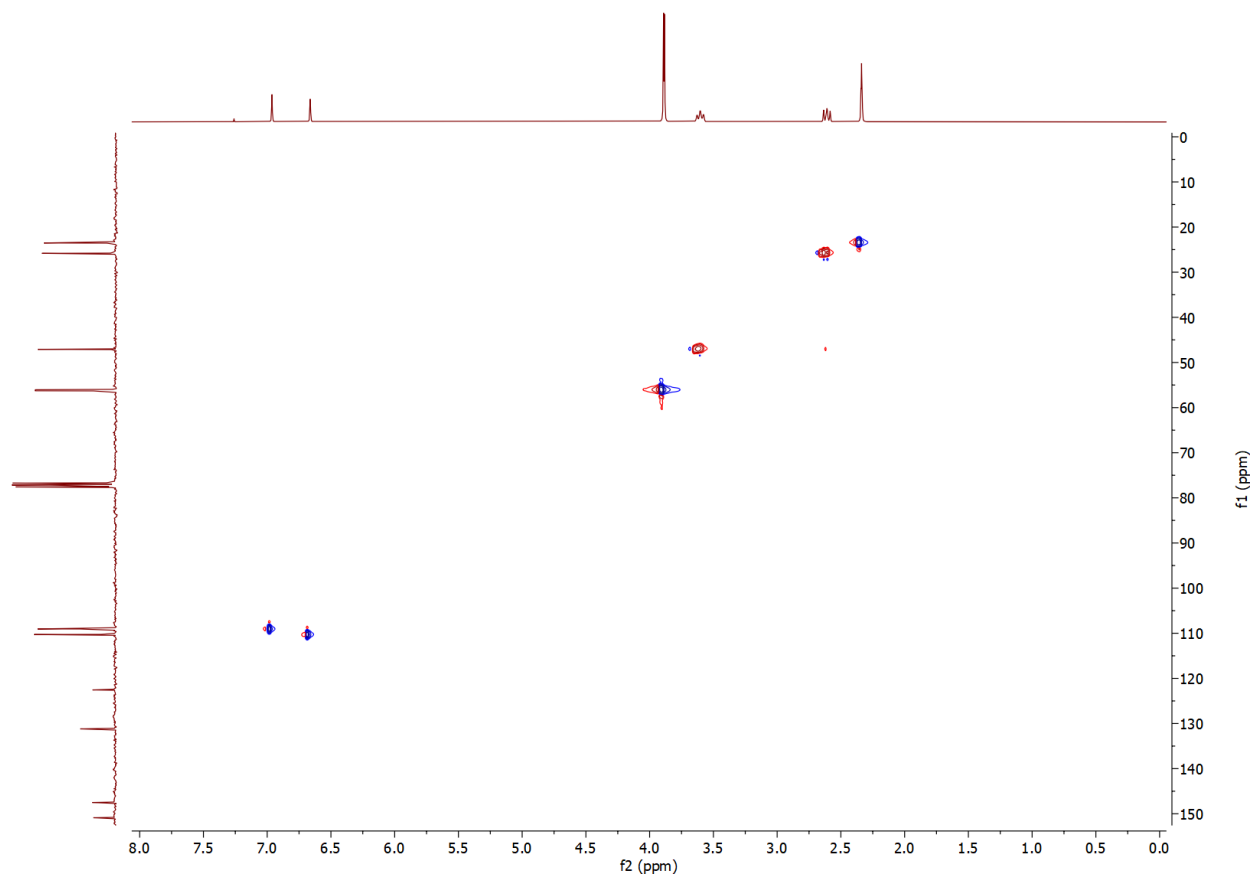

$^1\text{H}$ - $^{13}\text{C}$  HSQC spectrum of **2**

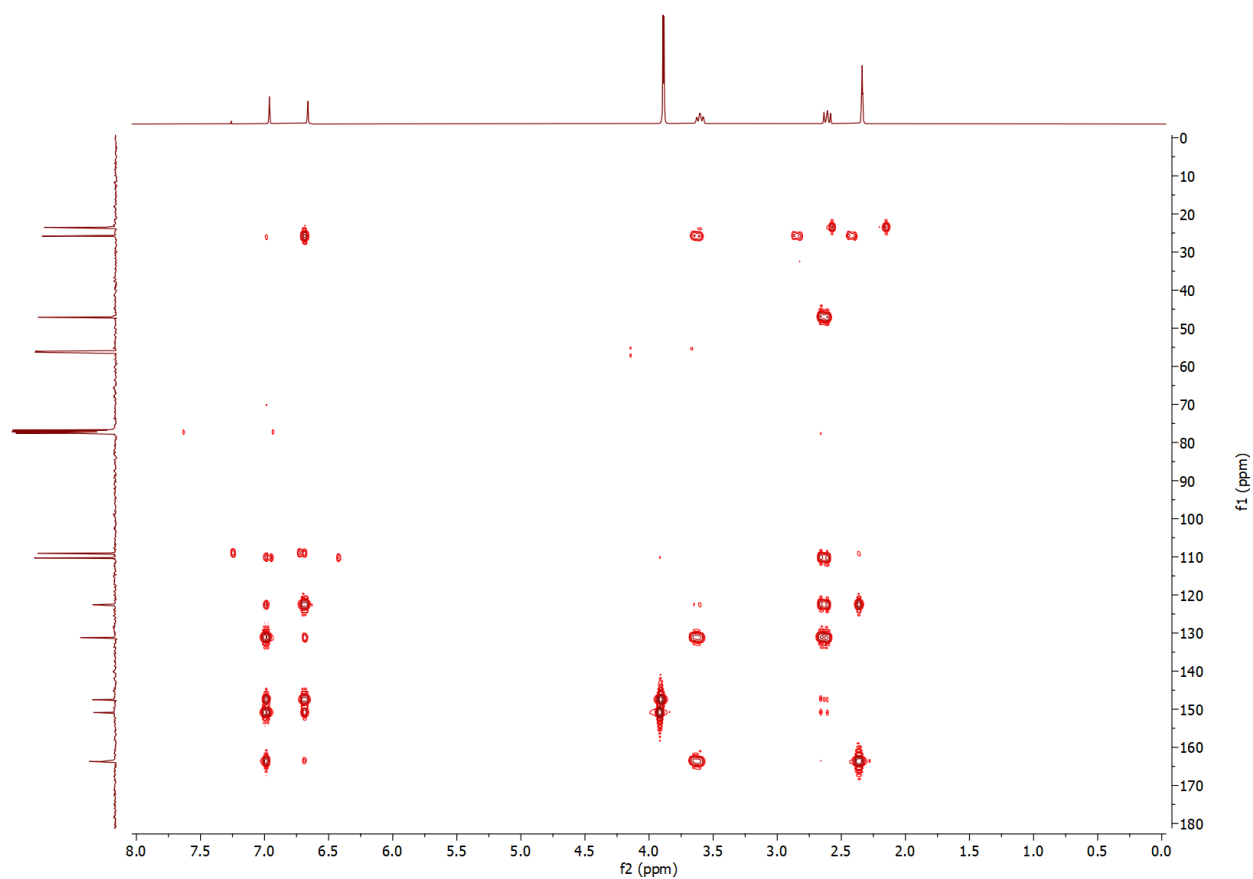

$^1\text{H}$ - $^{13}\text{C}$  HMBC spectrum of **2**

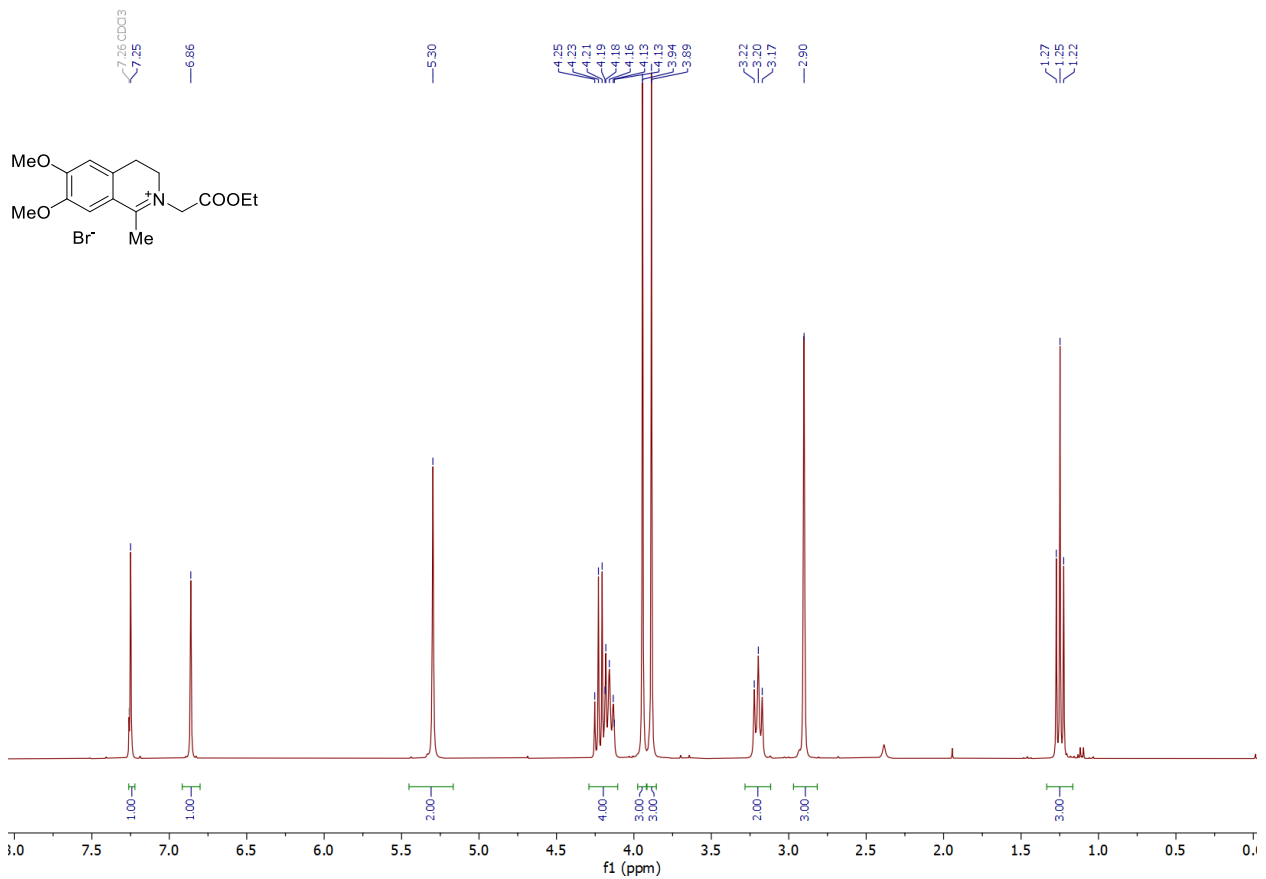

<sup>1</sup>H NMR (300 MHz, CDCl<sub>3</sub>) spectrum of **3**

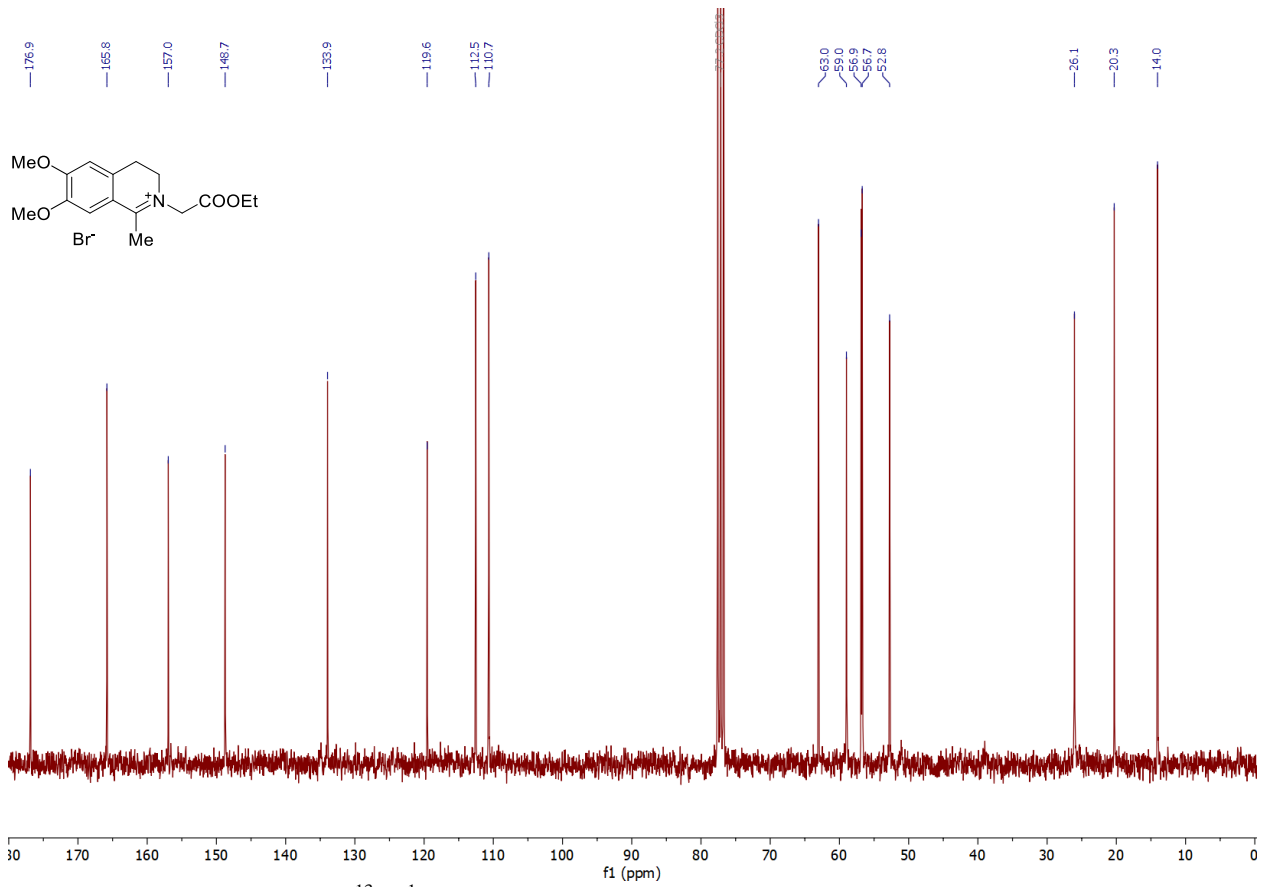

<sup>13</sup>C{<sup>1</sup>H} NMR (75 MHz, CDCl<sub>3</sub>) spectrum of **3**

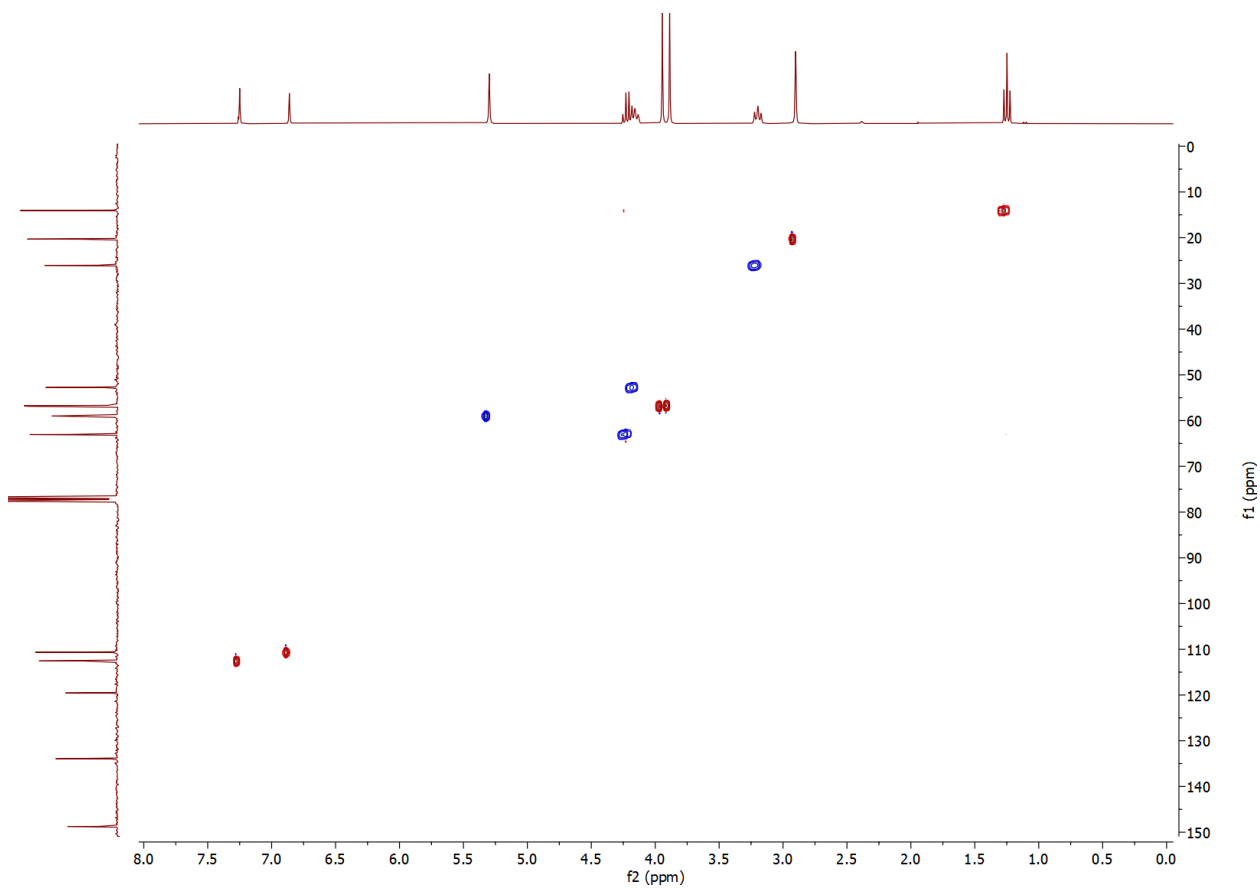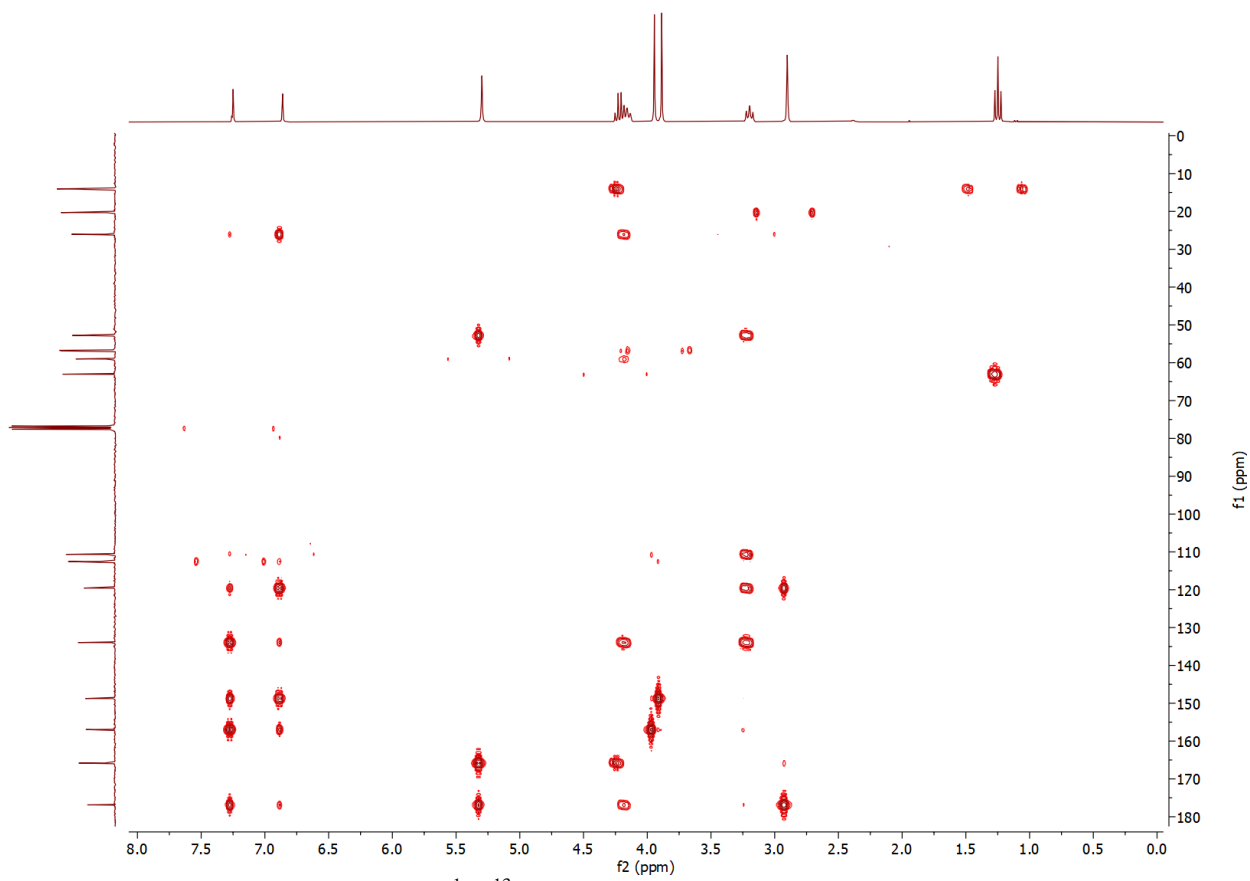

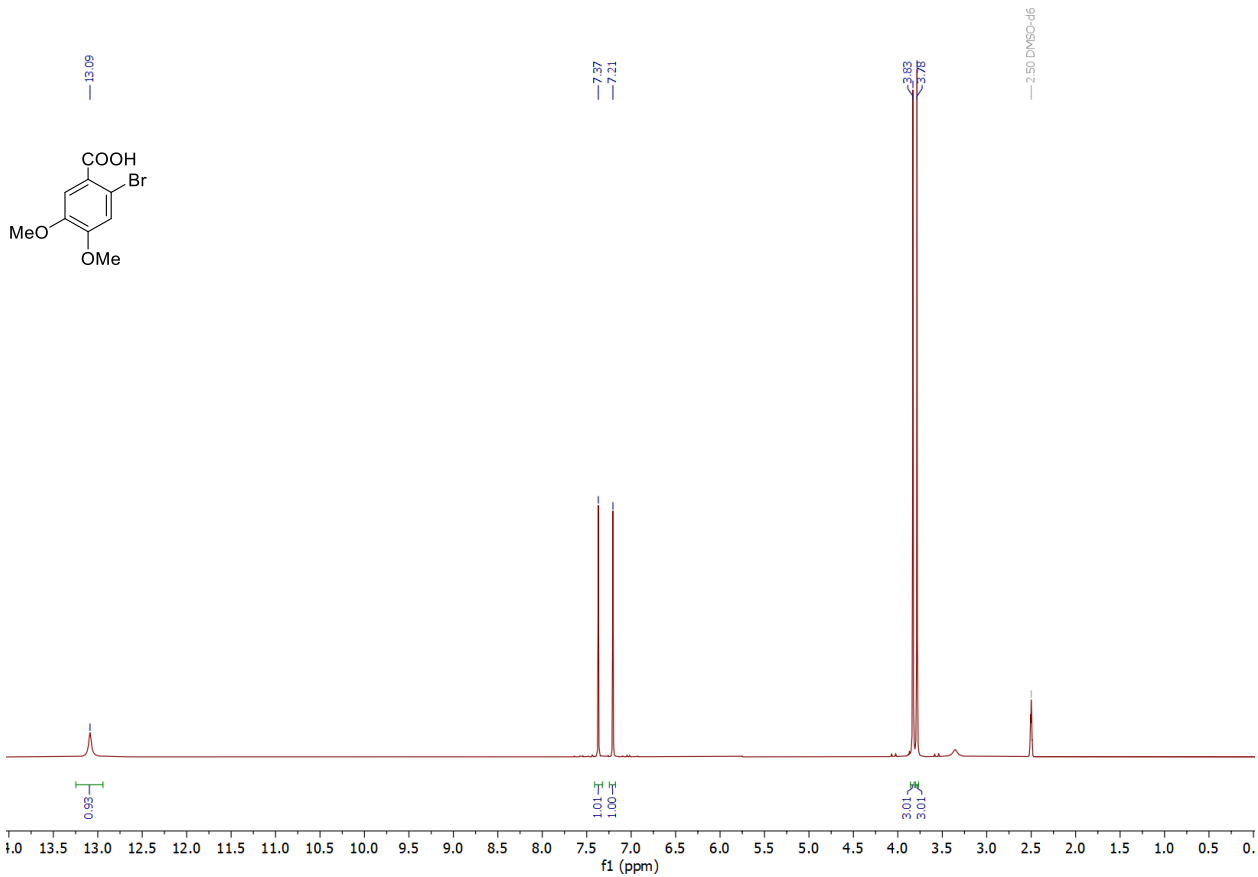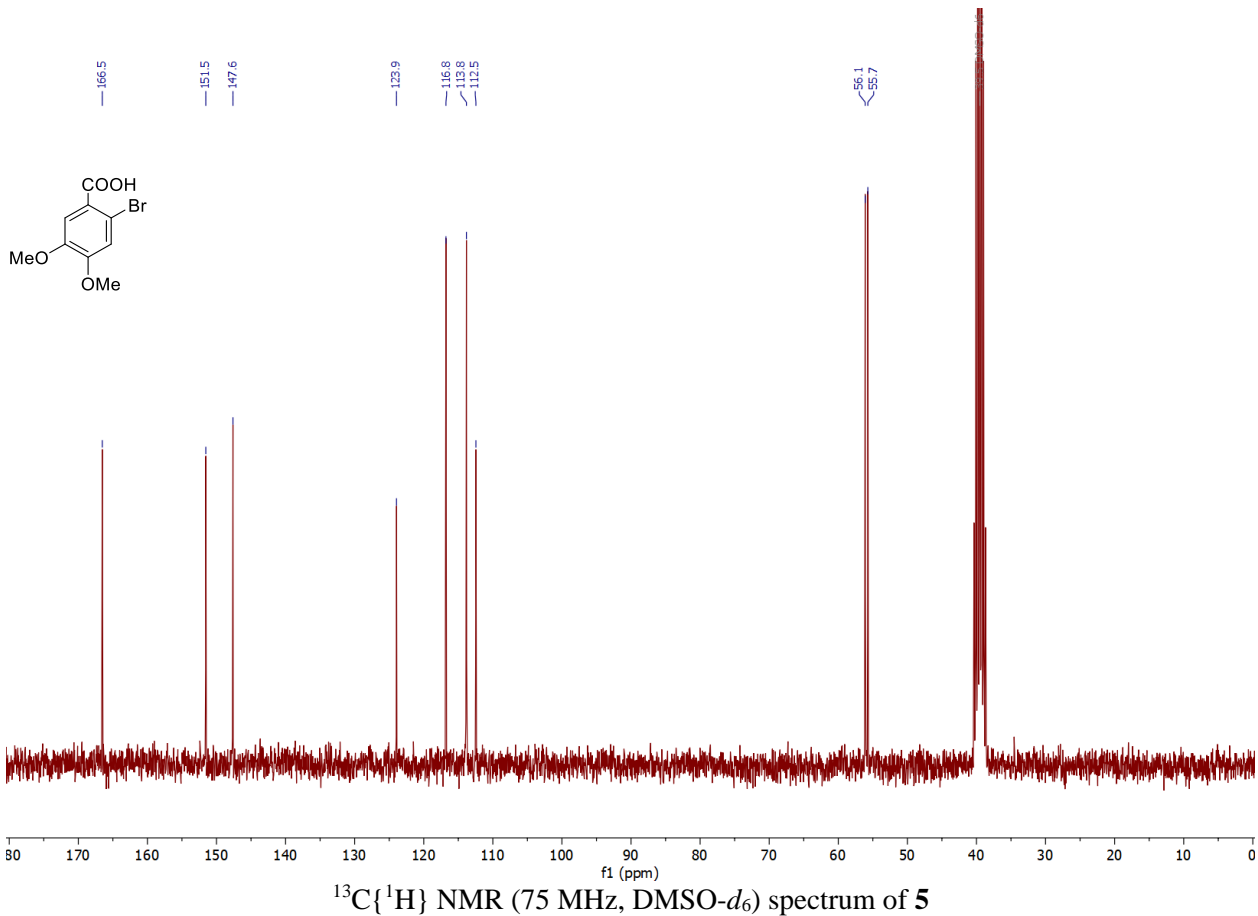



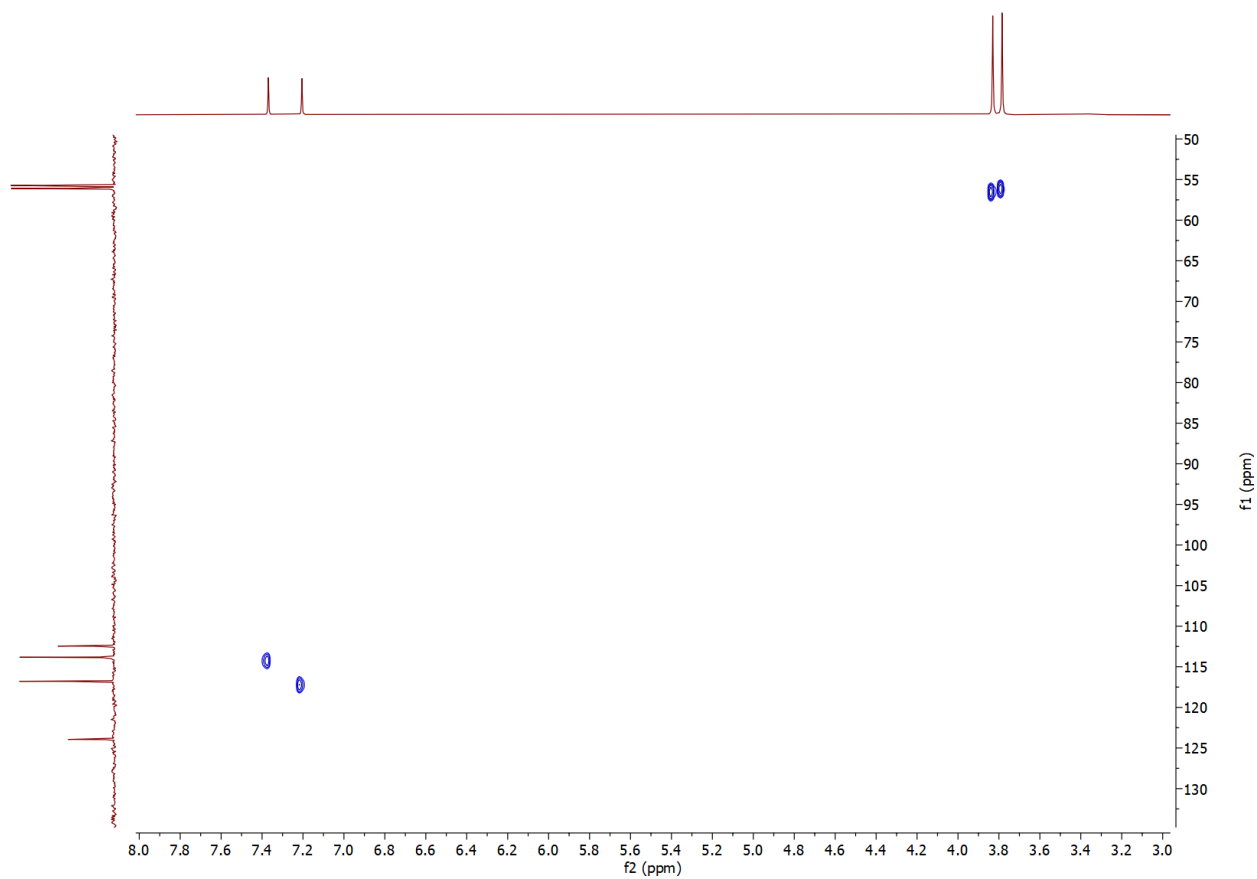

$^1\text{H}$ - $^{13}\text{C}$  HSQC spectrum of **5**

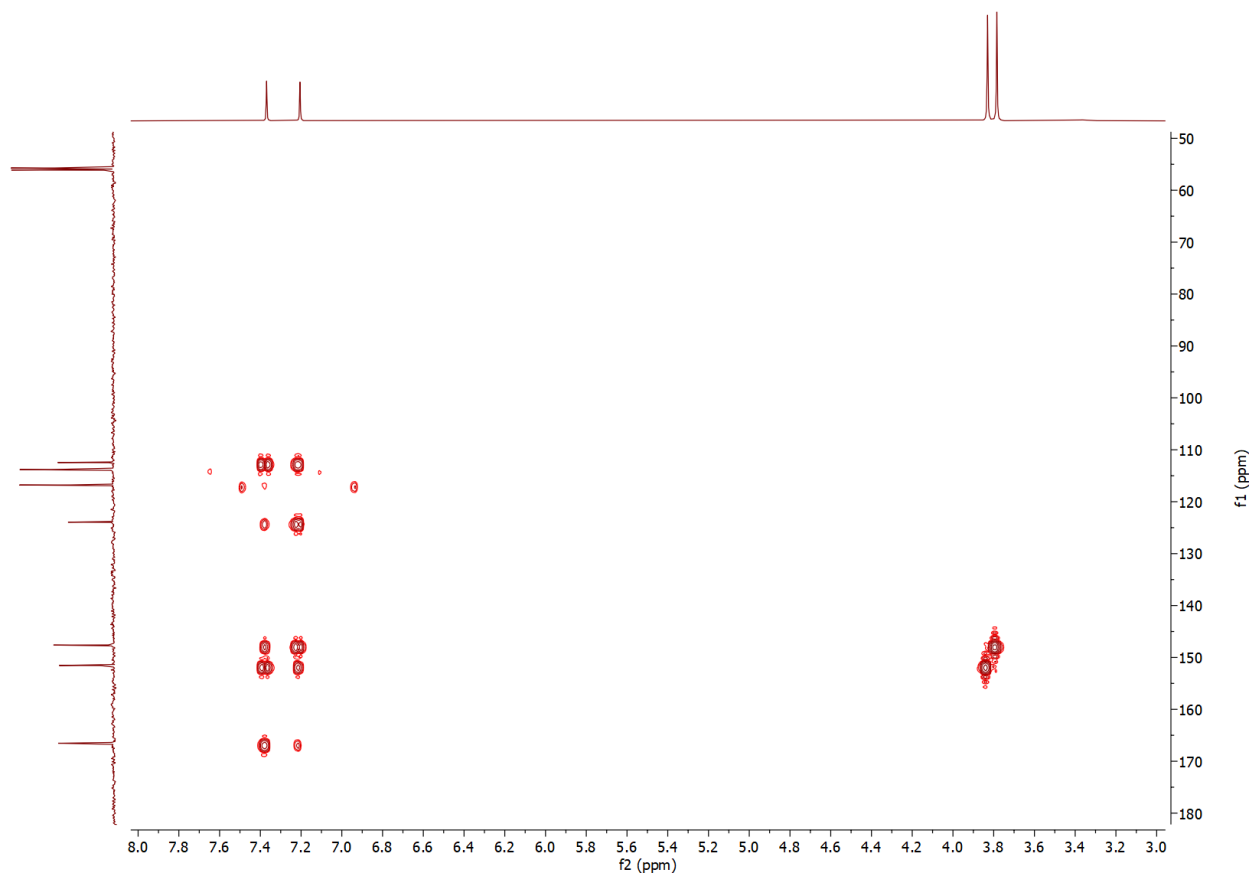

$^1\text{H}$ - $^{13}\text{C}$  HMBC spectrum of **5**

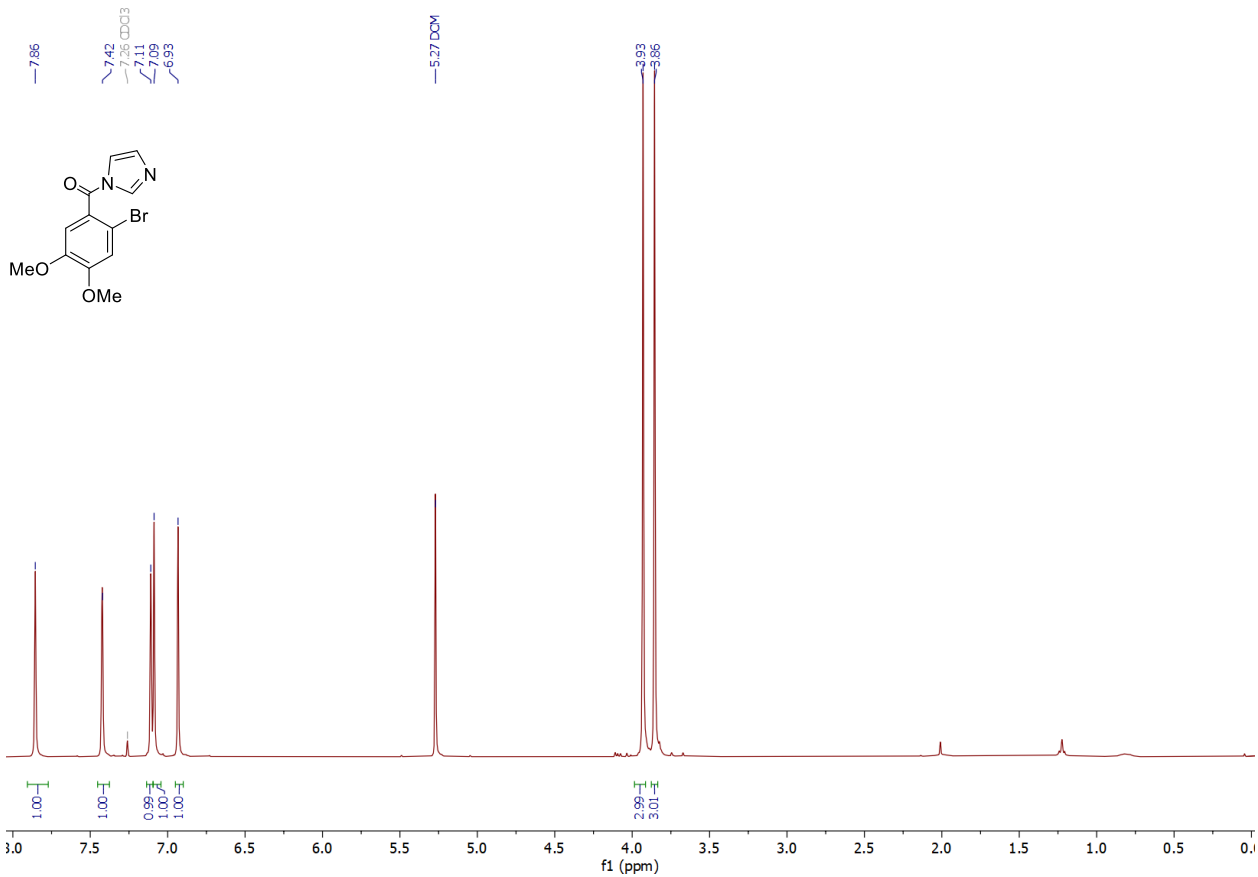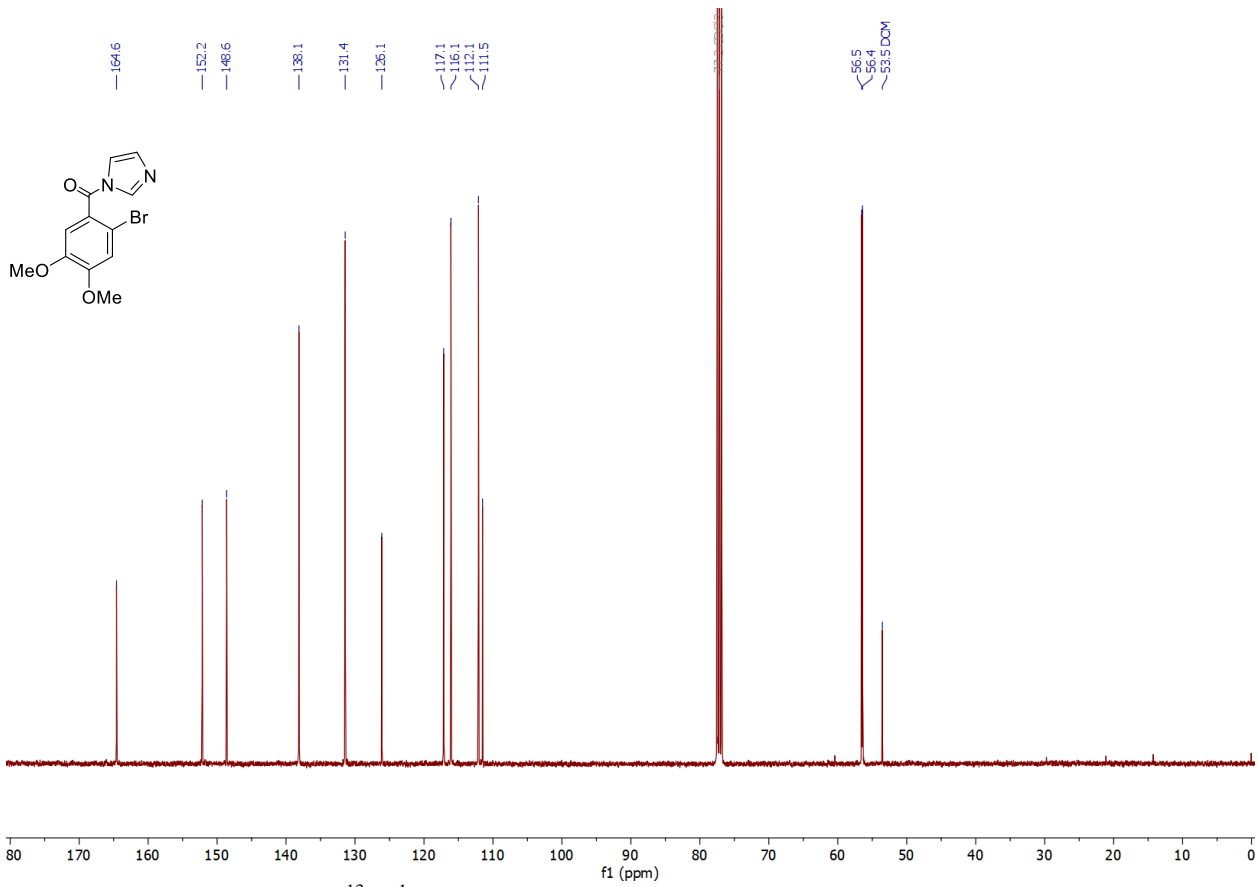

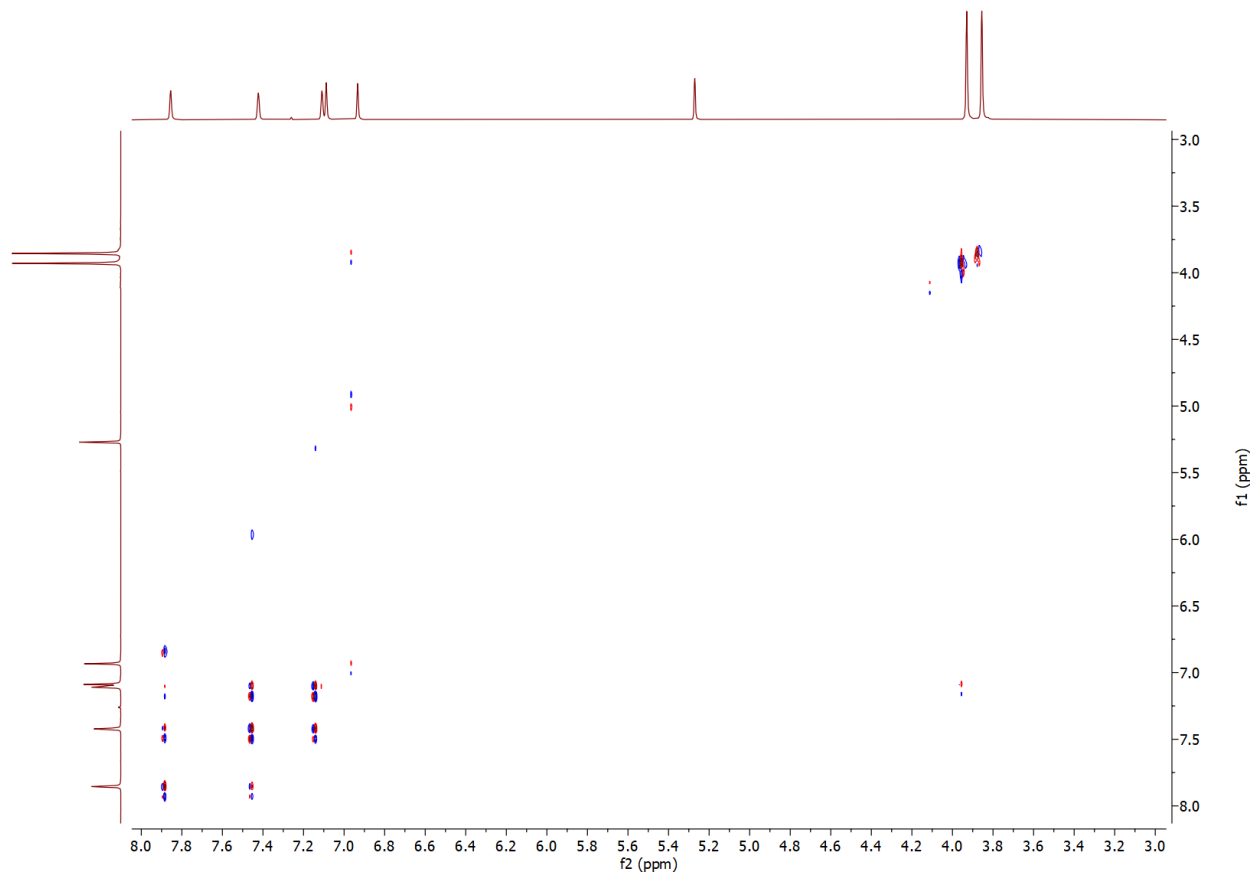

$^1\text{H}$ - $^1\text{H}$  COSY spectrum of **7**

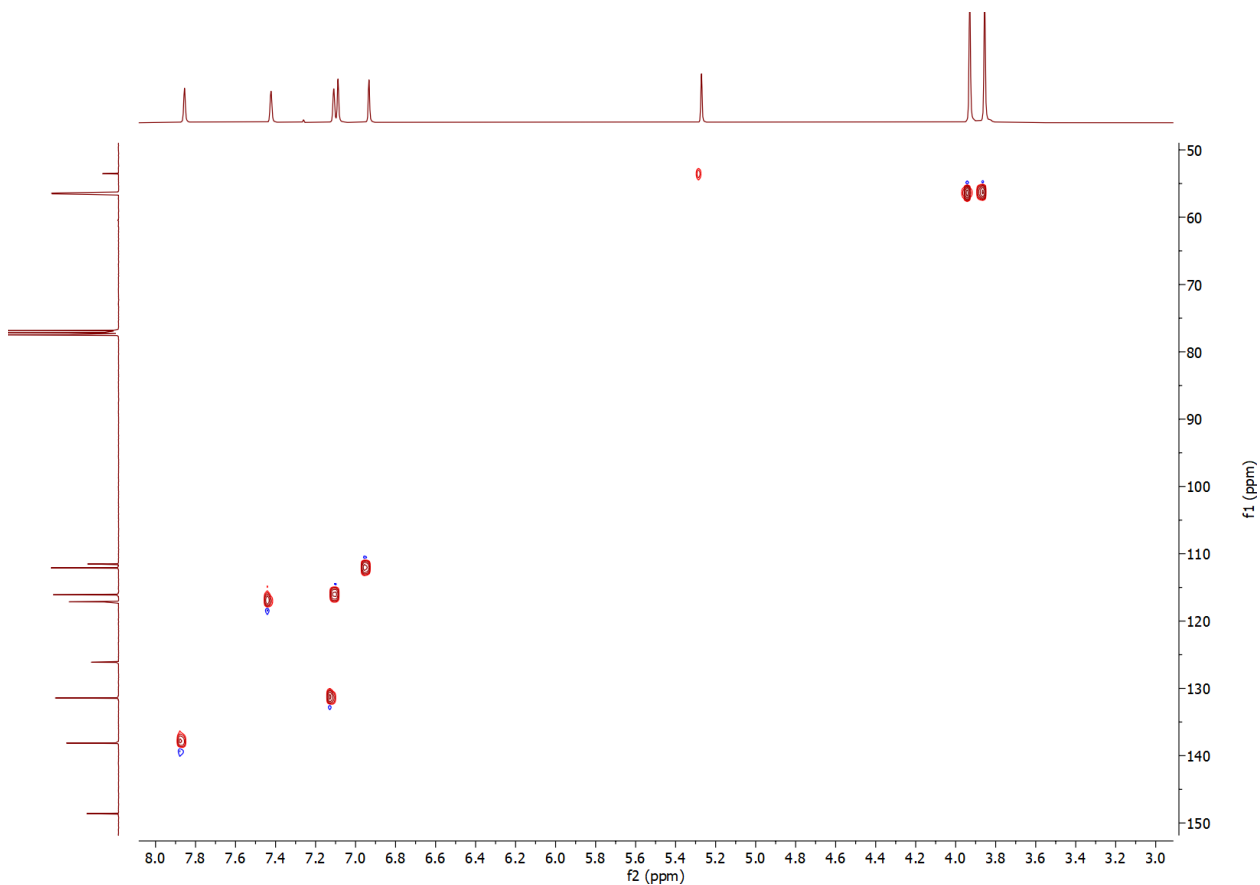

$^1\text{H}$ - $^{13}\text{C}$  HSQC spectrum of **7**

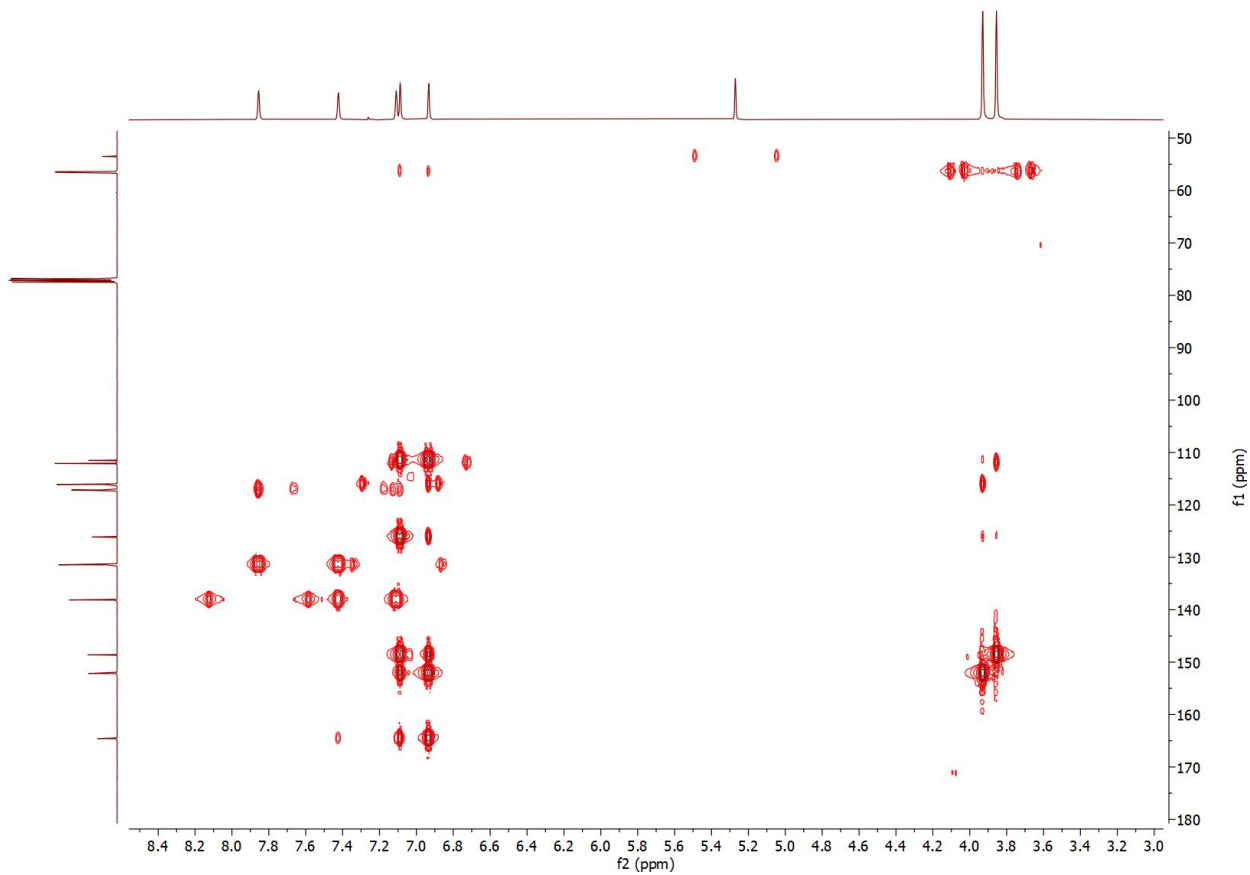

$^1\text{H}$ - $^{13}\text{C}$  HMBC spectrum of **7**

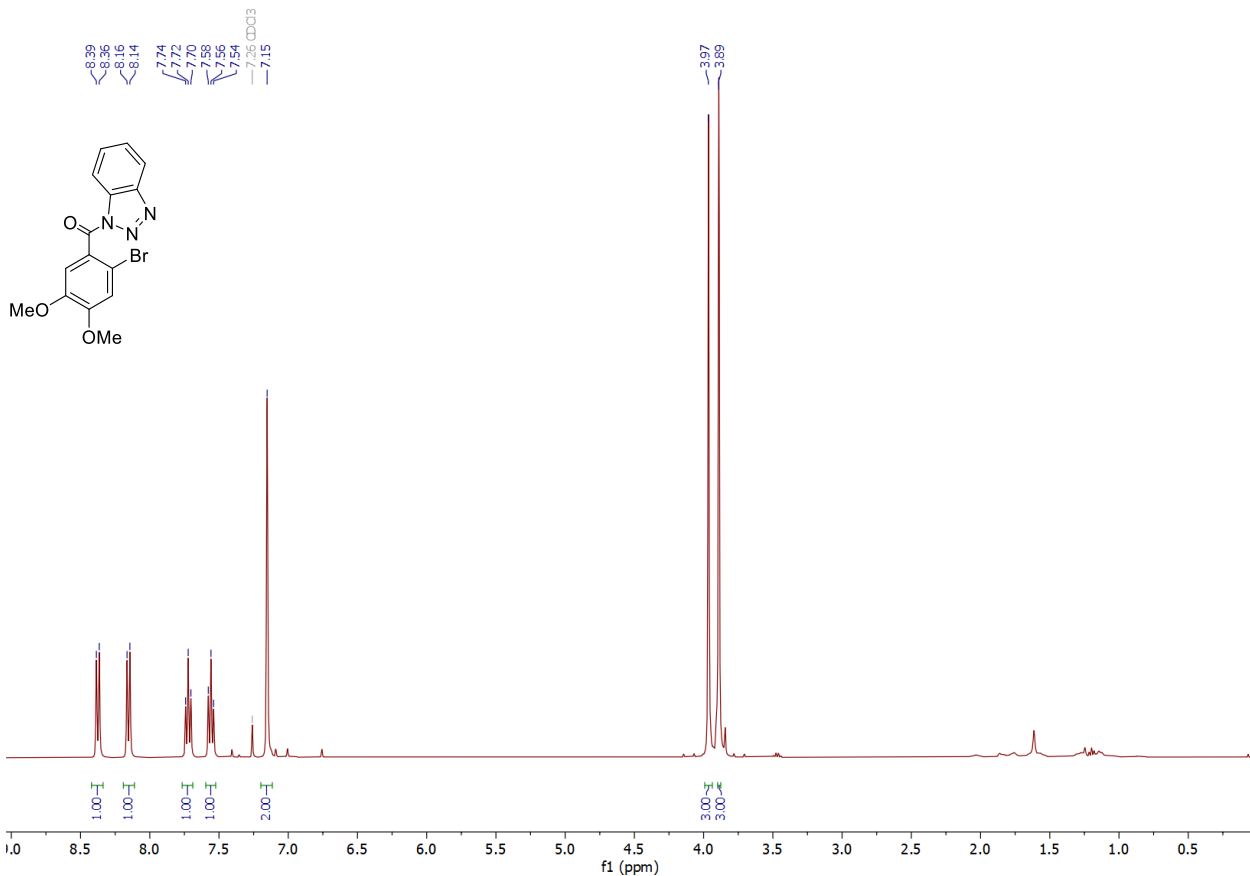

$^1\text{H}$  NMR (400 MHz,  $\text{CDCl}_3$ ) spectrum of **8**

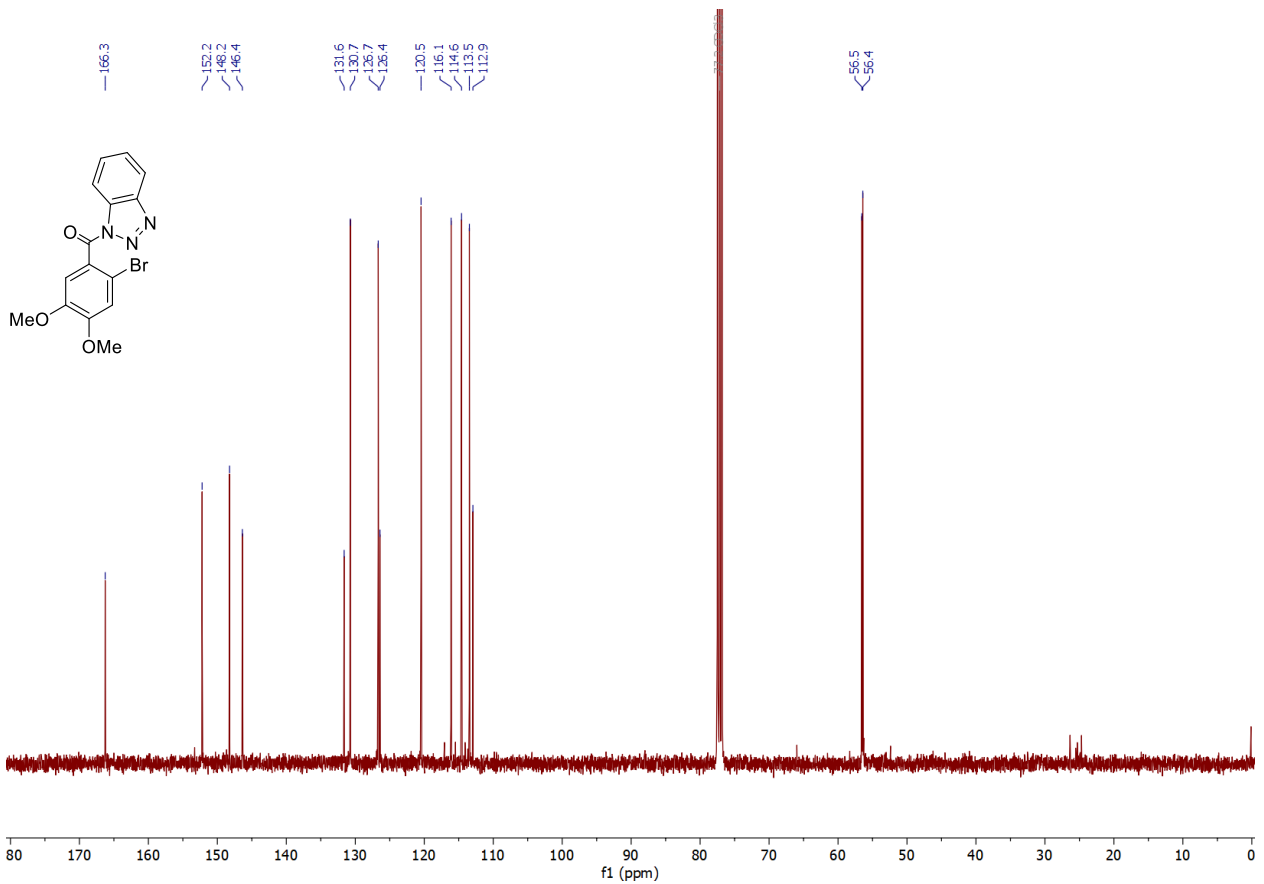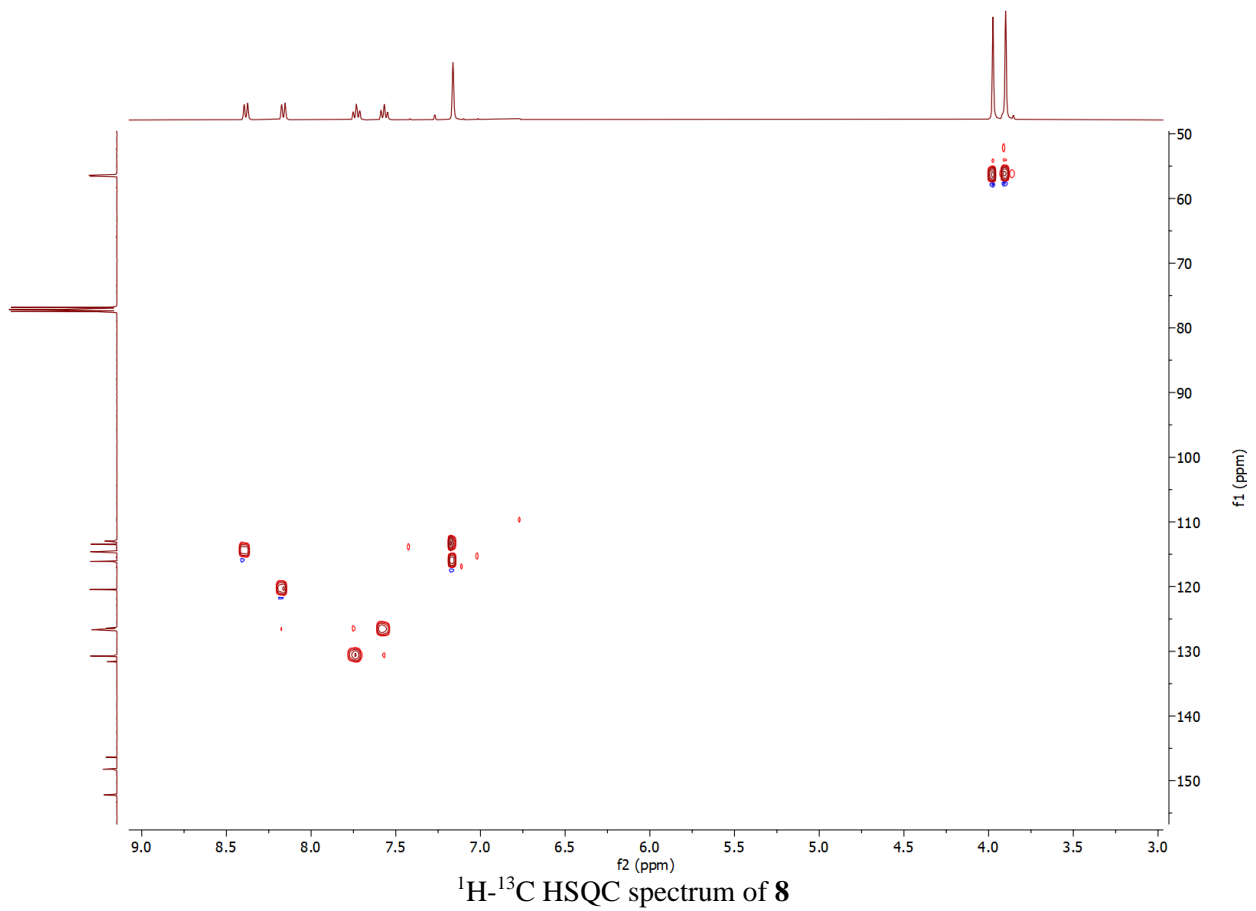

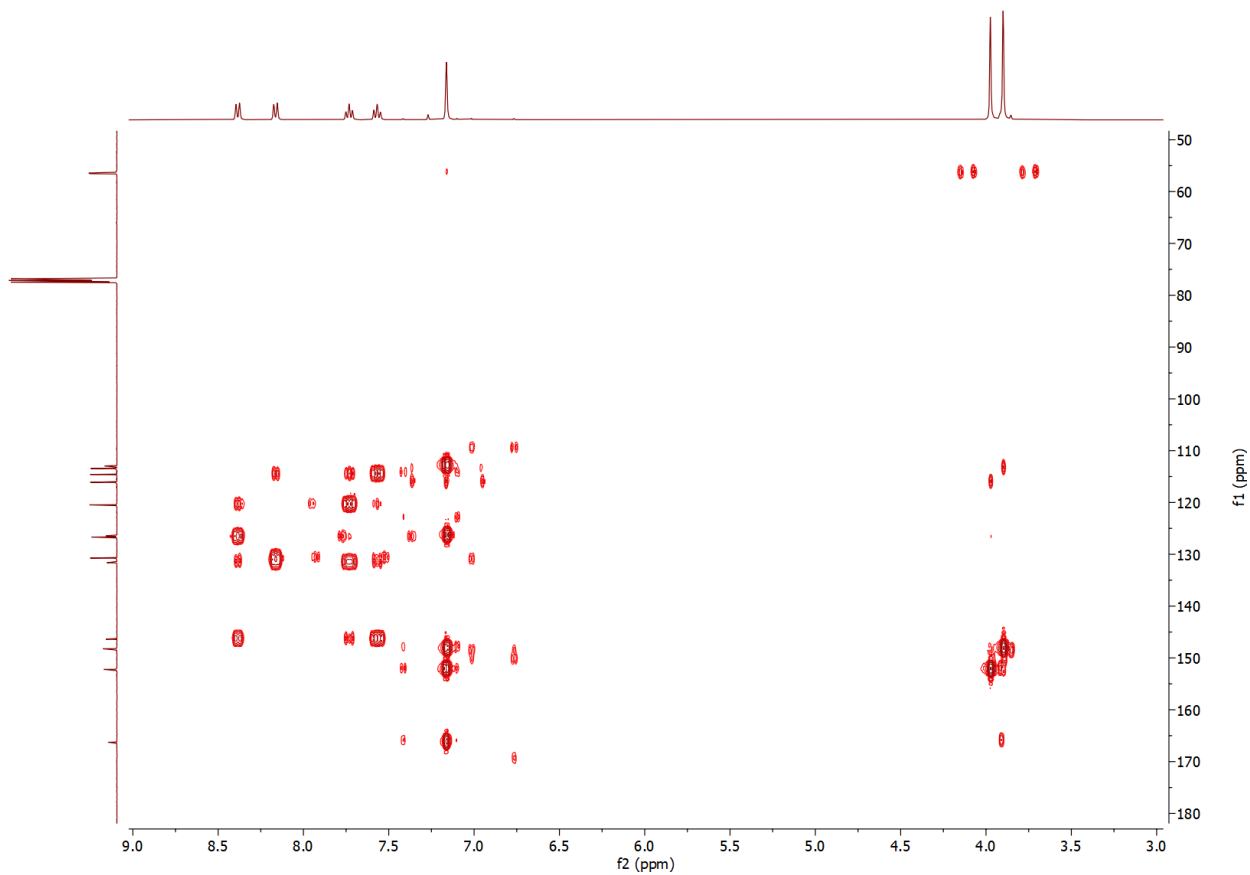

$^1\text{H}$ - $^{13}\text{C}$  HMBC spectrum of **8**

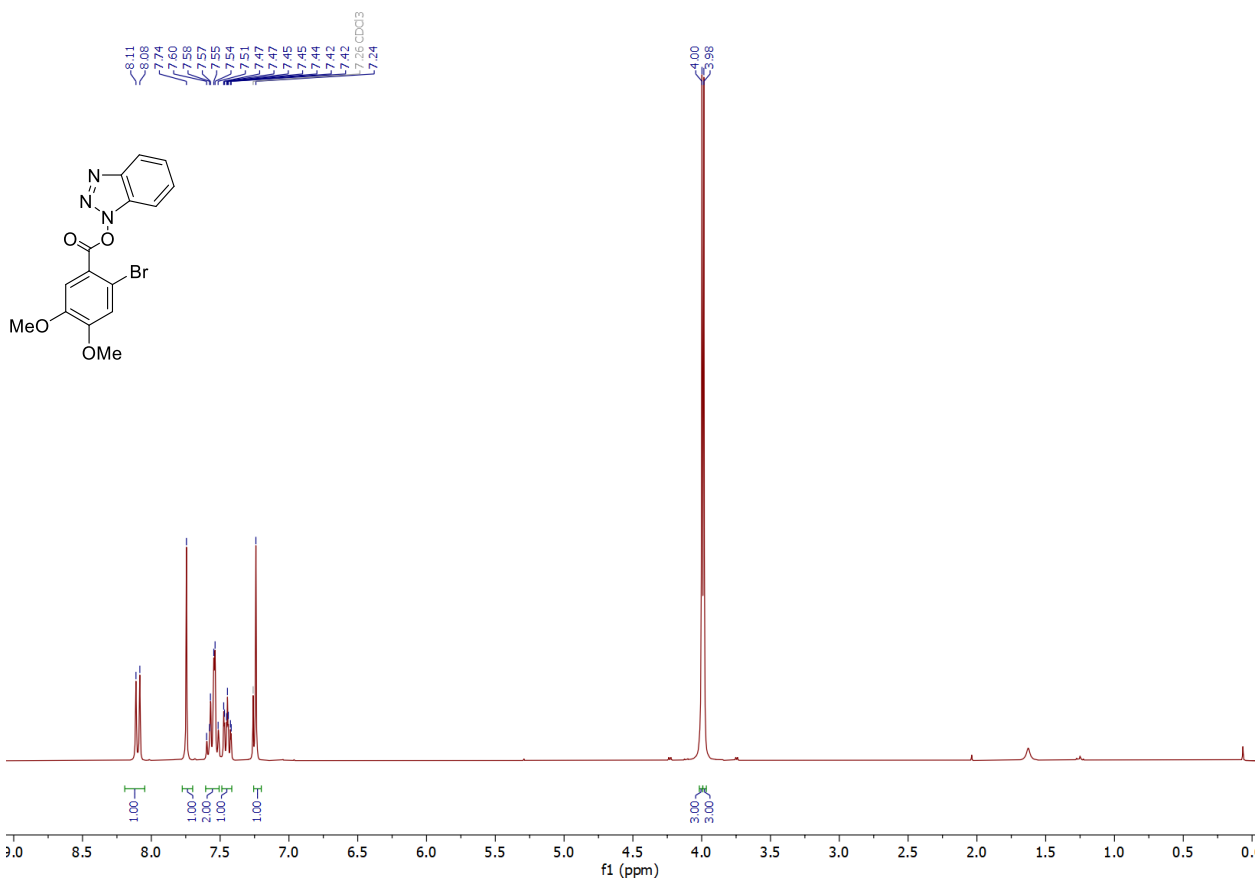

$^1\text{H}$  NMR (300 MHz,  $\text{CDCl}_3$ ) spectrum of **9a**

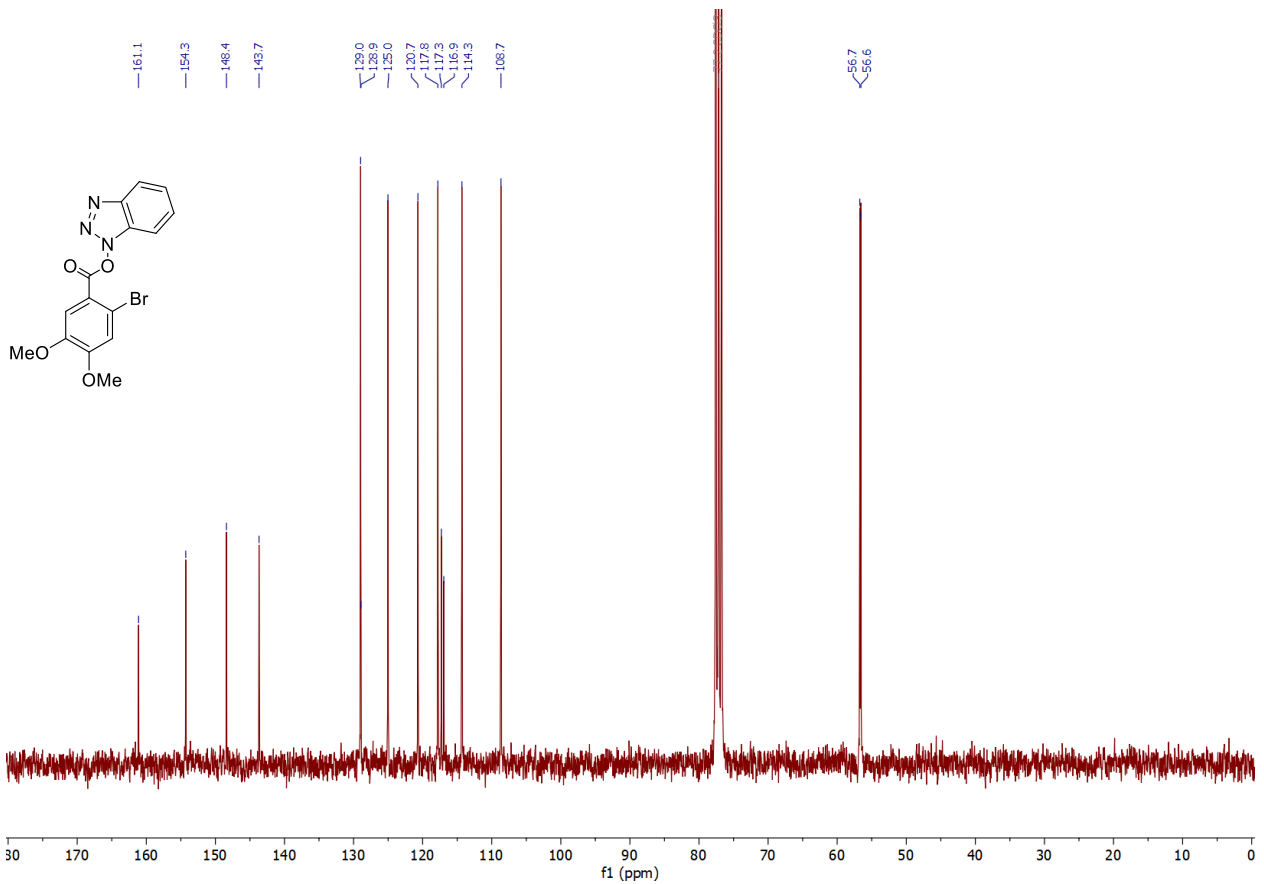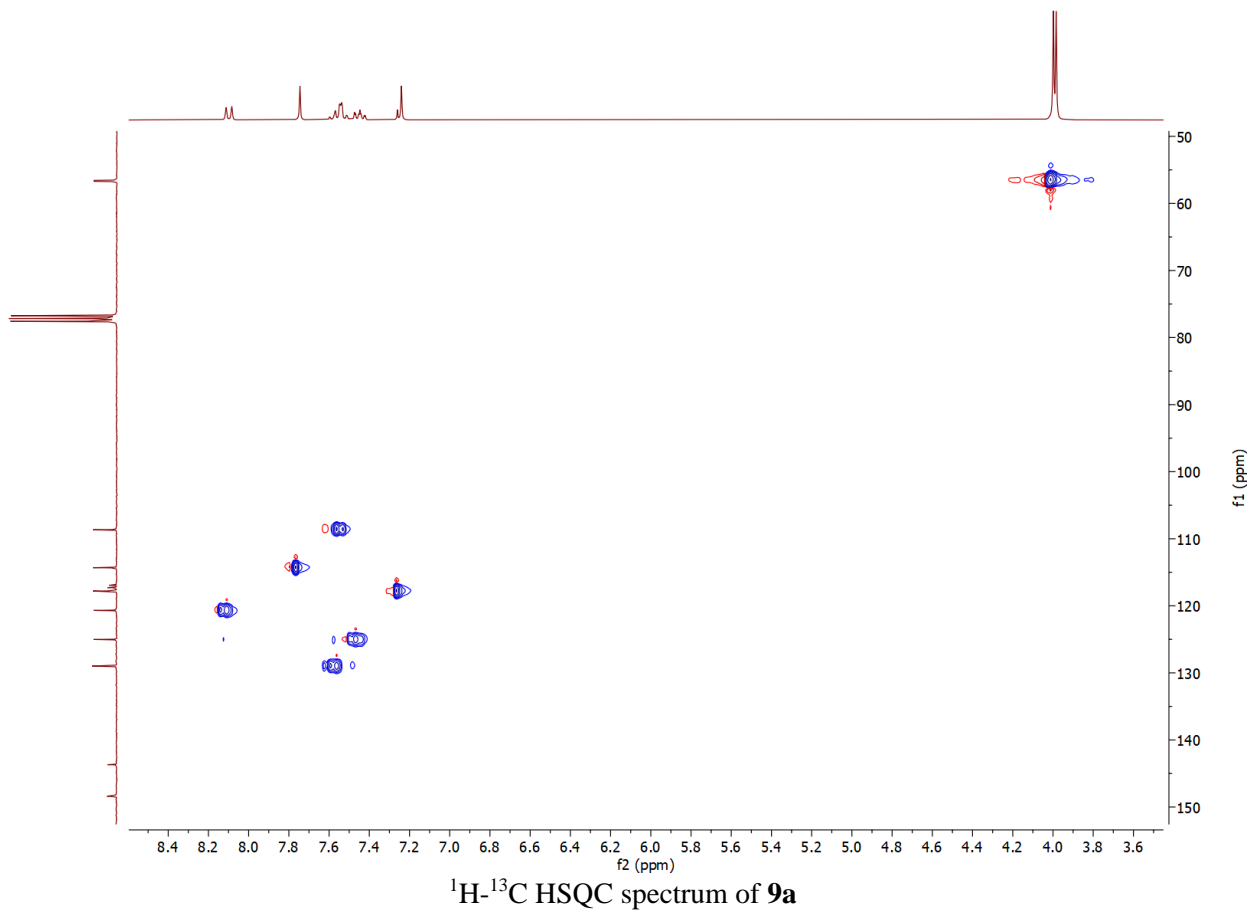

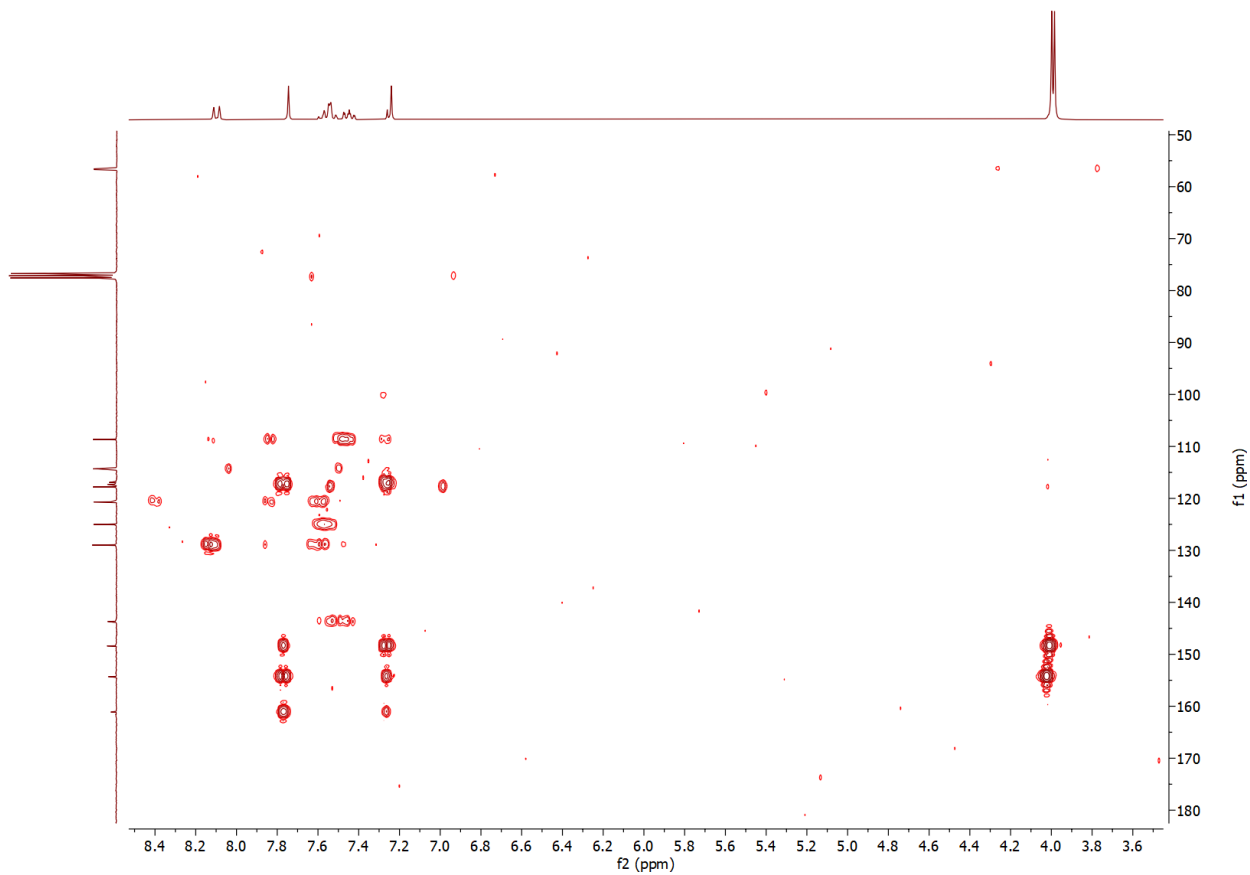

$^1\text{H}$ - $^{13}\text{C}$  HMBC spectrum of **9a**

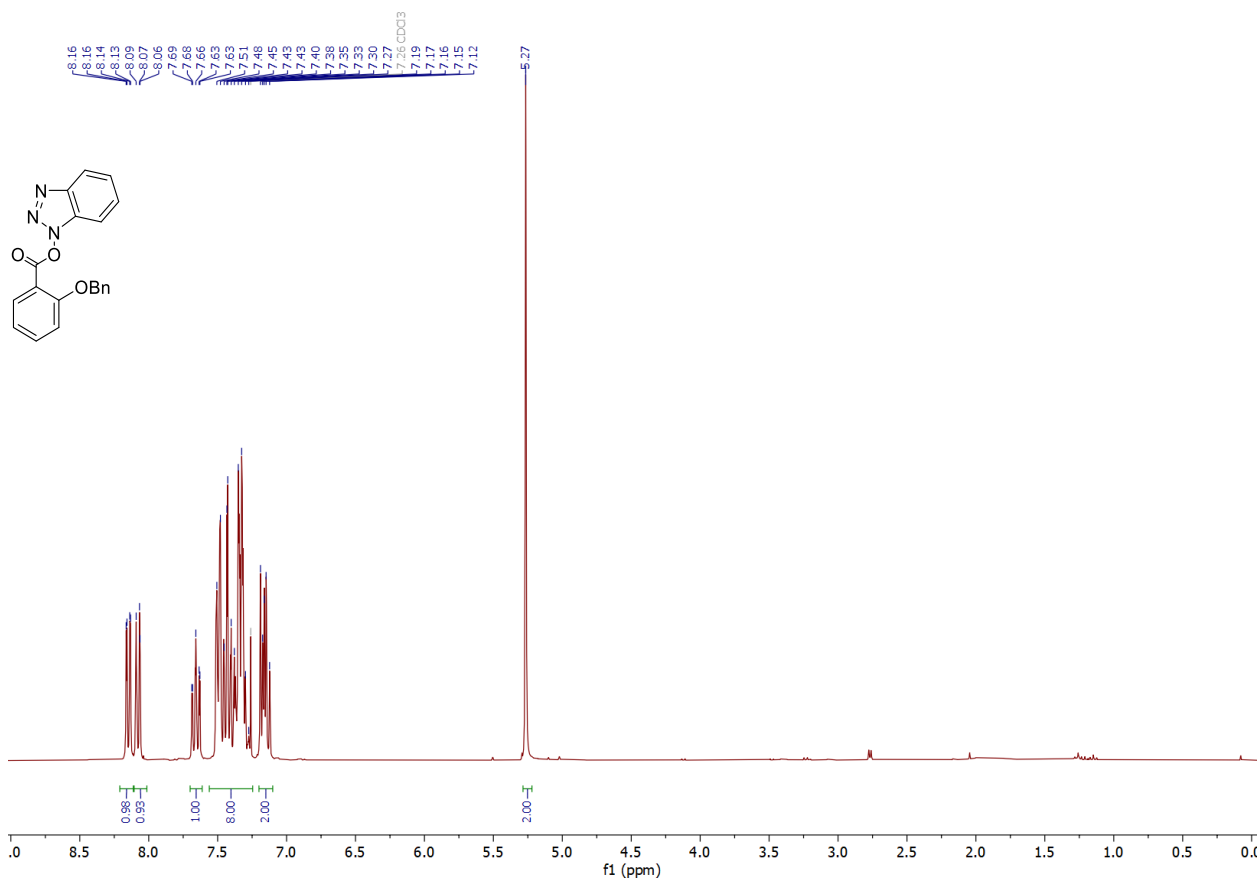

$^1\text{H}$  NMR (300 MHz,  $\text{CDCl}_3$ ) spectrum of **9b**



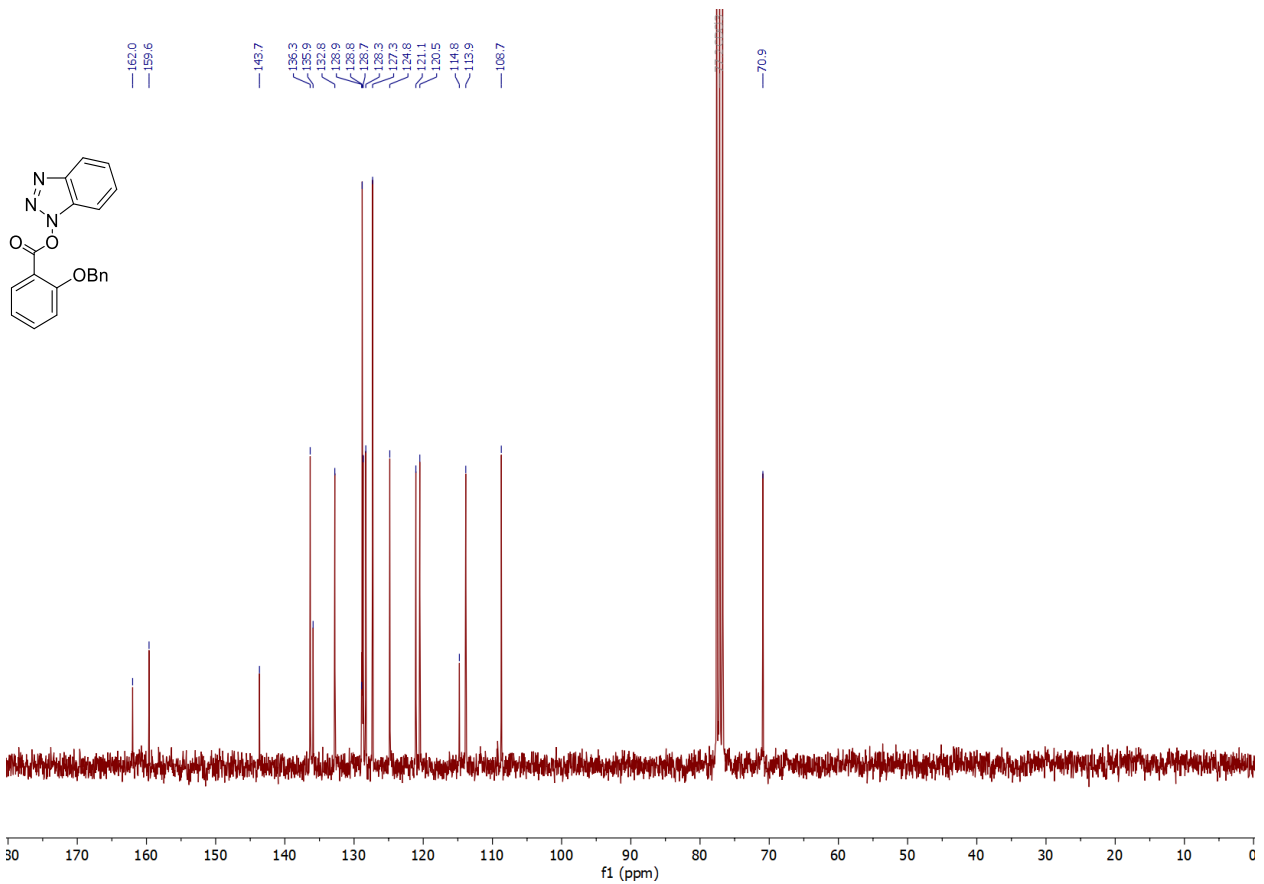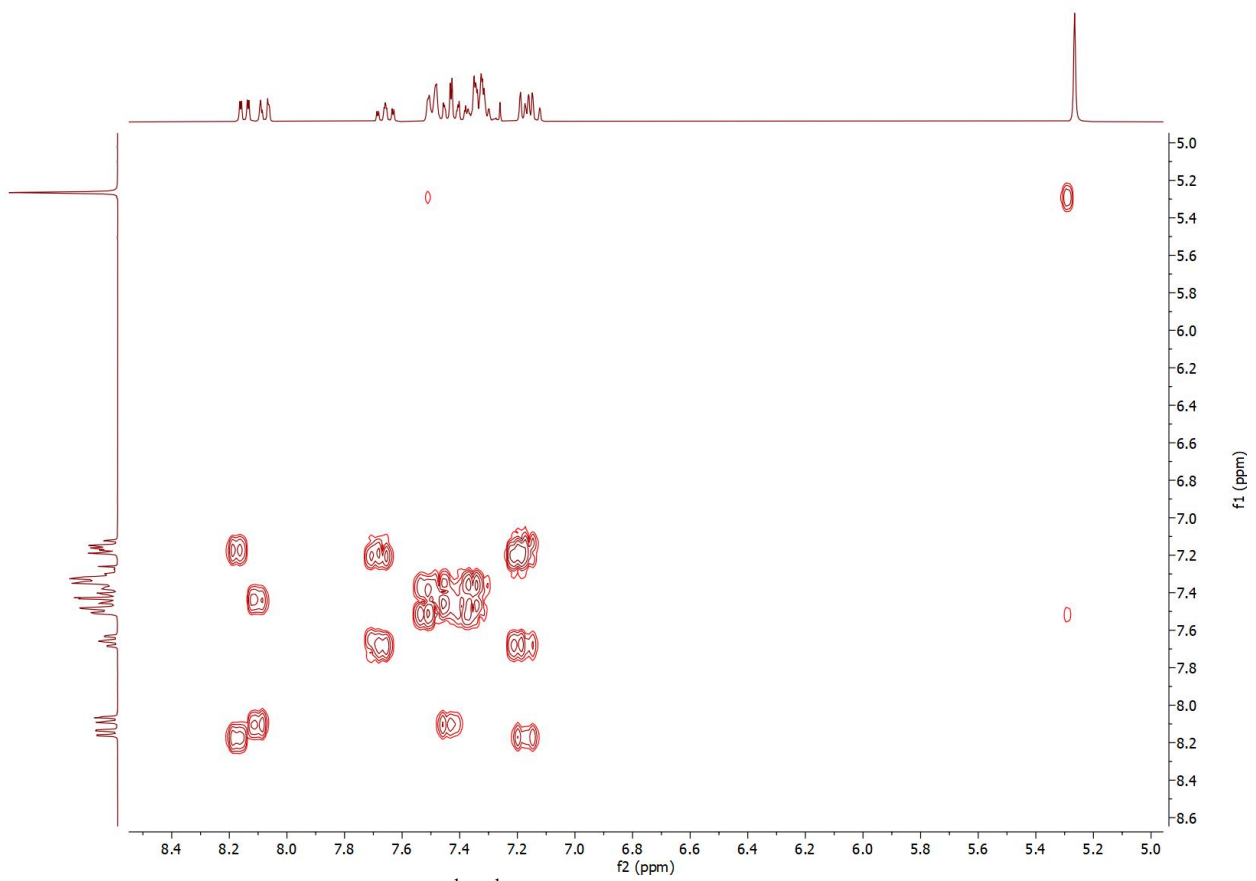

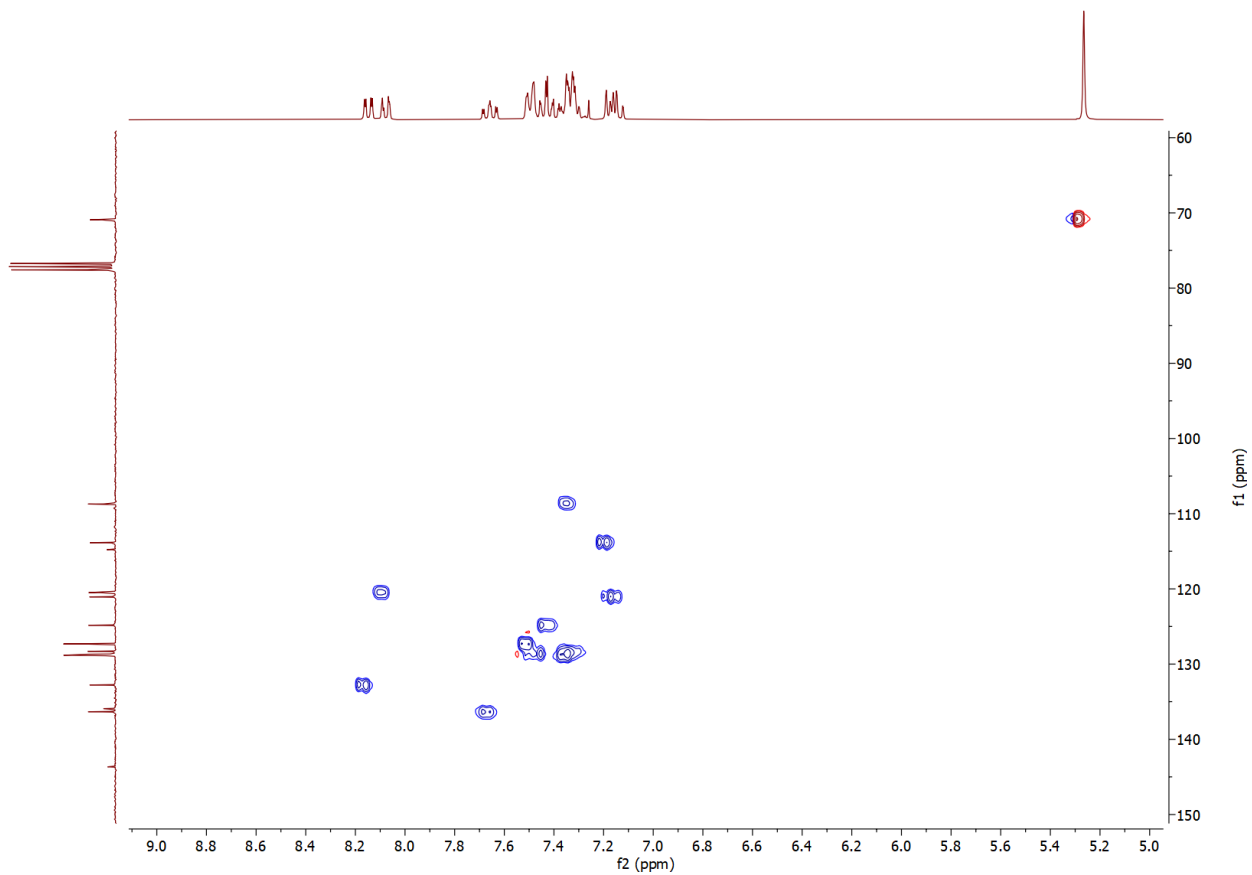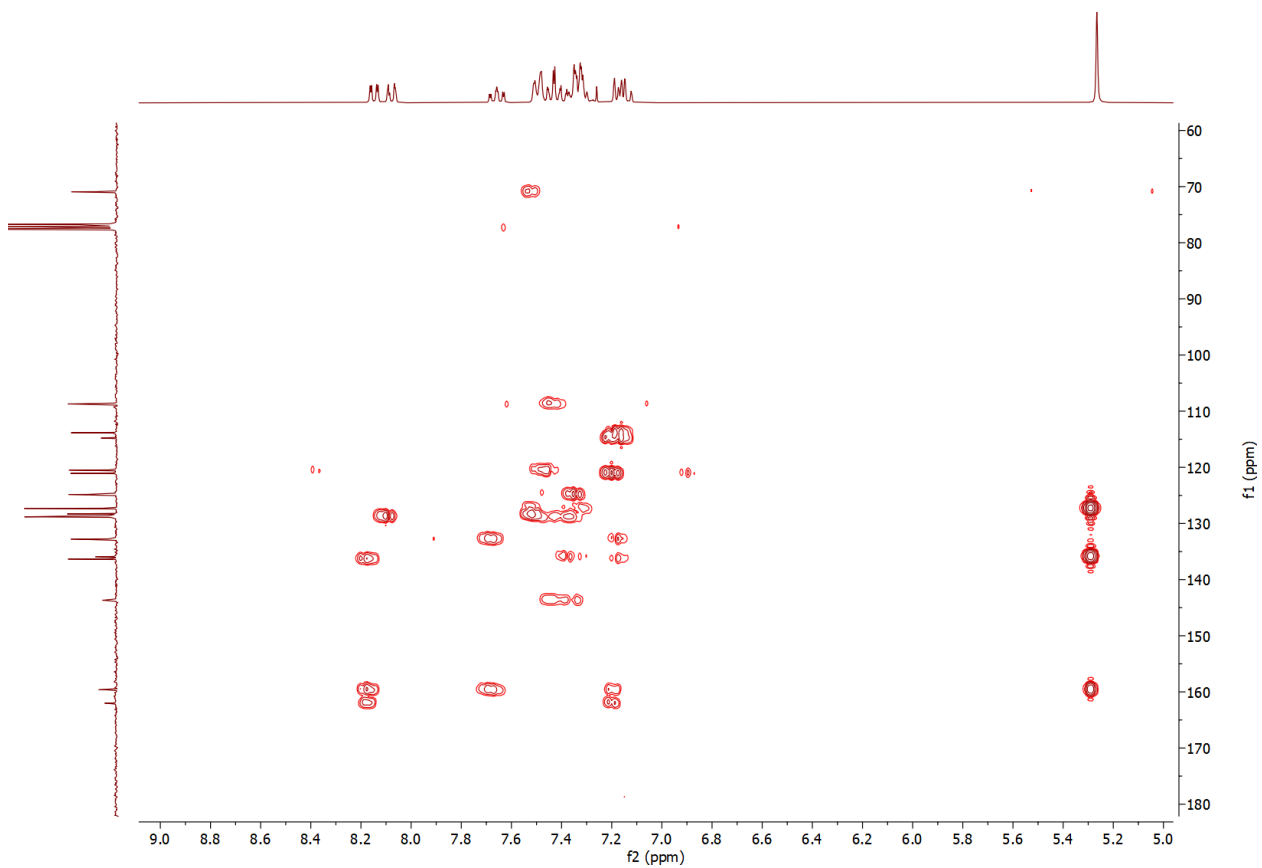

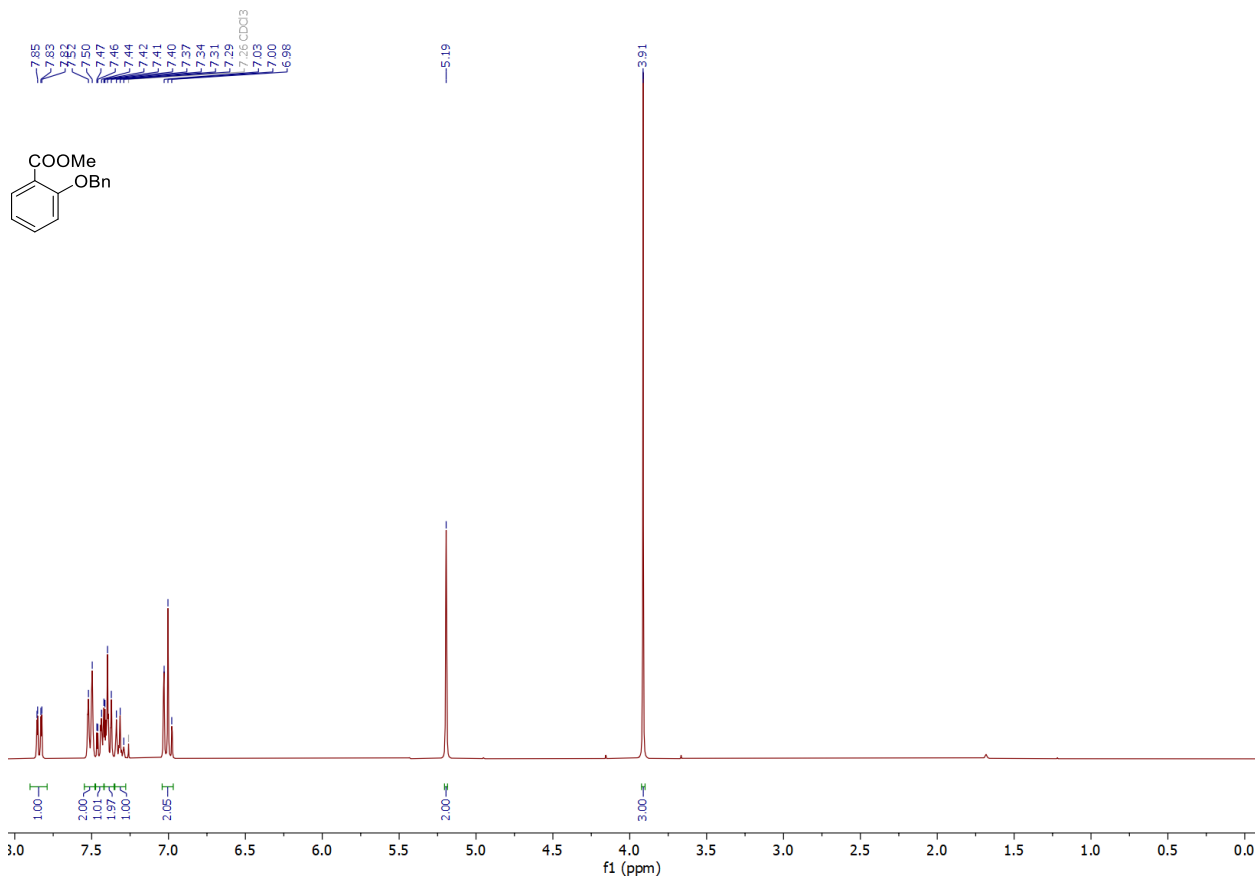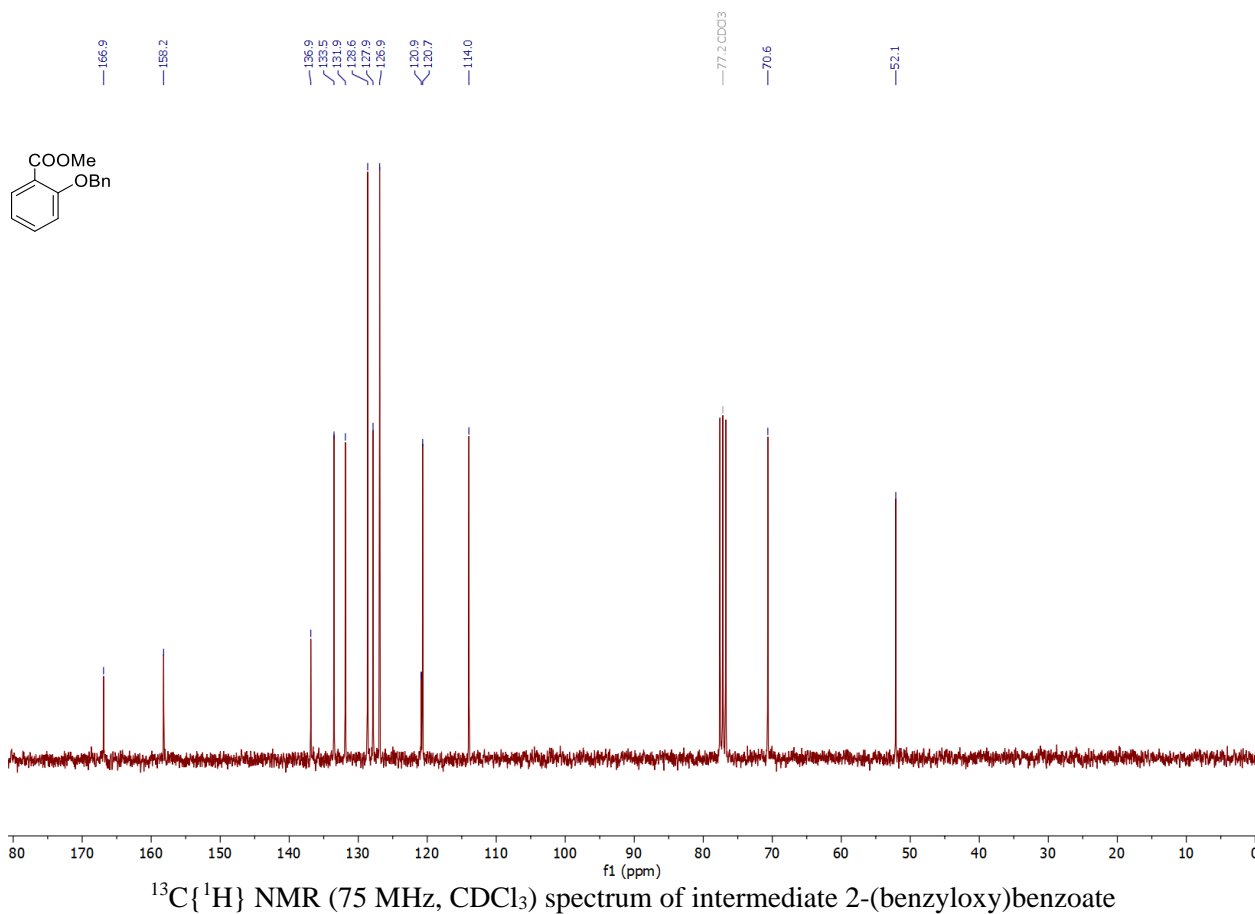

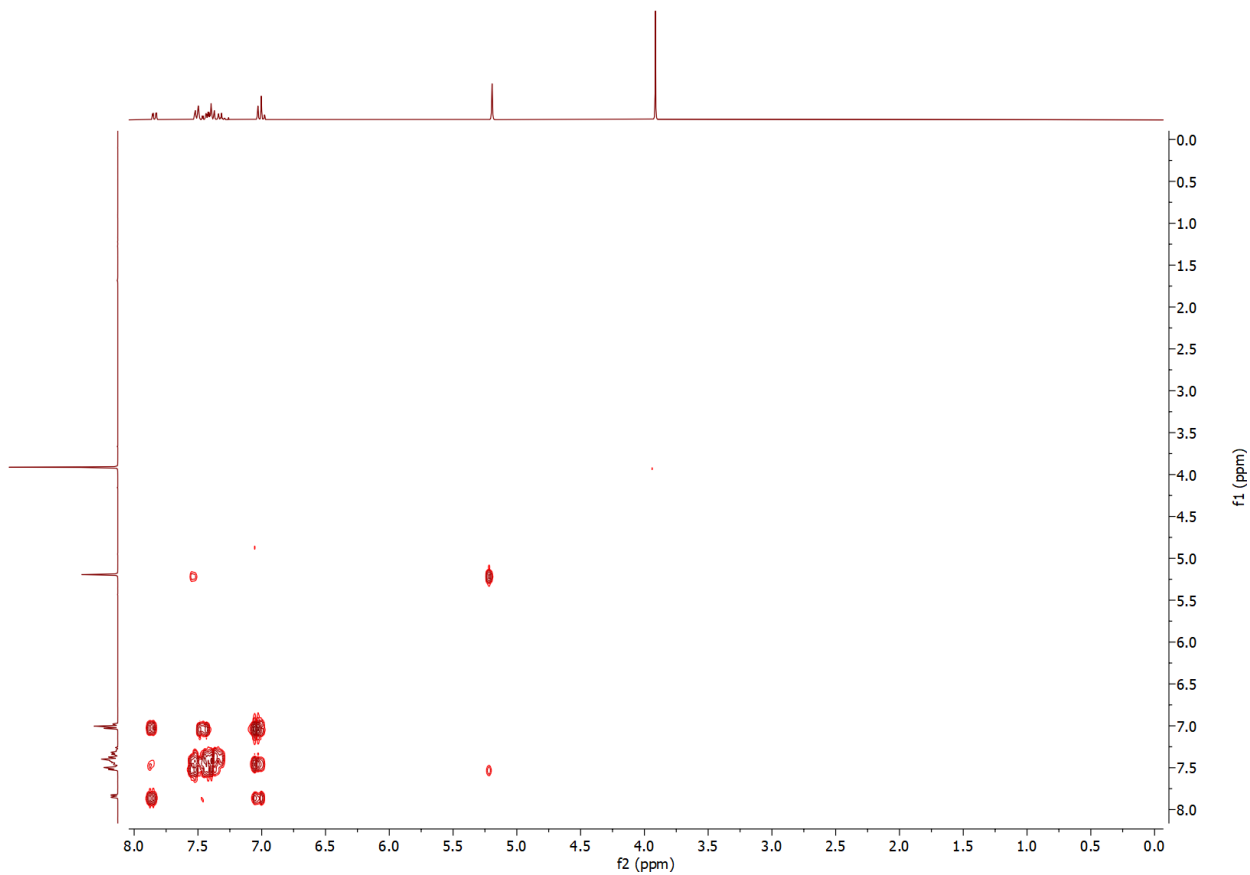

$^1\text{H}$ - $^1\text{H}$  COSY spectrum of intermediate 2-(benzyloxy)benzoate

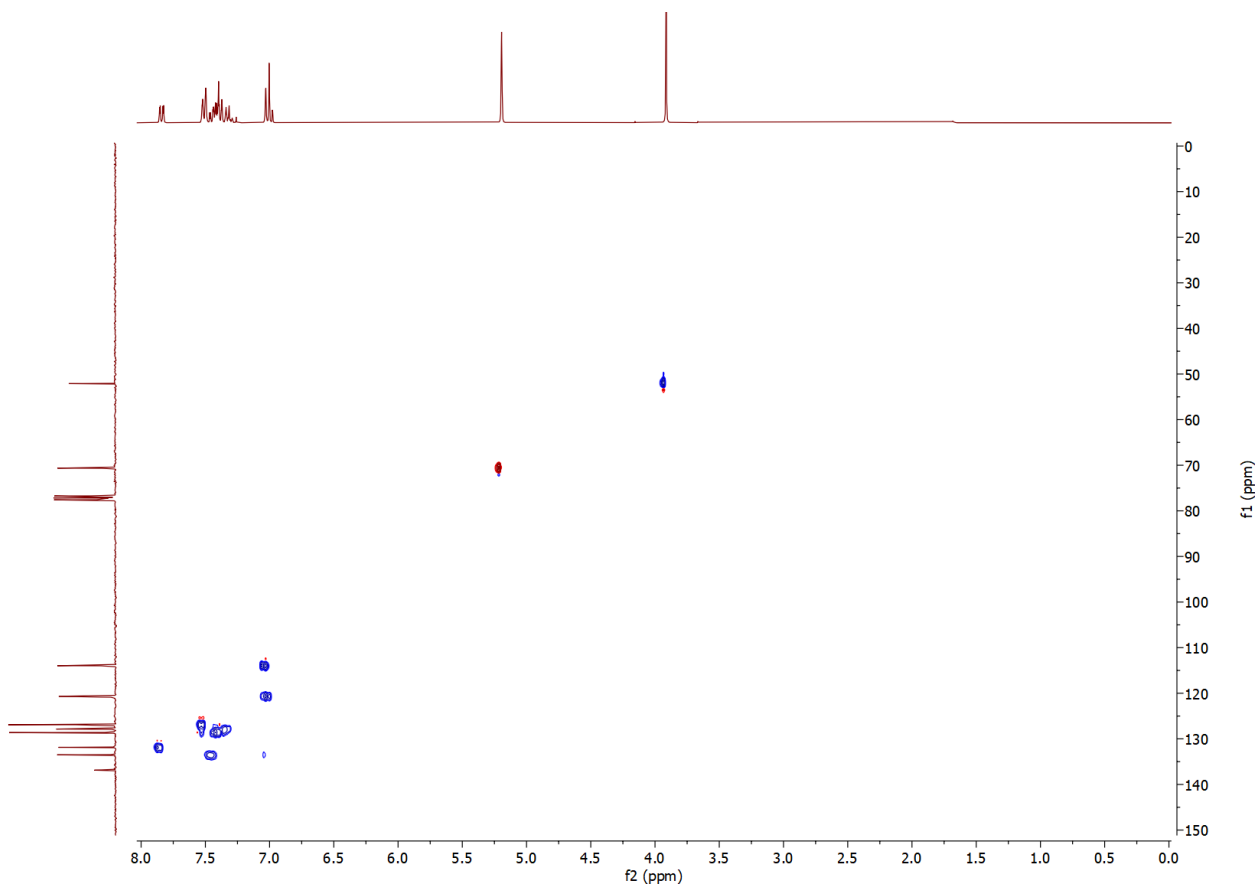

$^1\text{H}$ - $^{13}\text{C}$  HSQC spectrum of intermediate 2-(benzyloxy)benzoate

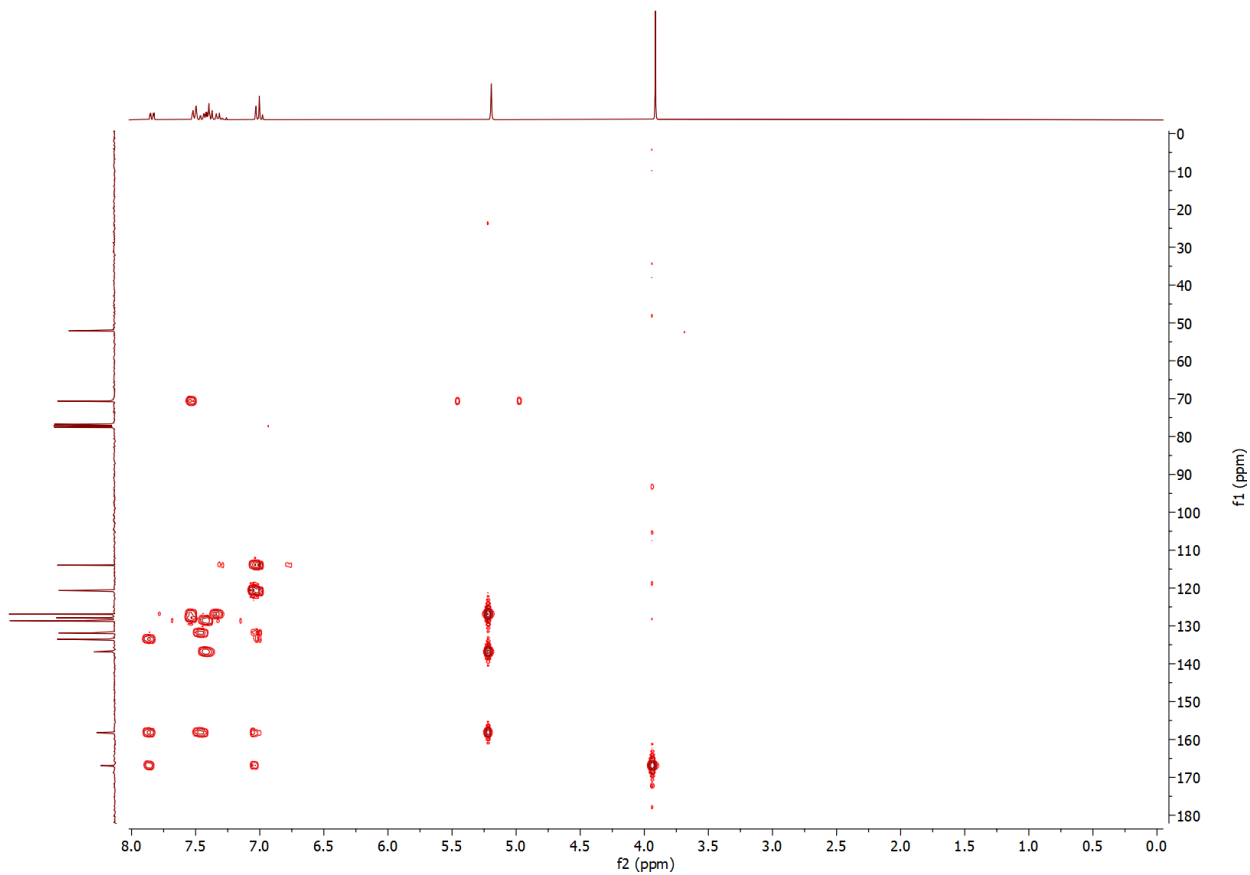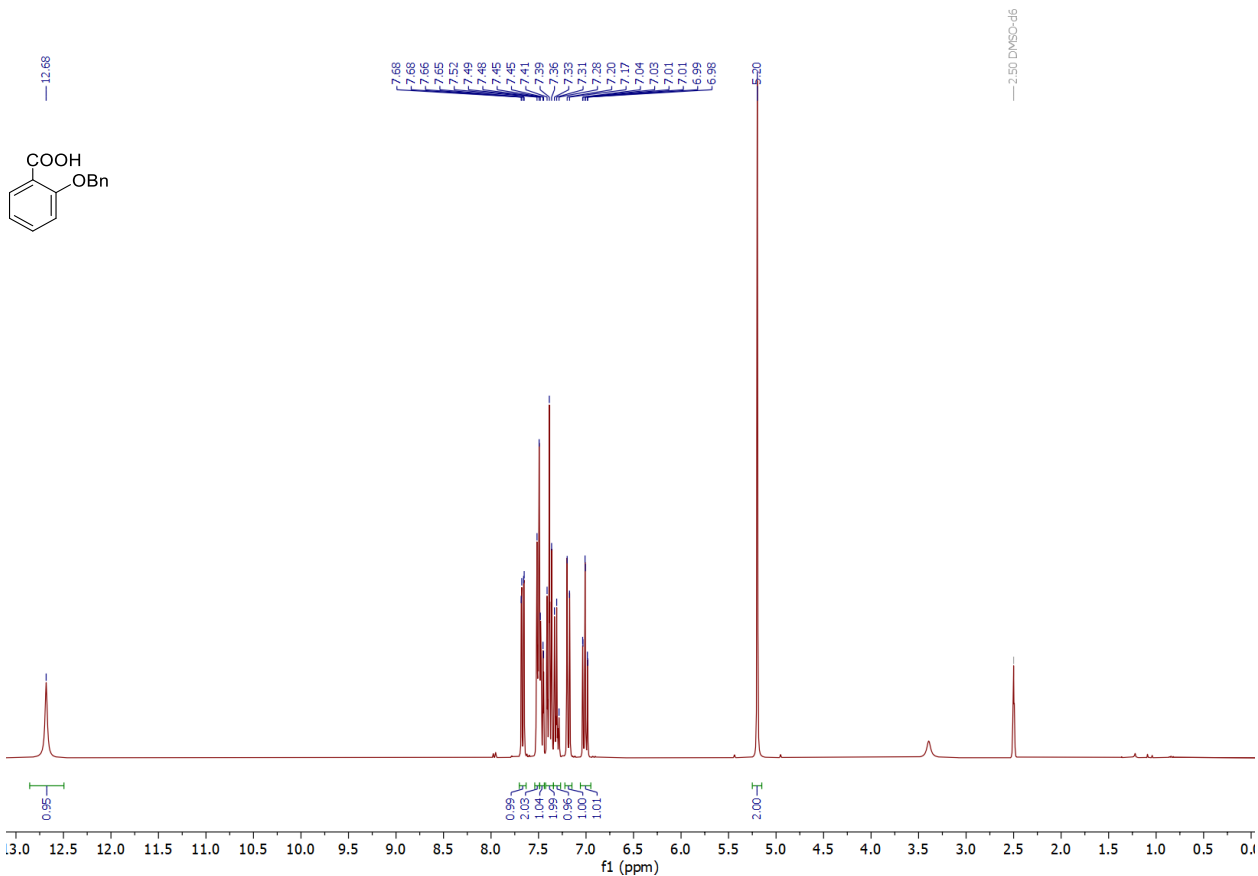

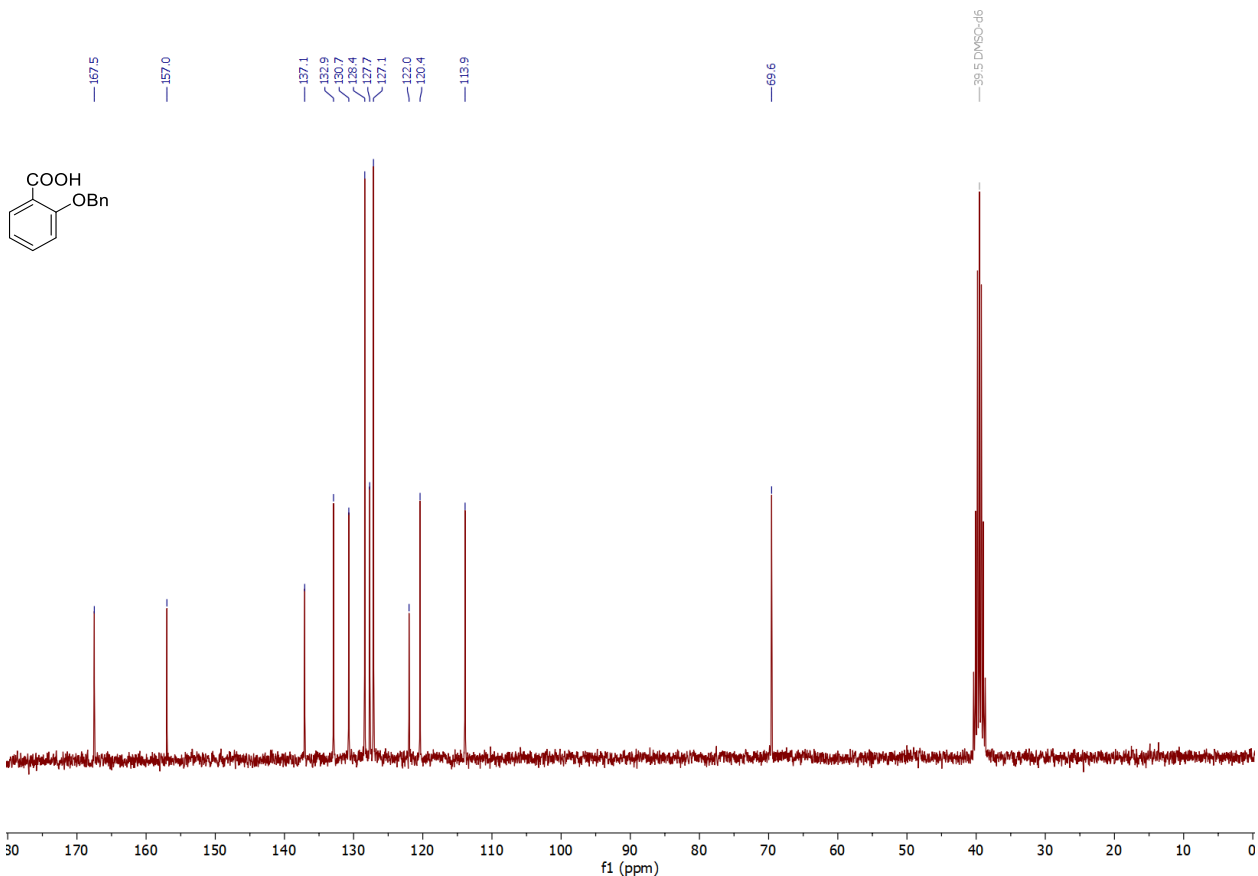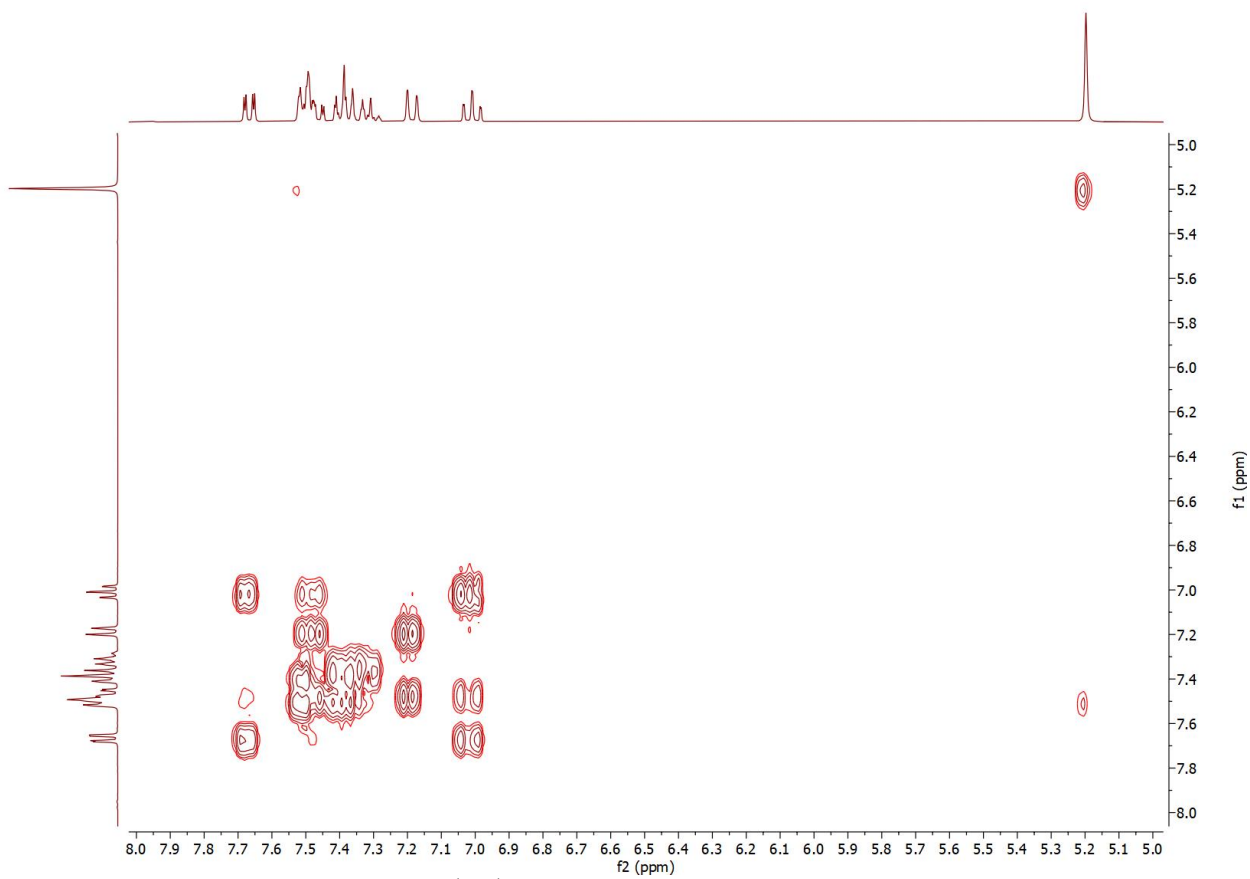

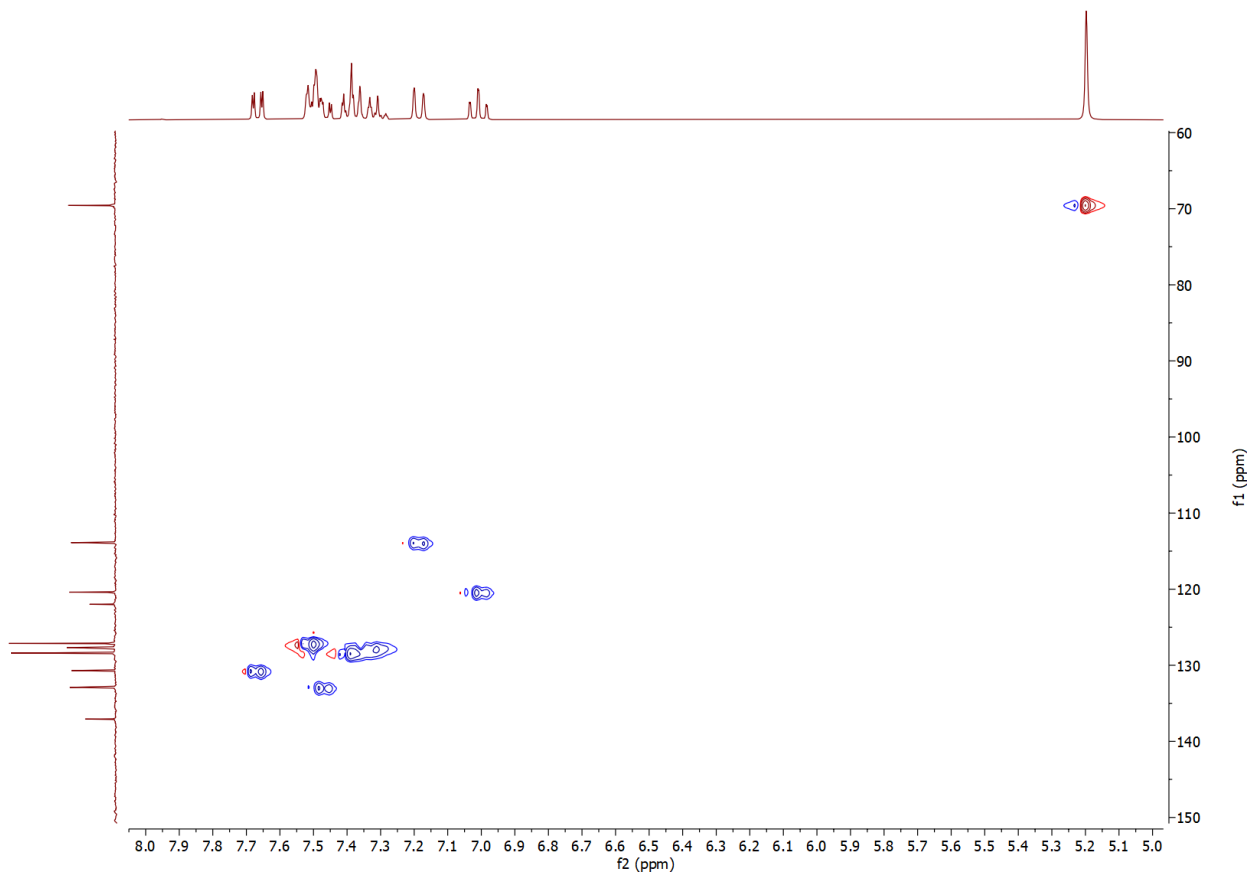

$^1\text{H}$ - $^{13}\text{C}$  HSQC spectrum of **11**

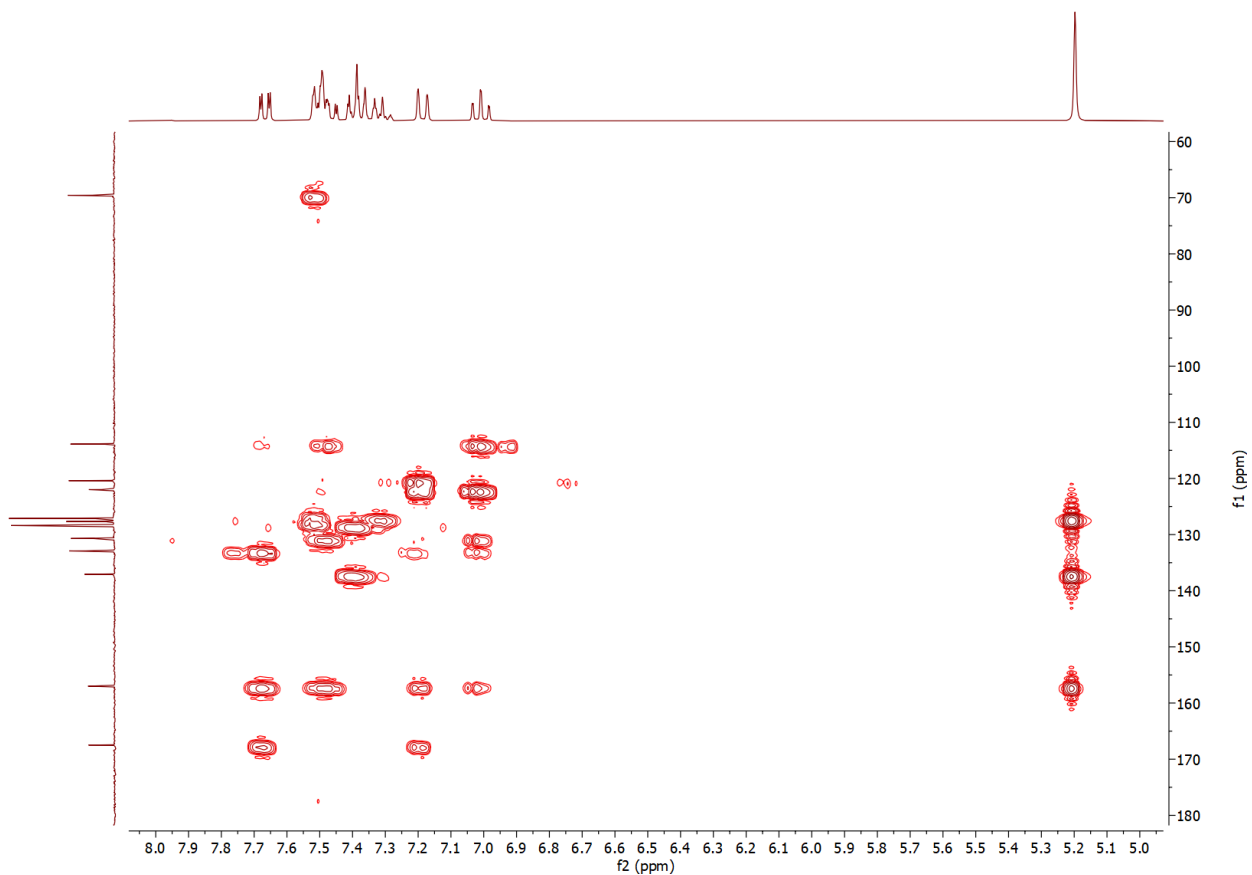

$^1\text{H}$ - $^{13}\text{C}$  HMBC spectrum of **11**

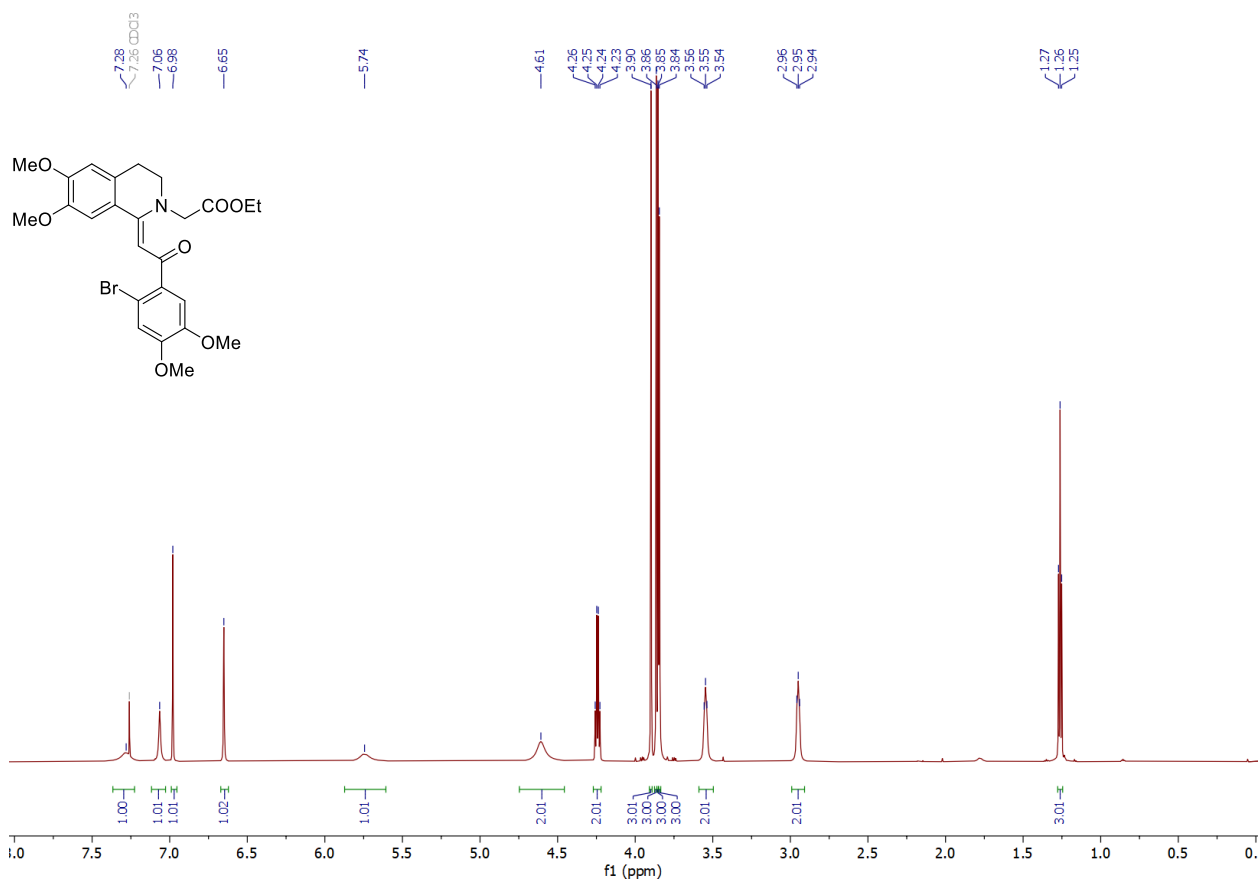

<sup>1</sup>H NMR (700 MHz, CDCl<sub>3</sub>) spectrum of **12a**

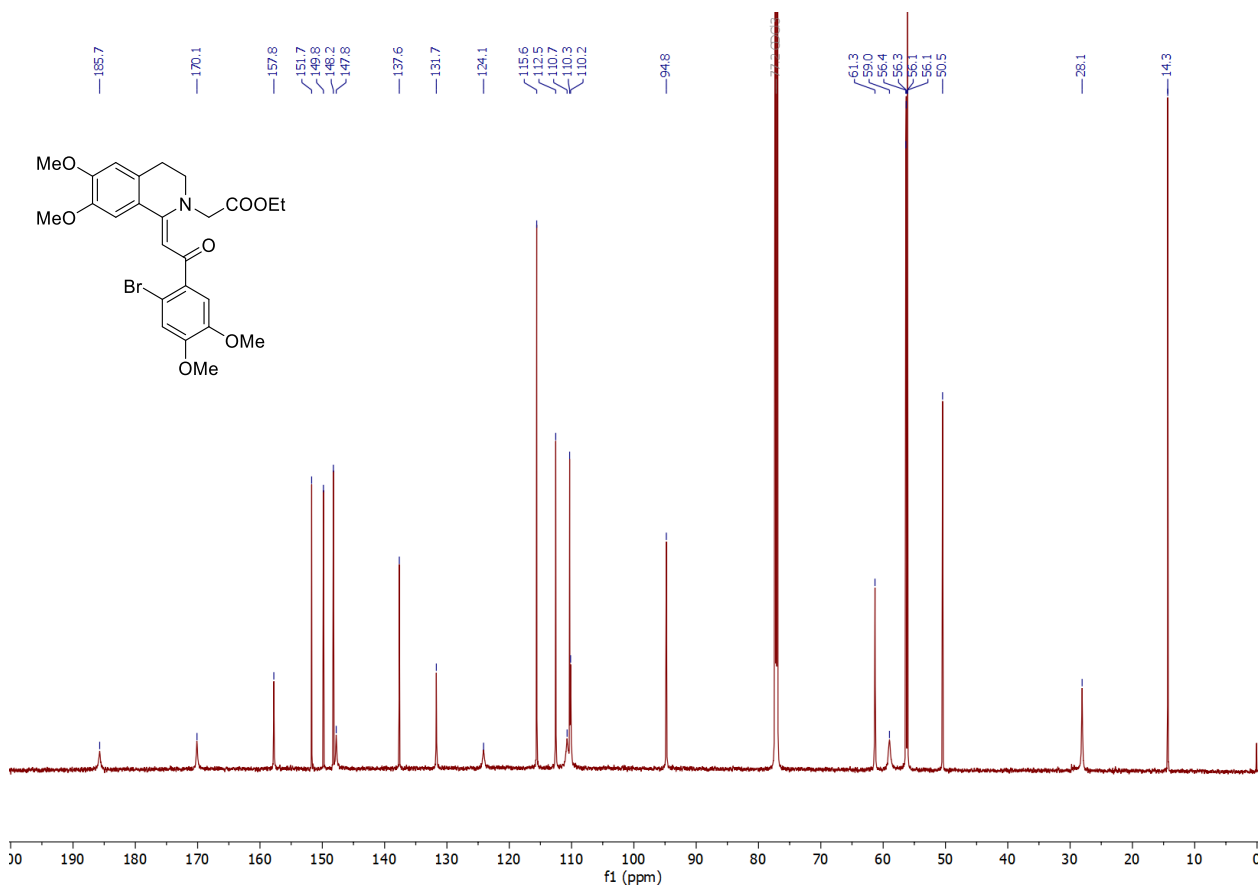

<sup>13</sup>C{<sup>1</sup>H} NMR (176 MHz, CDCl<sub>3</sub>) spectrum of **12a**



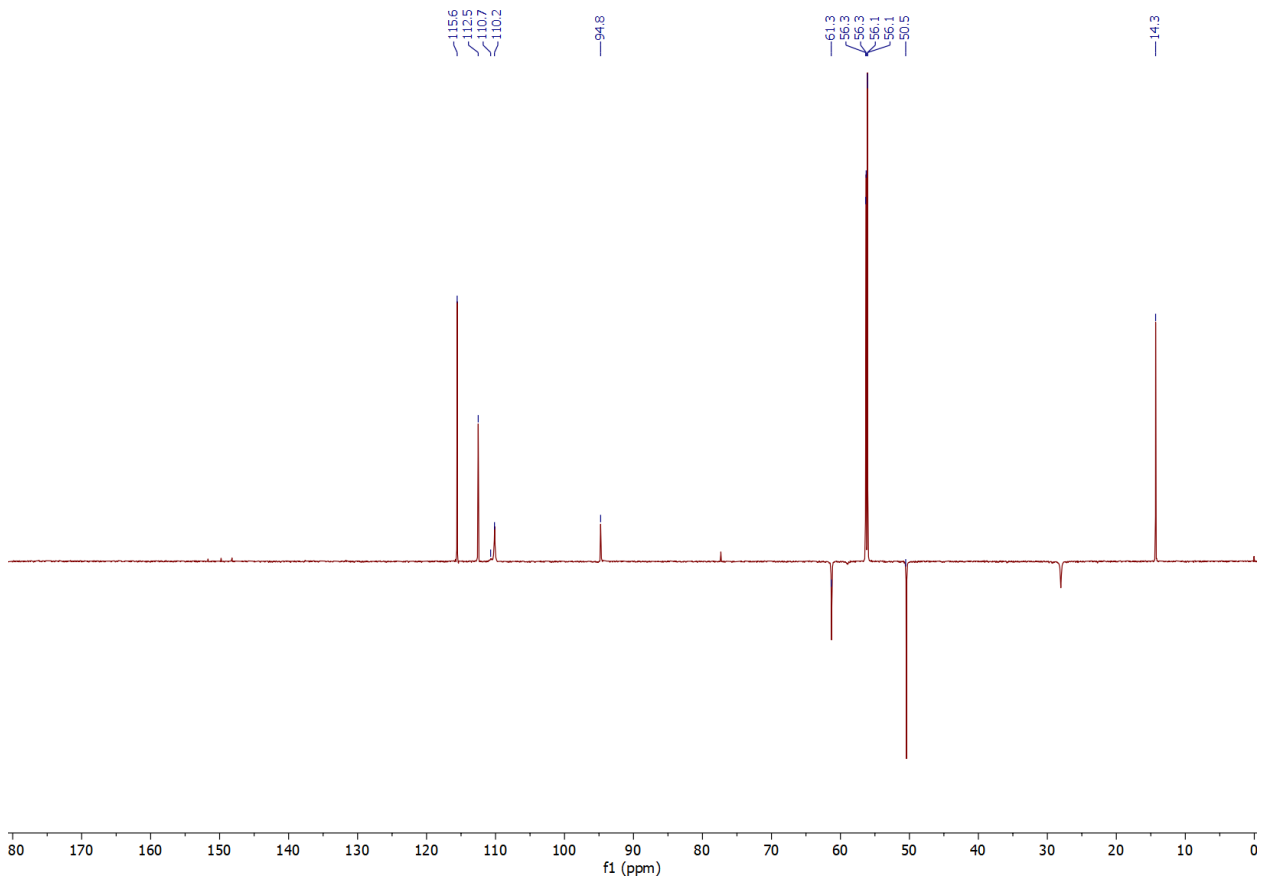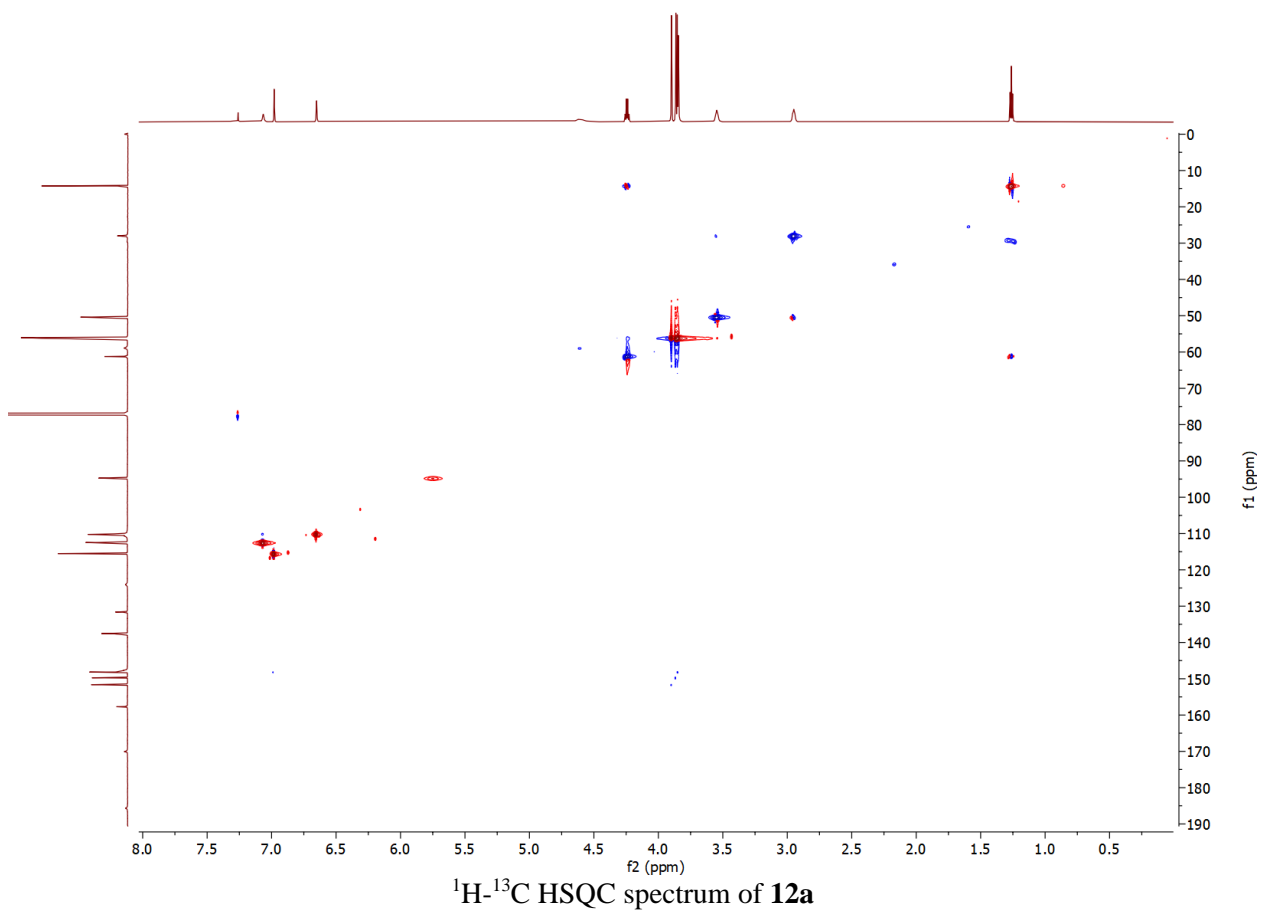

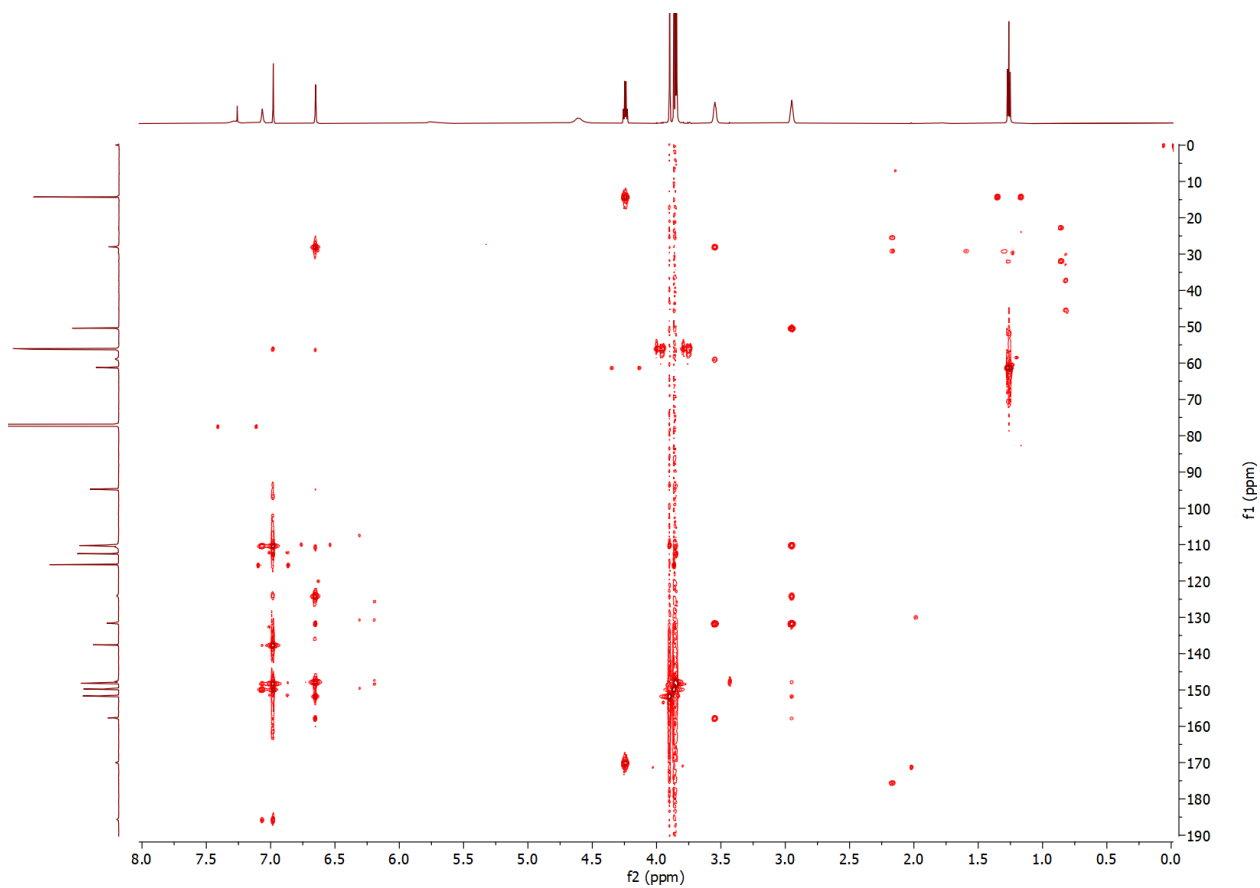

$^1\text{H}$ - $^{13}\text{C}$  HMBC spectrum of 12a

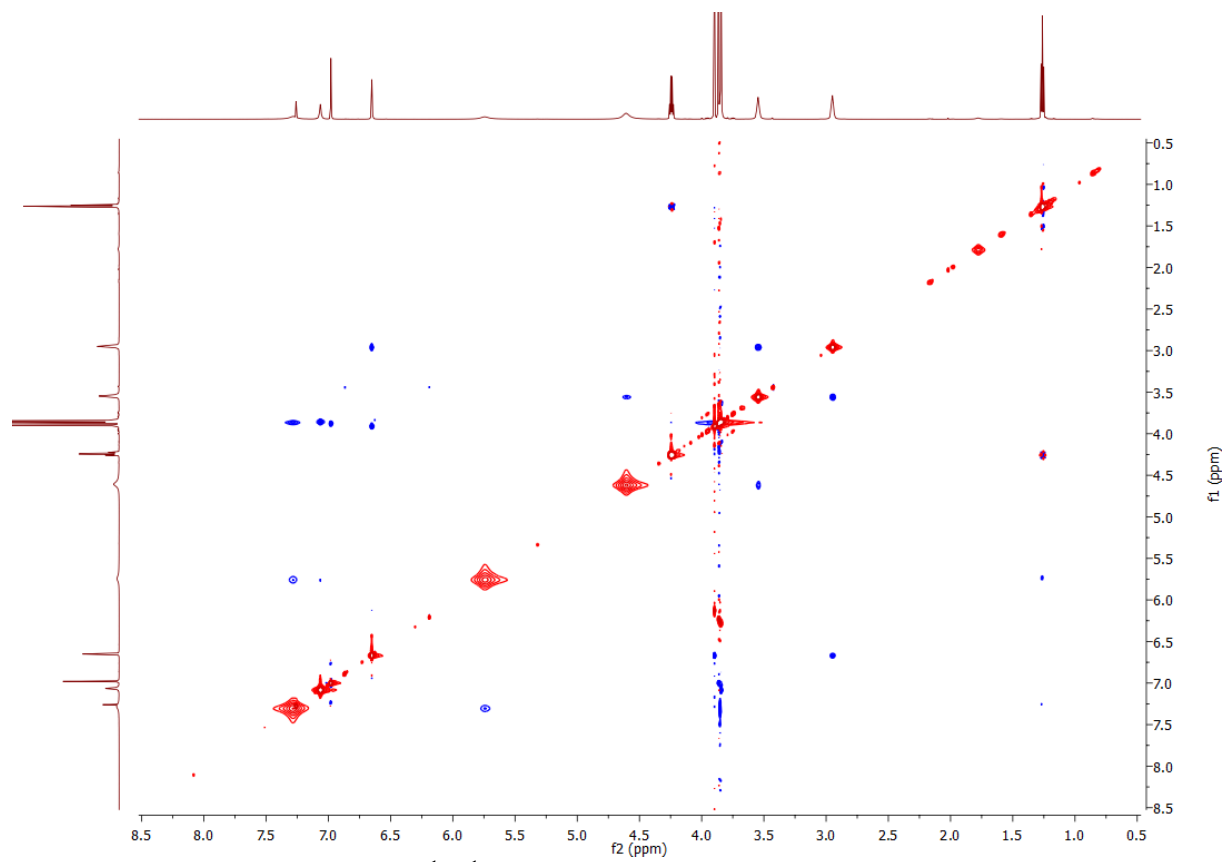

$^1\text{H}$ - $^1\text{H}$  NOESY spectrum of 12a

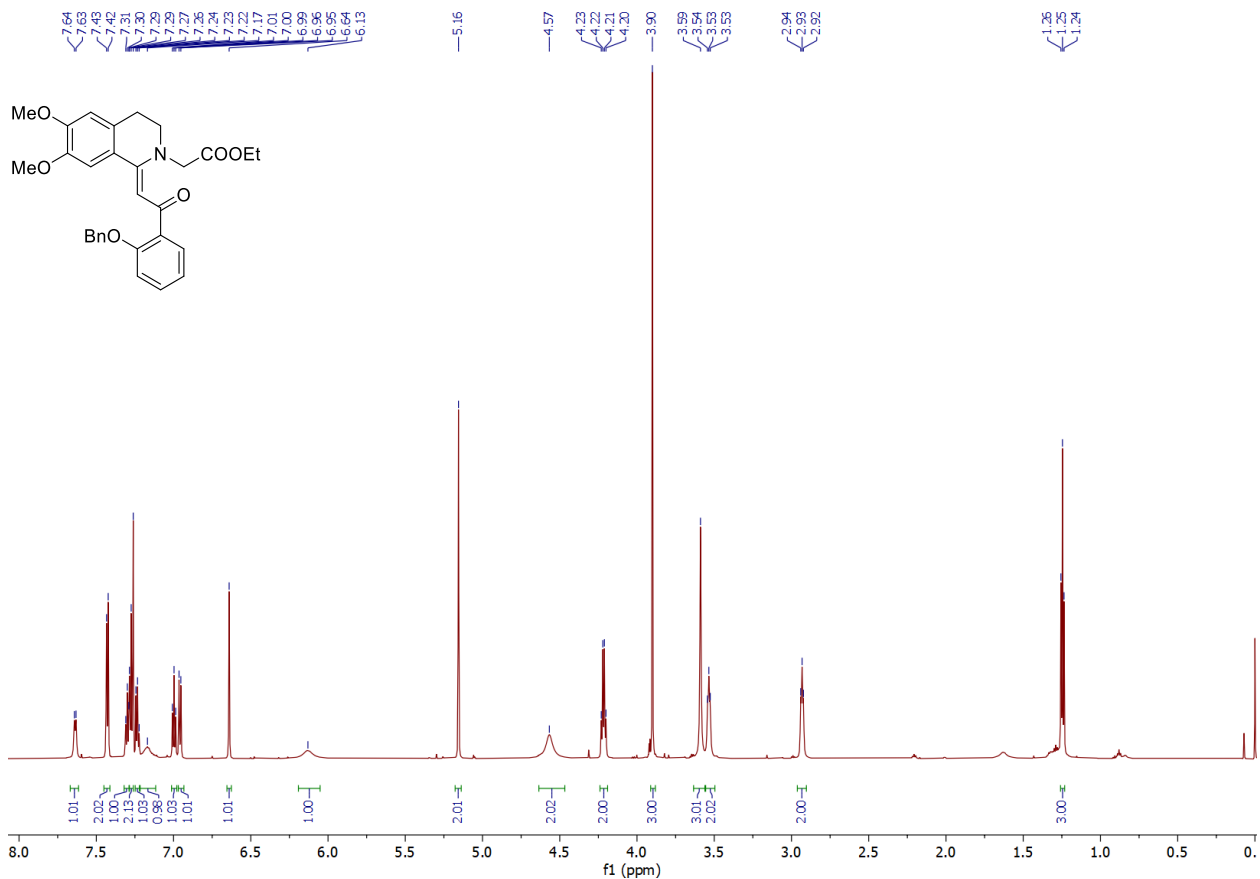

$^1\text{H}$  NMR (700 MHz,  $\text{CDCl}_3$ ) spectrum of **12b**

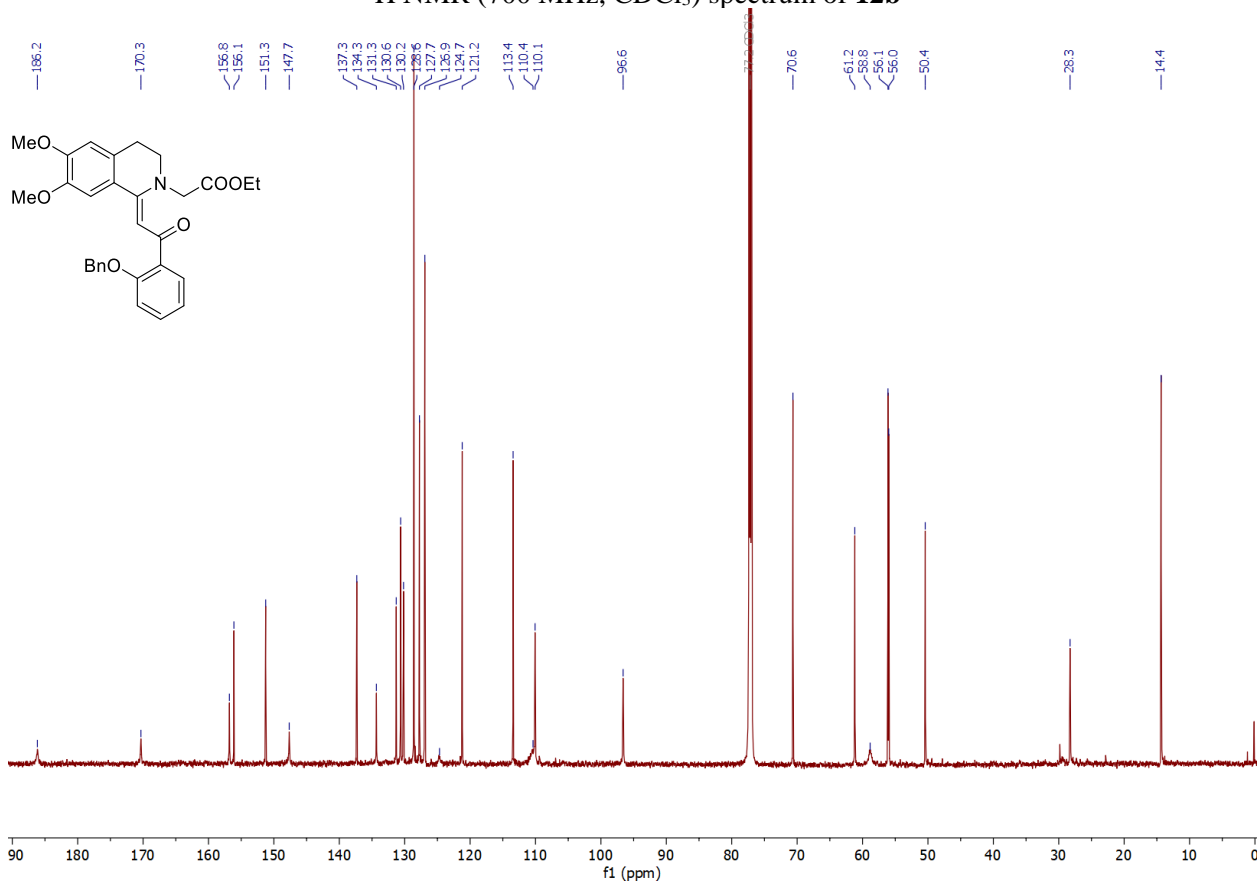

$^{13}\text{C}\{^1\text{H}\}$  NMR (176 MHz,  $\text{CDCl}_3$ ) spectrum of **12b**

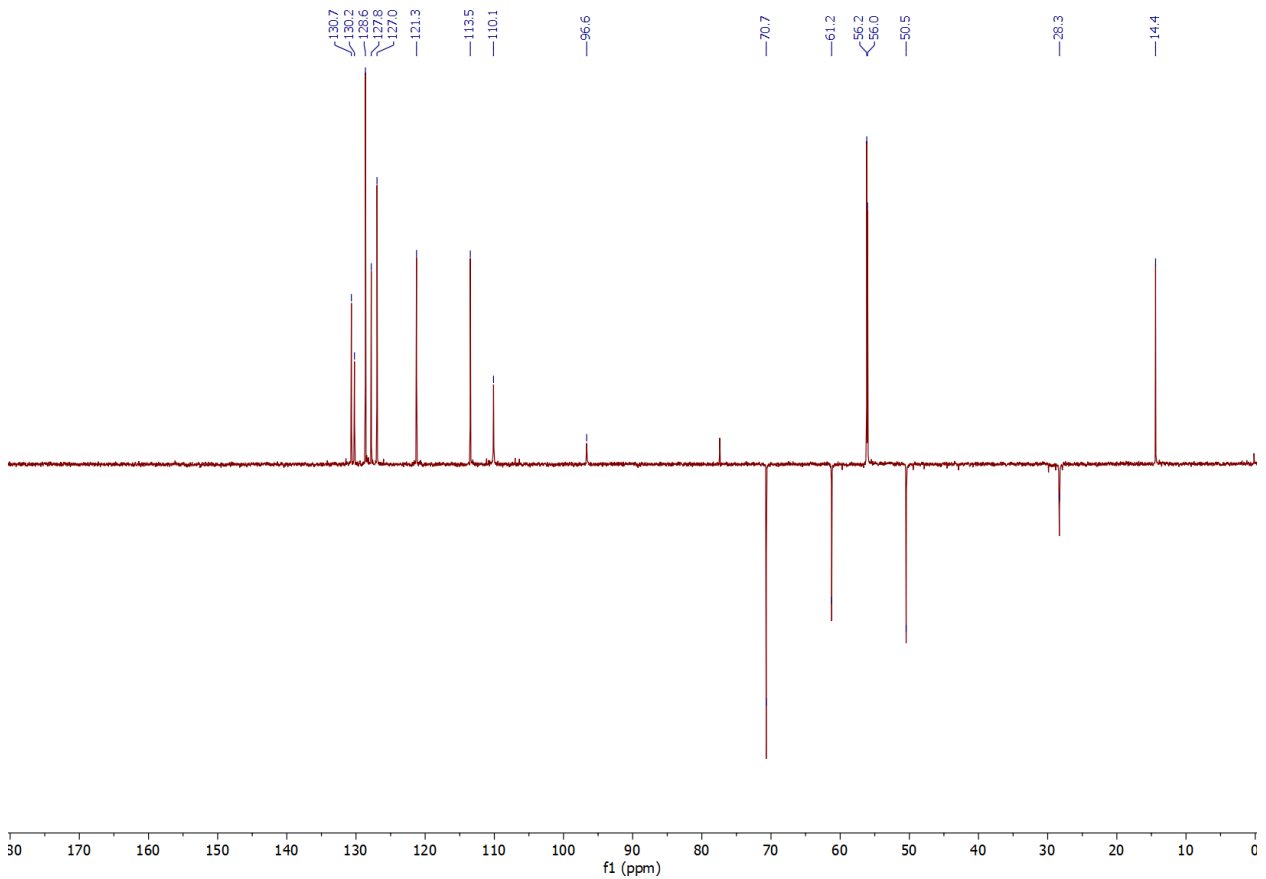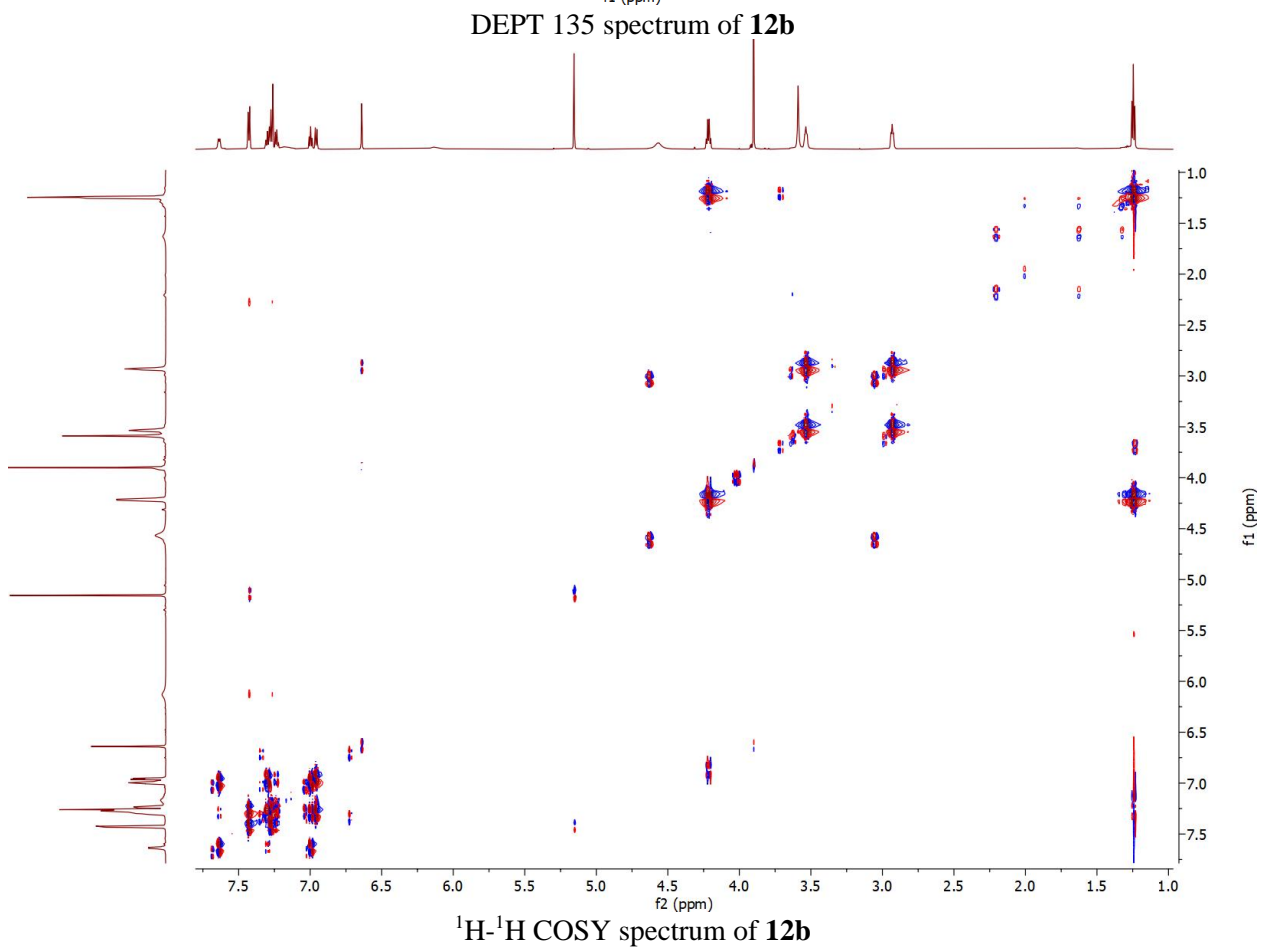

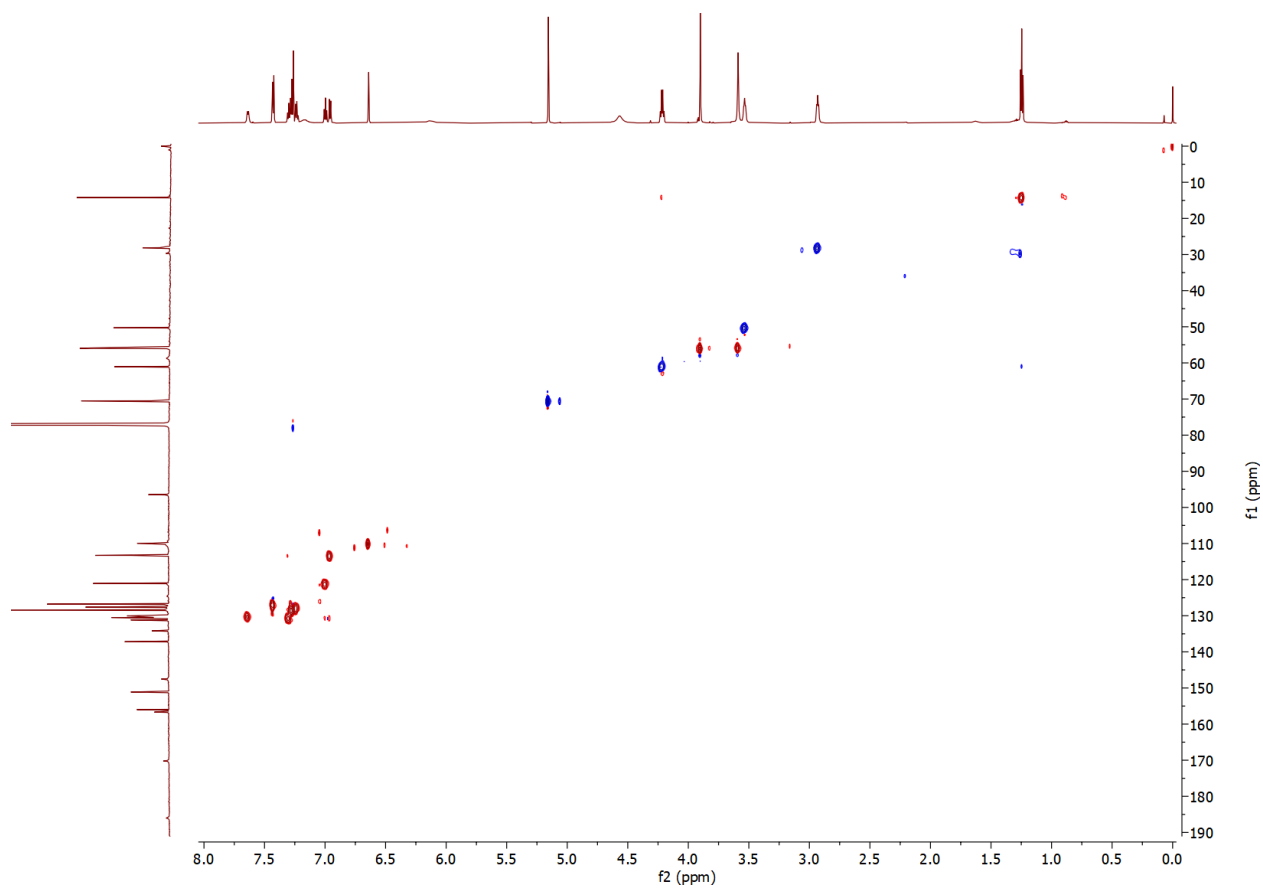

$^1\text{H}$ - $^{13}\text{C}$  HSQC spectrum of **12b**

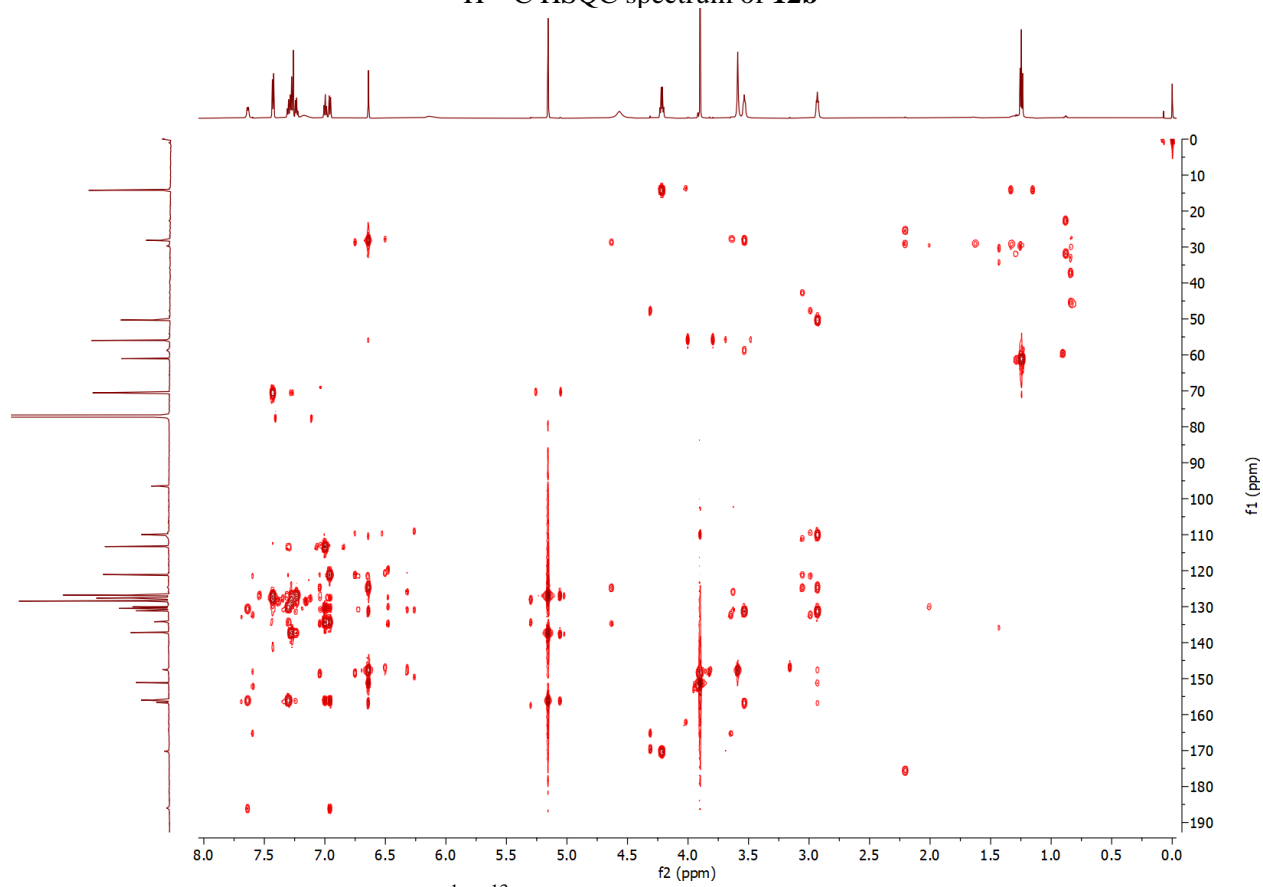

$^1\text{H}$ - $^{13}\text{C}$  HMBC spectrum of **12b**

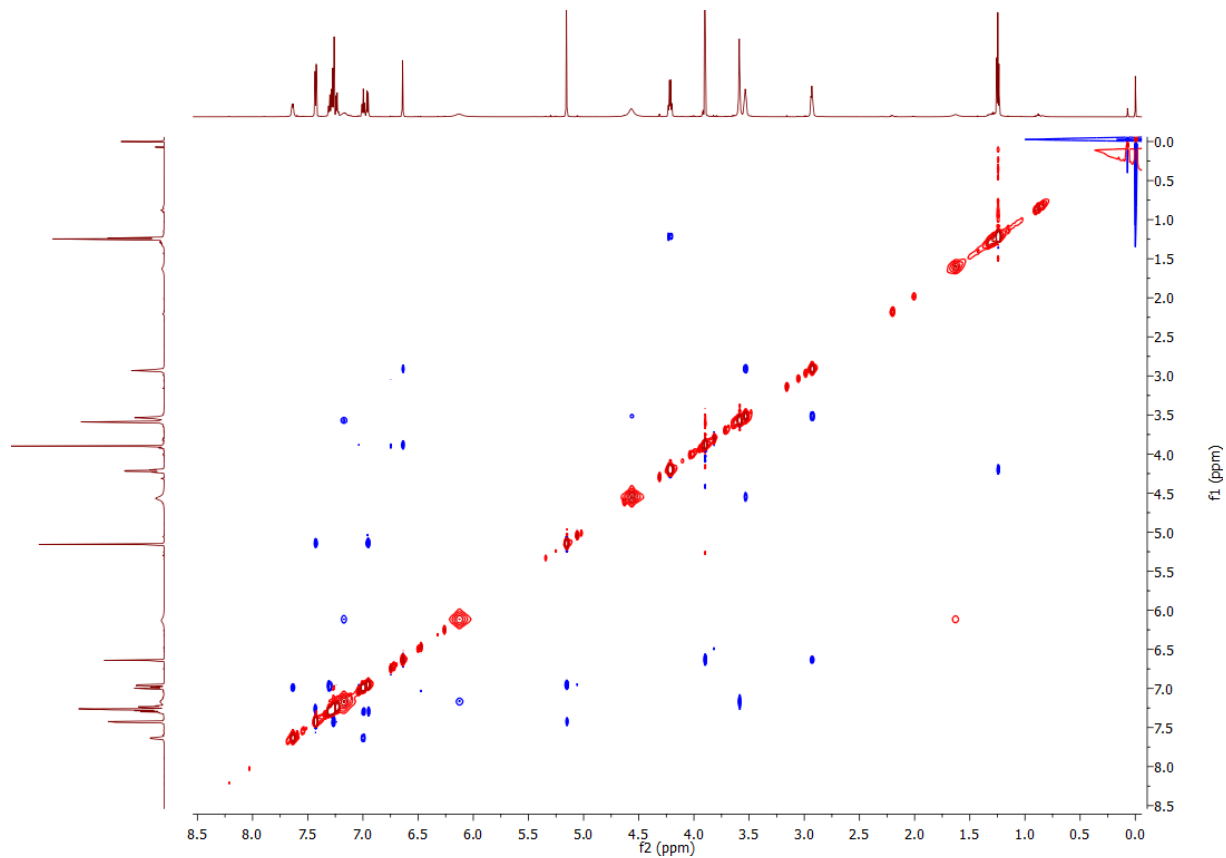

$^1\text{H}$ - $^1\text{H}$  NOESY spectrum of **12b**

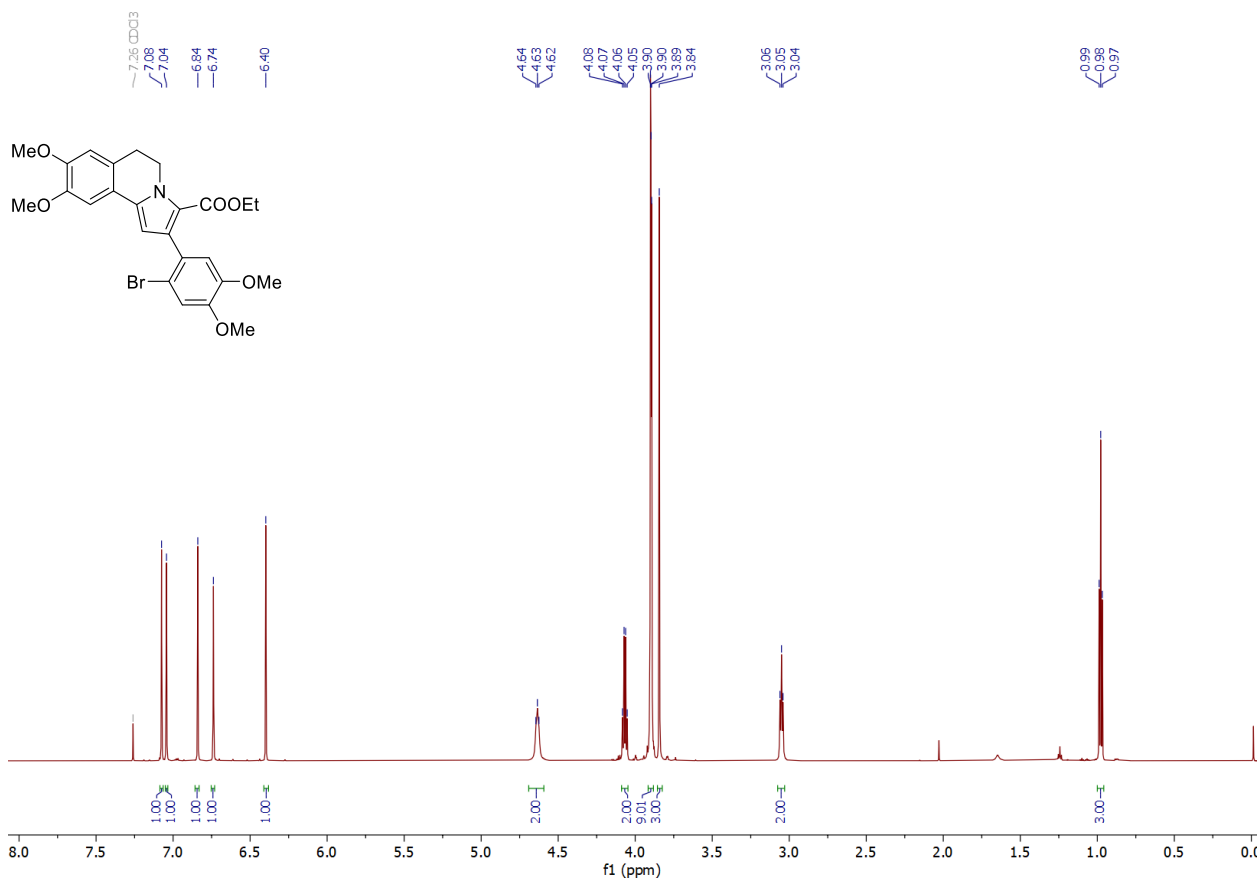

$^1\text{H}$  NMR (700 MHz,  $\text{CDCl}_3$ ) spectrum of **13a**

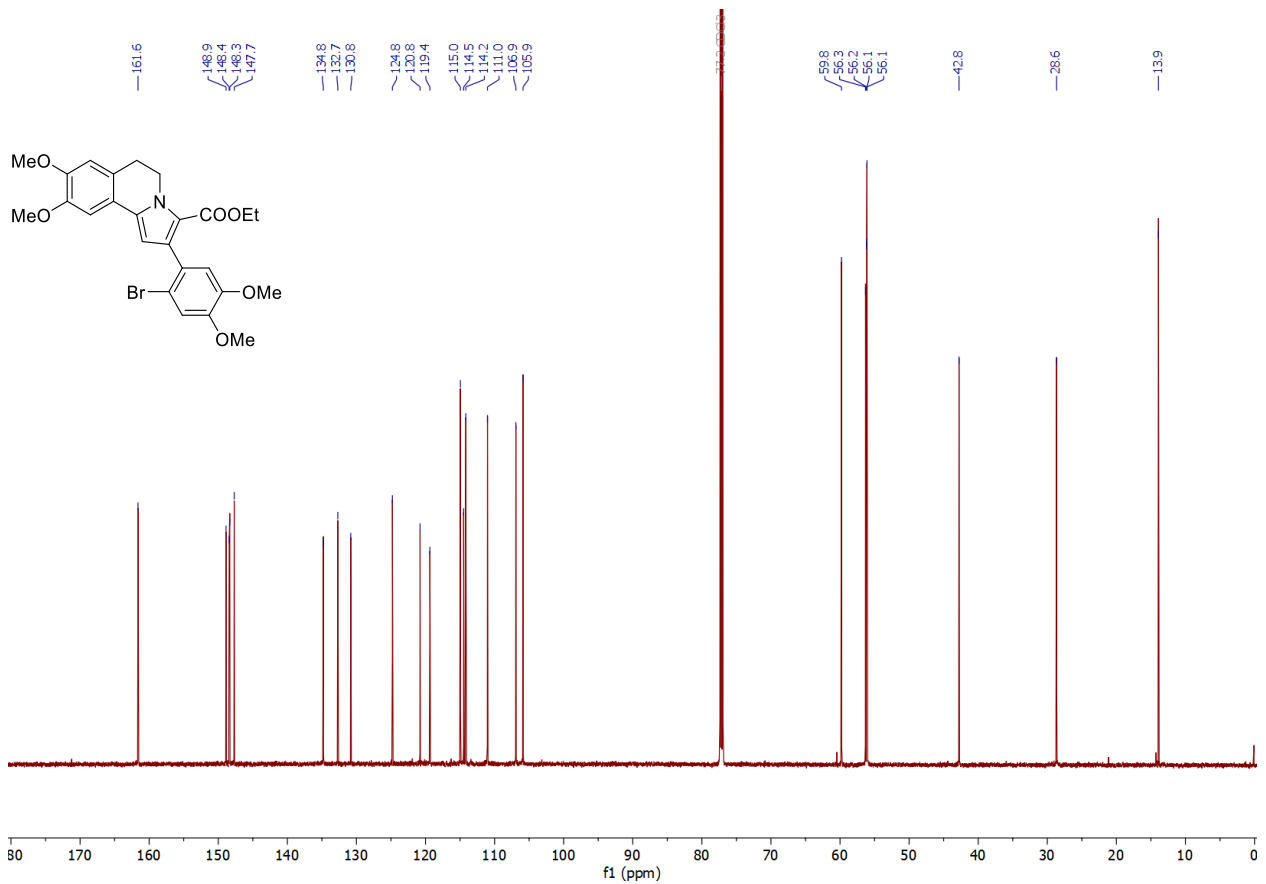

$^{13}\text{C}\{^1\text{H}\}$  NMR (176 MHz,  $\text{CDCl}_3$ ) spectrum of **13a**

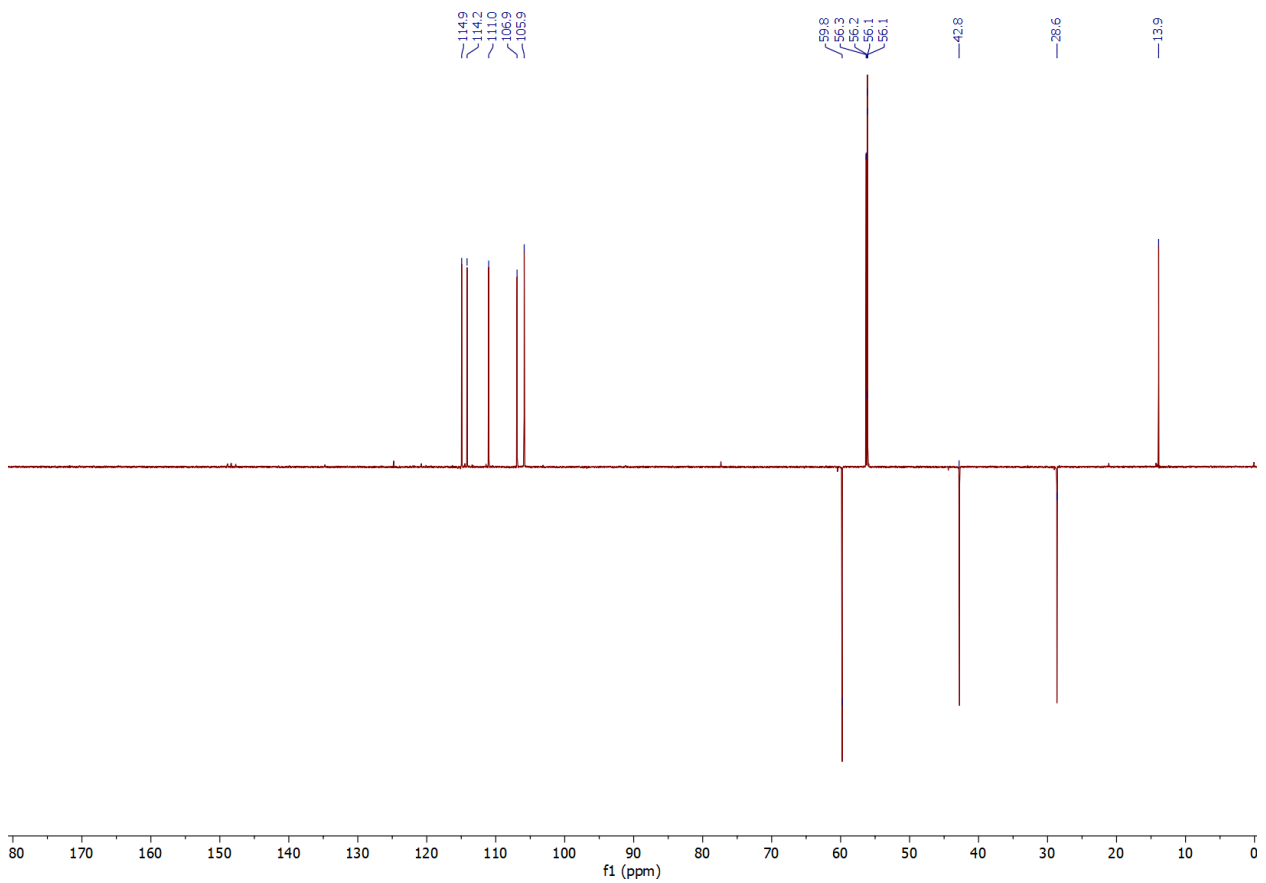

DEPT 135 spectrum of **13a**

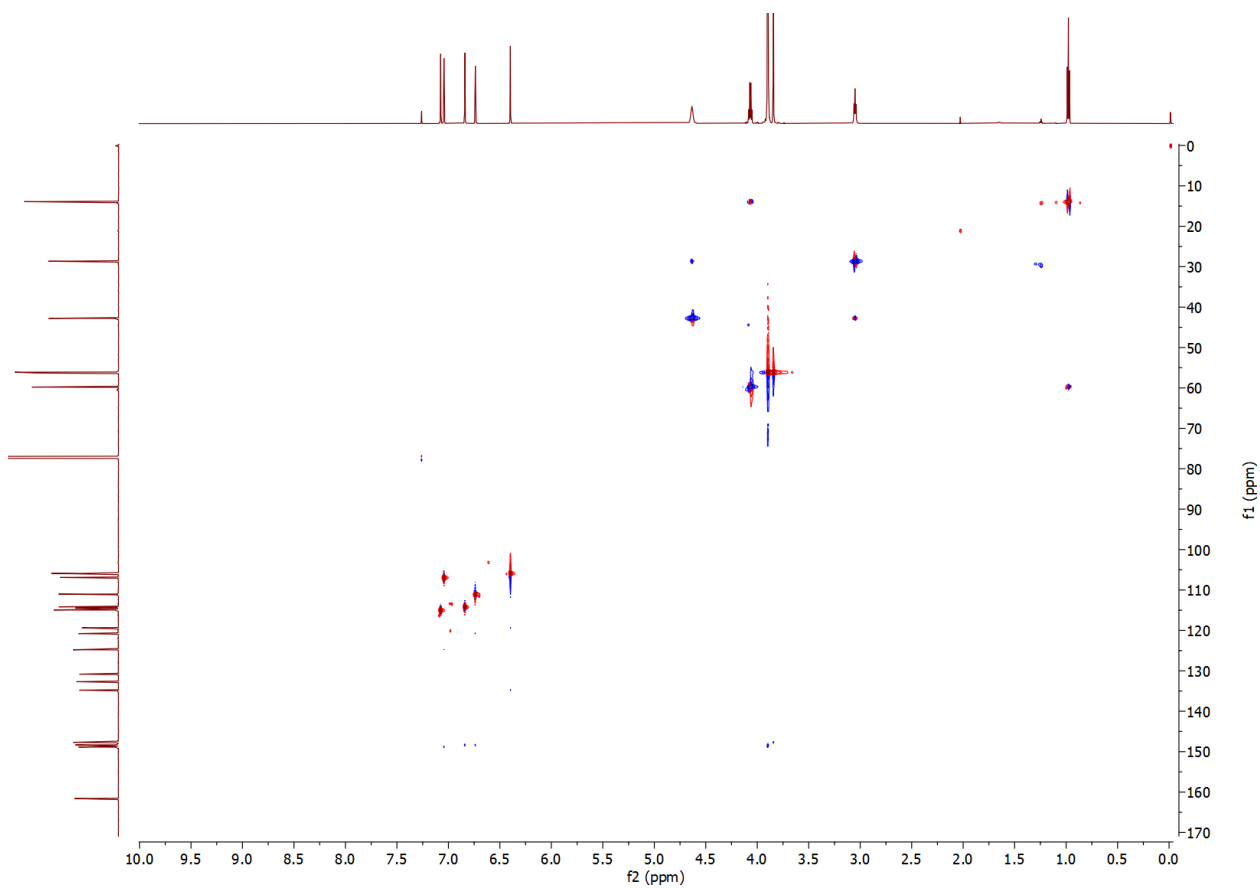

$^1\text{H}$ - $^{13}\text{C}$  HSQC spectrum of 13a

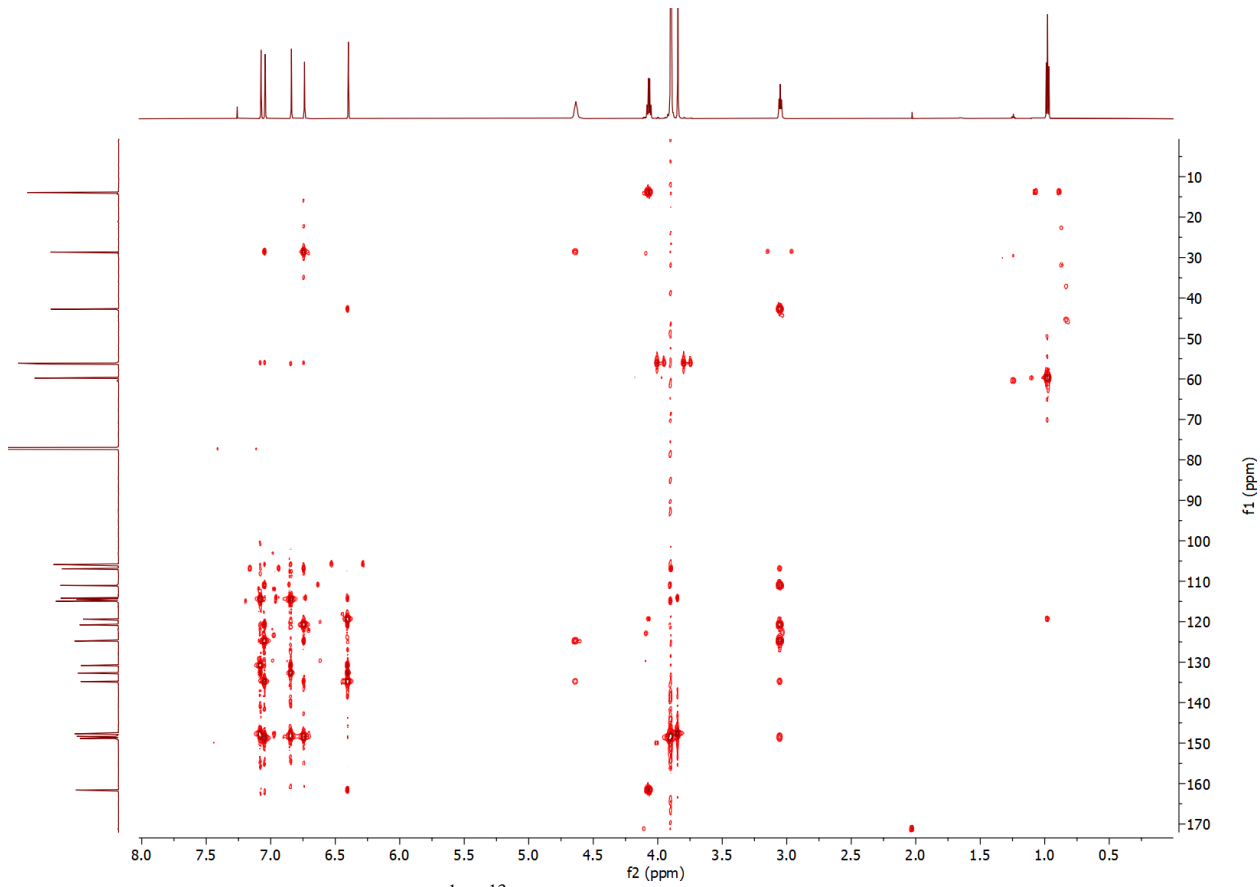

$^1\text{H}$ - $^{13}\text{C}$  HMBC spectrum of 13a



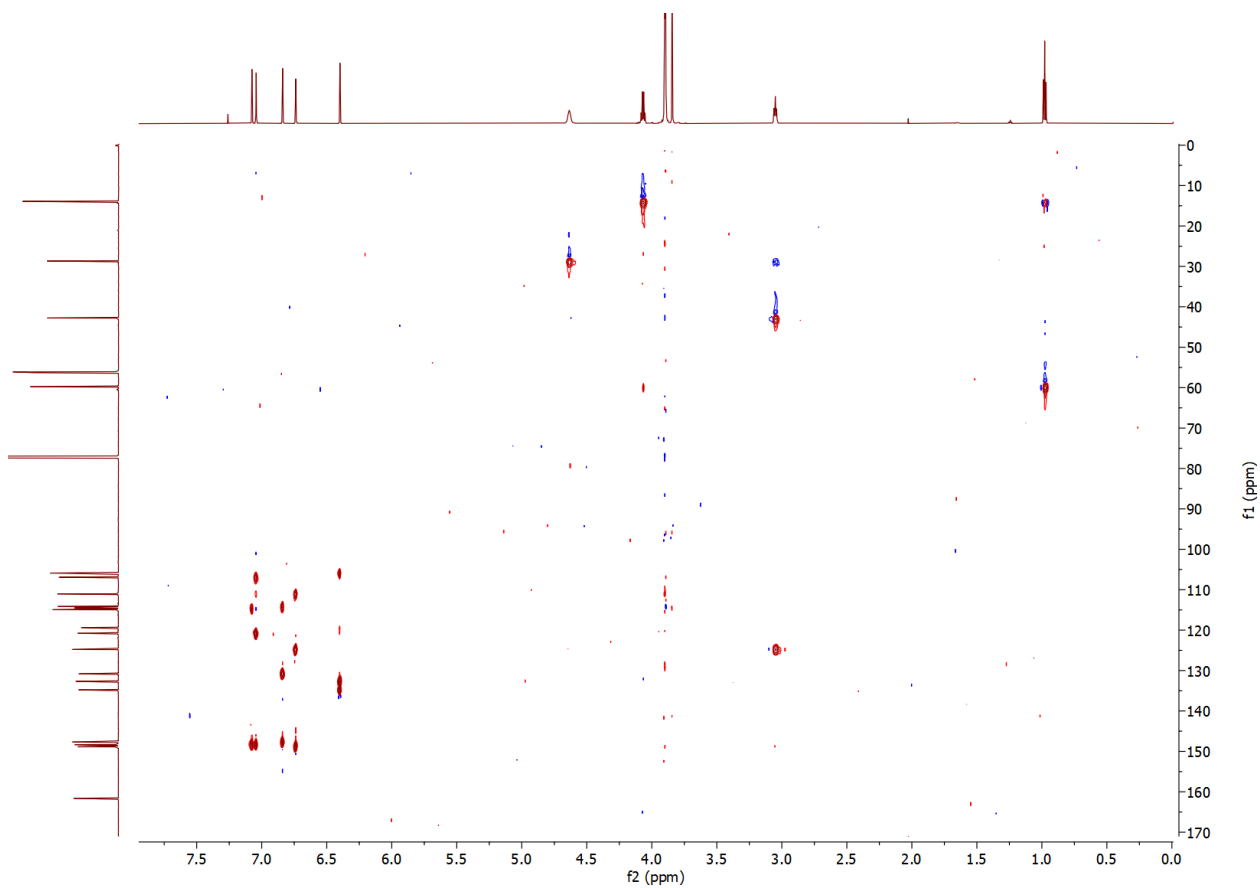

1,1-ADEQUATE spectrum of **13a**

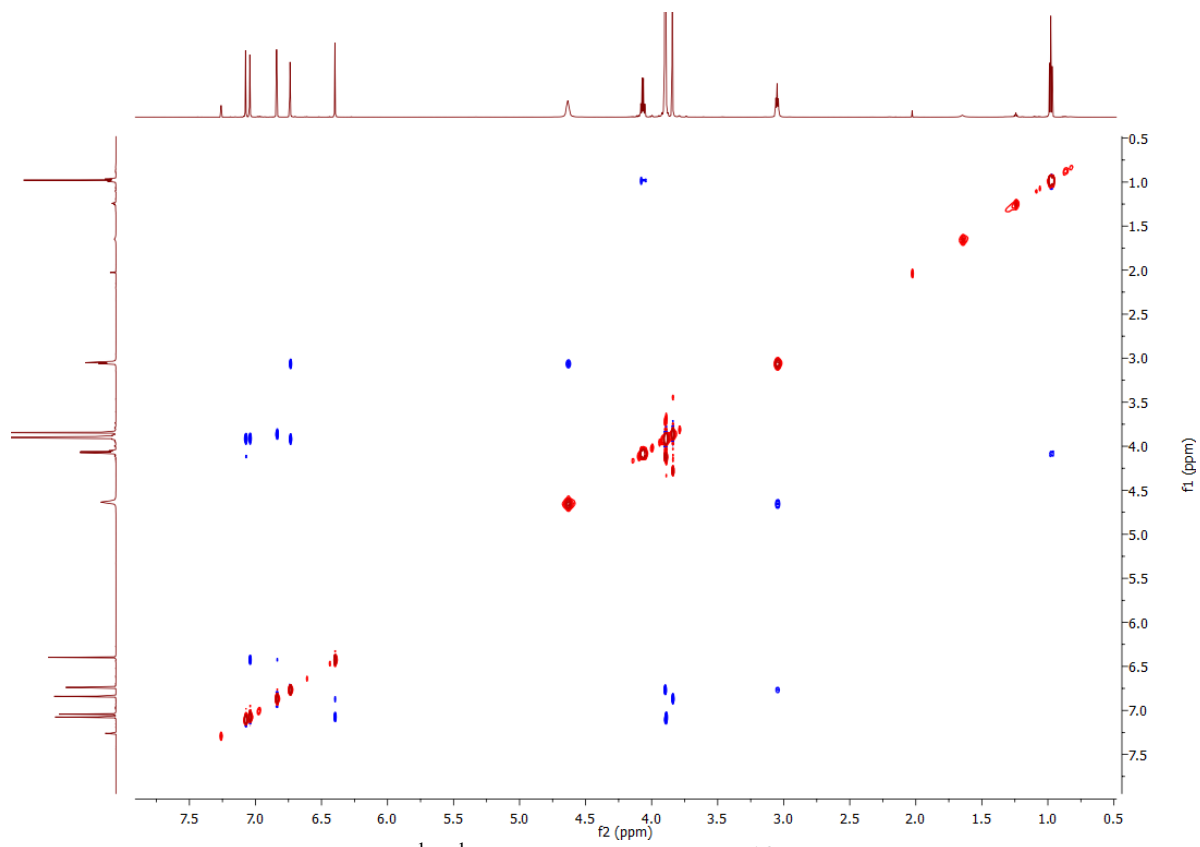

<sup>1</sup>H-<sup>1</sup>H NOESY spectrum of **13a**

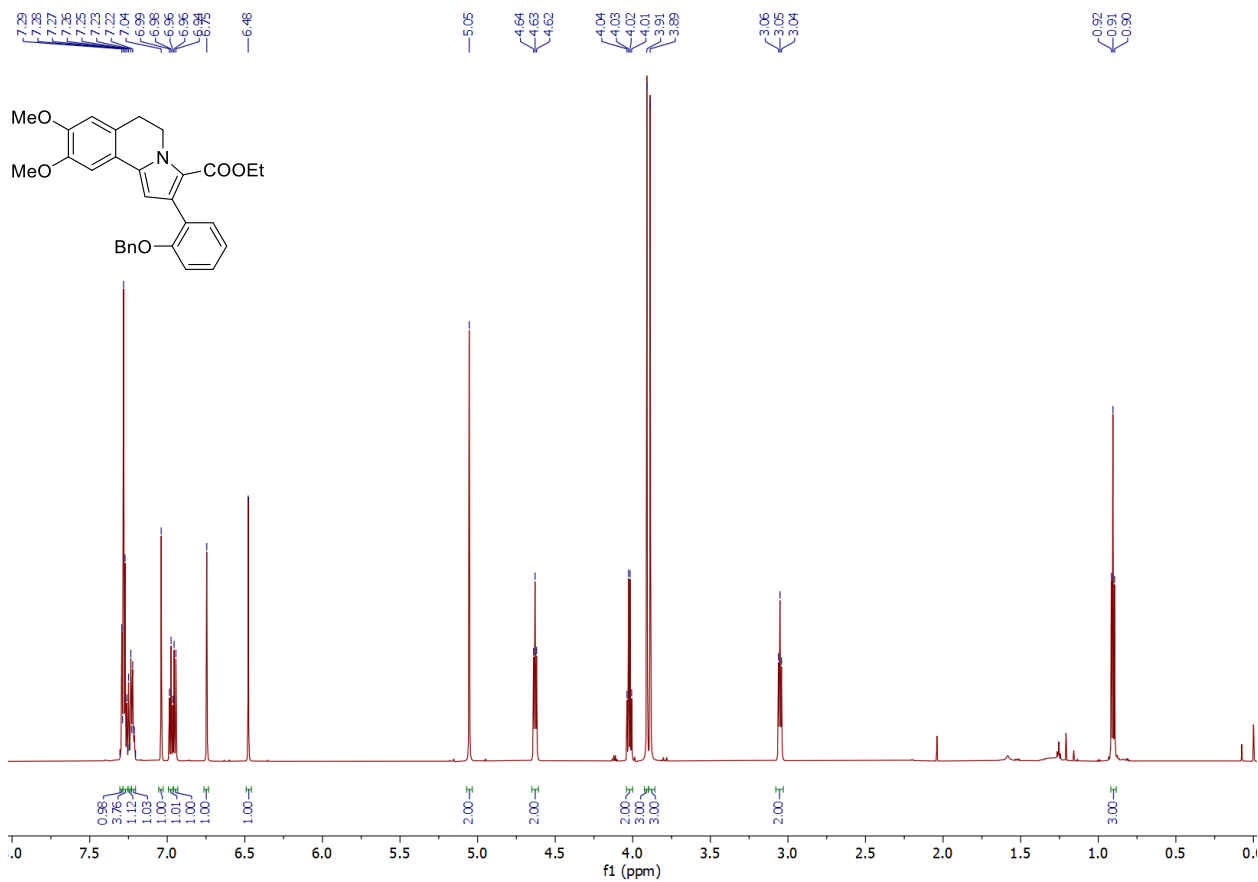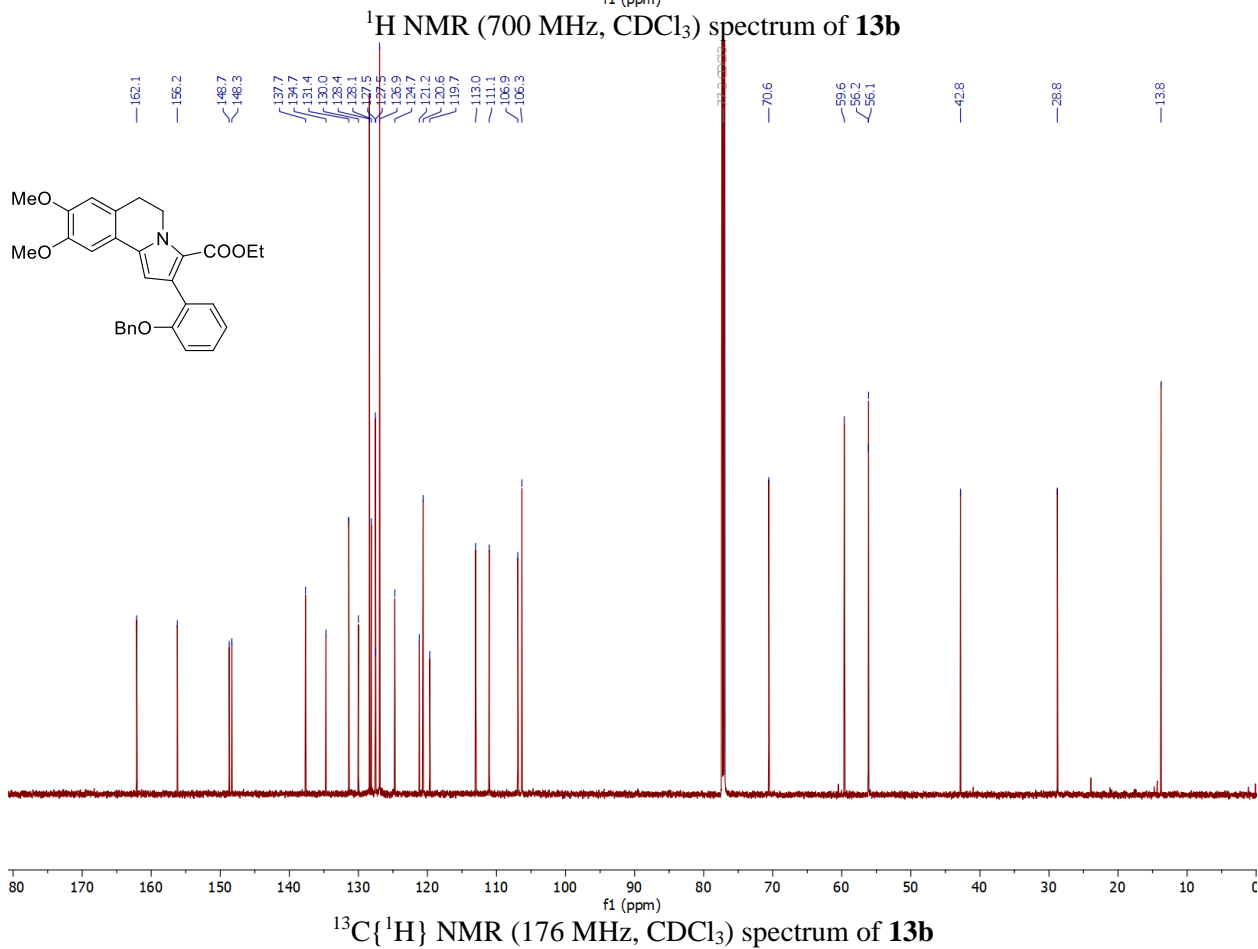

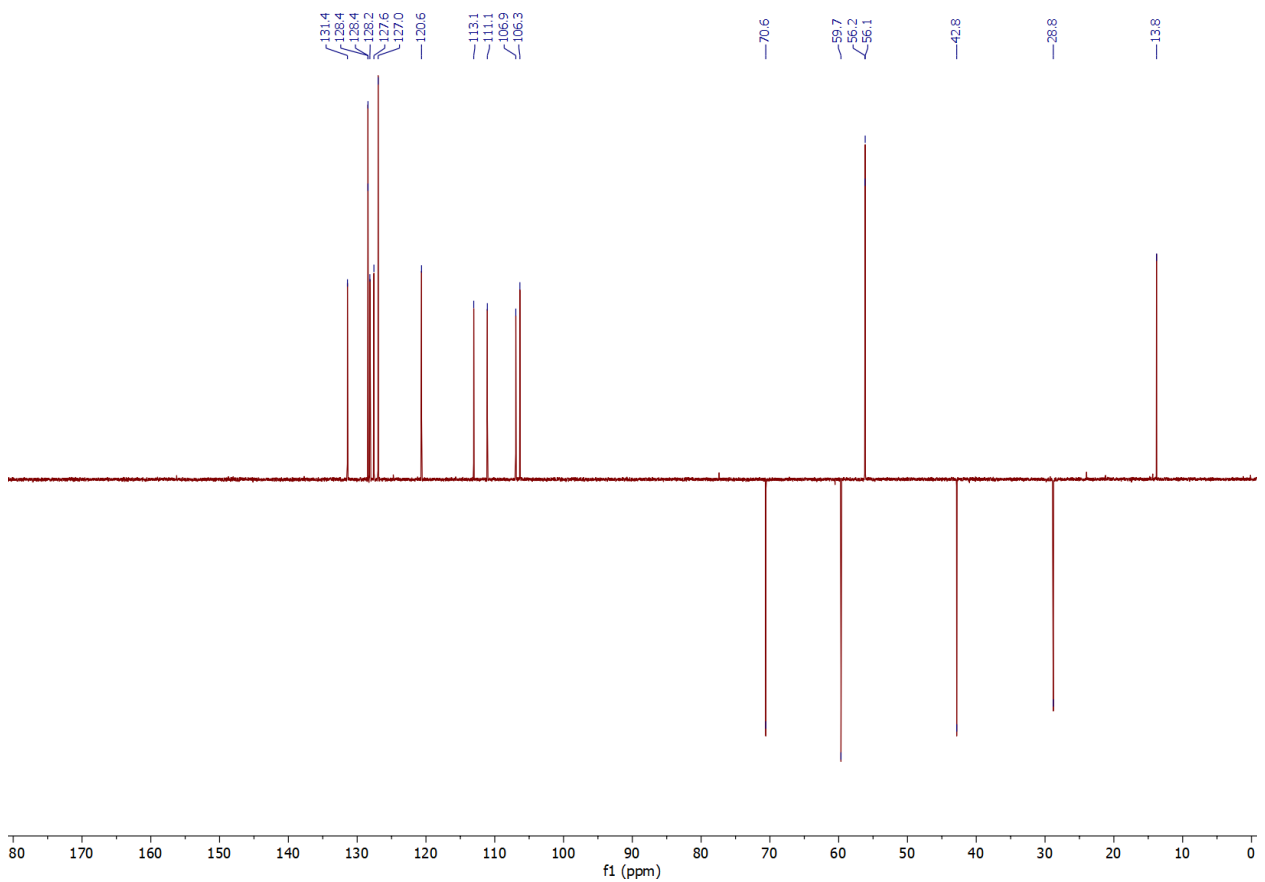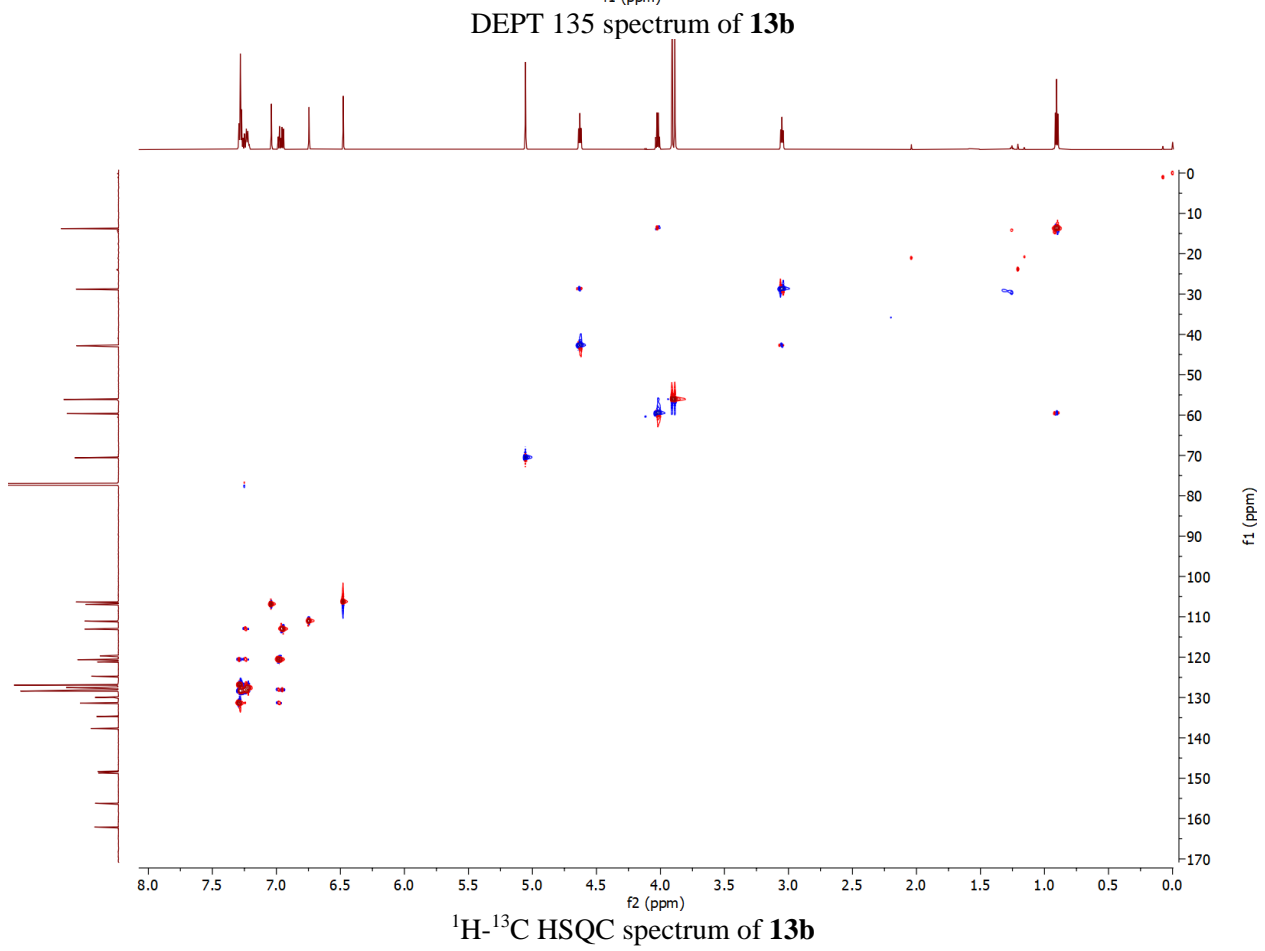

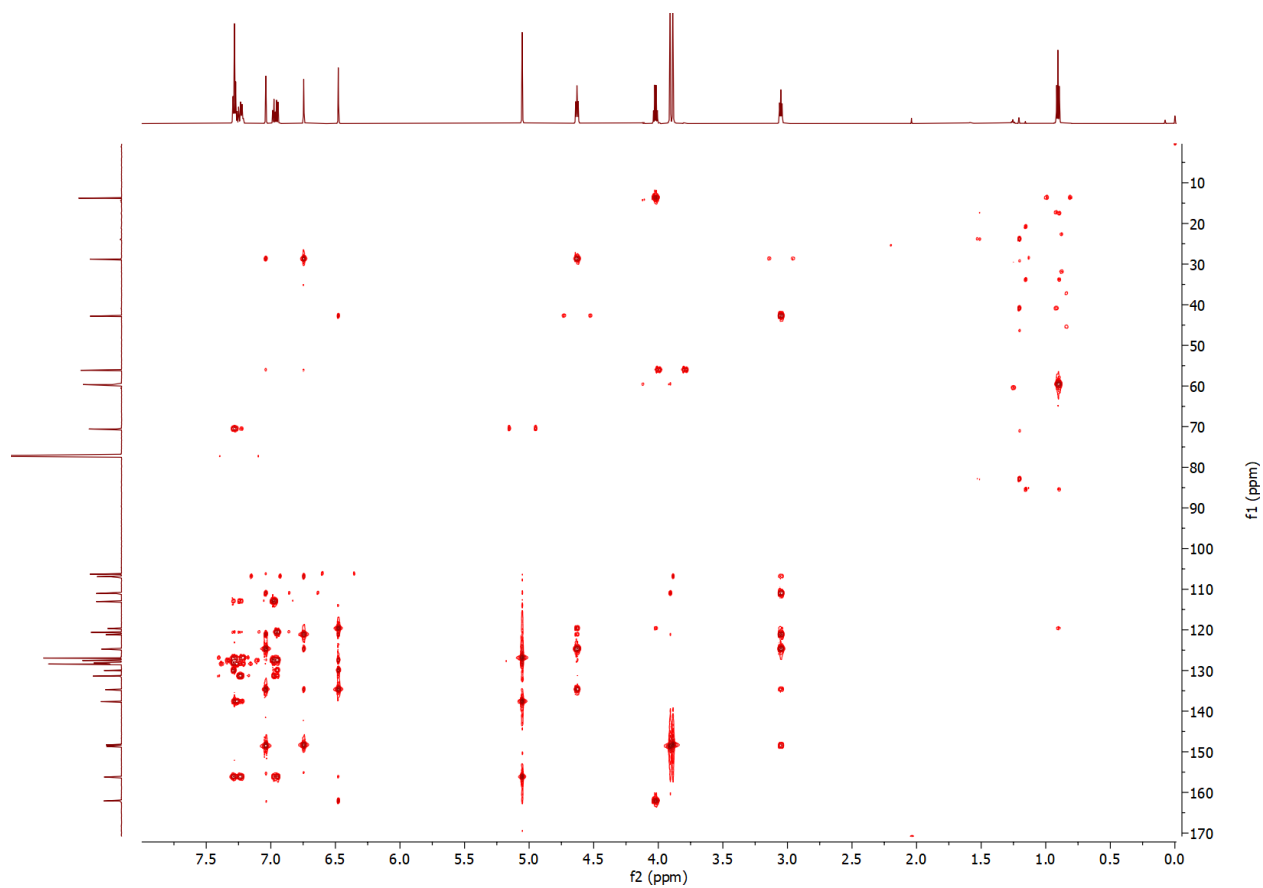

$^1\text{H}$ - $^{13}\text{C}$  HMBC spectrum of **13b**

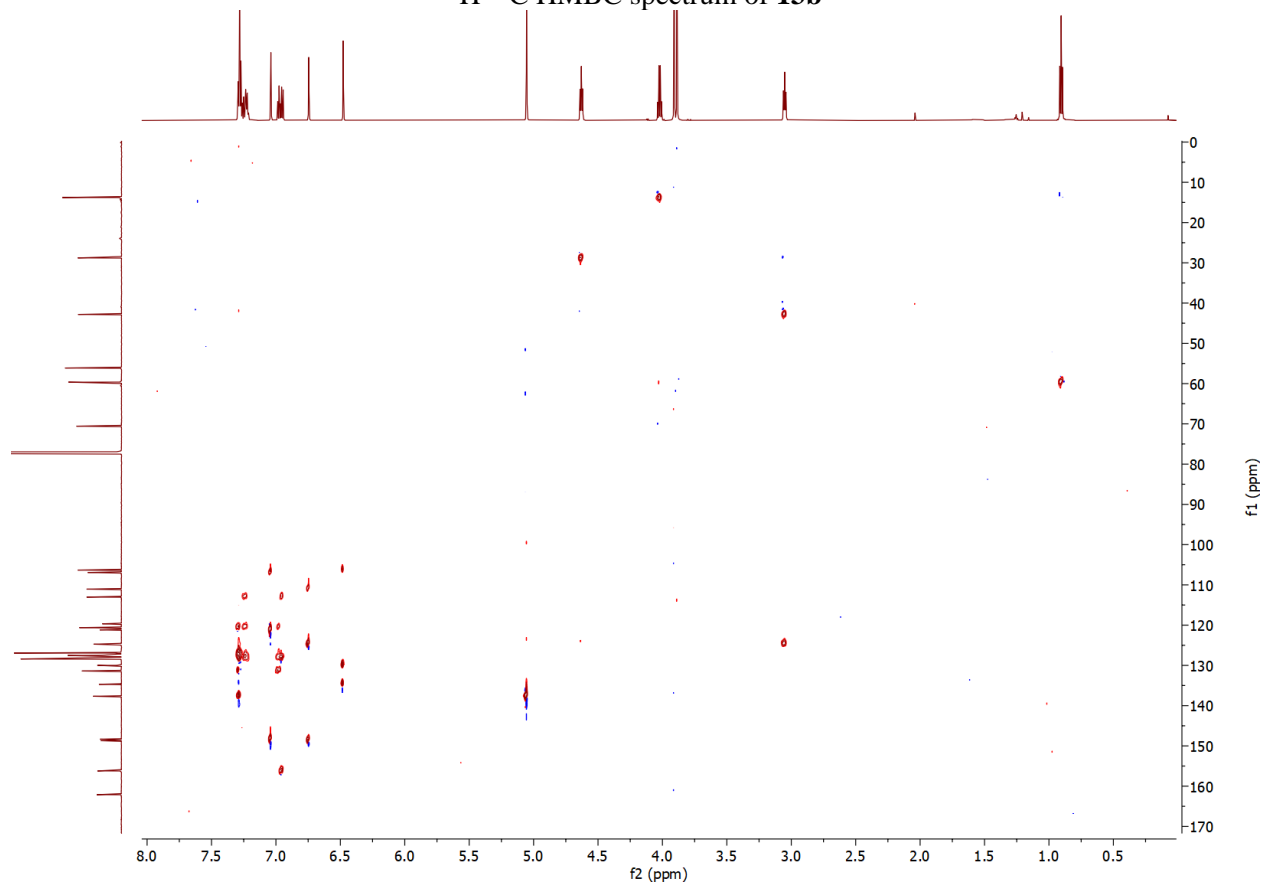

1,1-ADEQUATE spectrum of **13b**

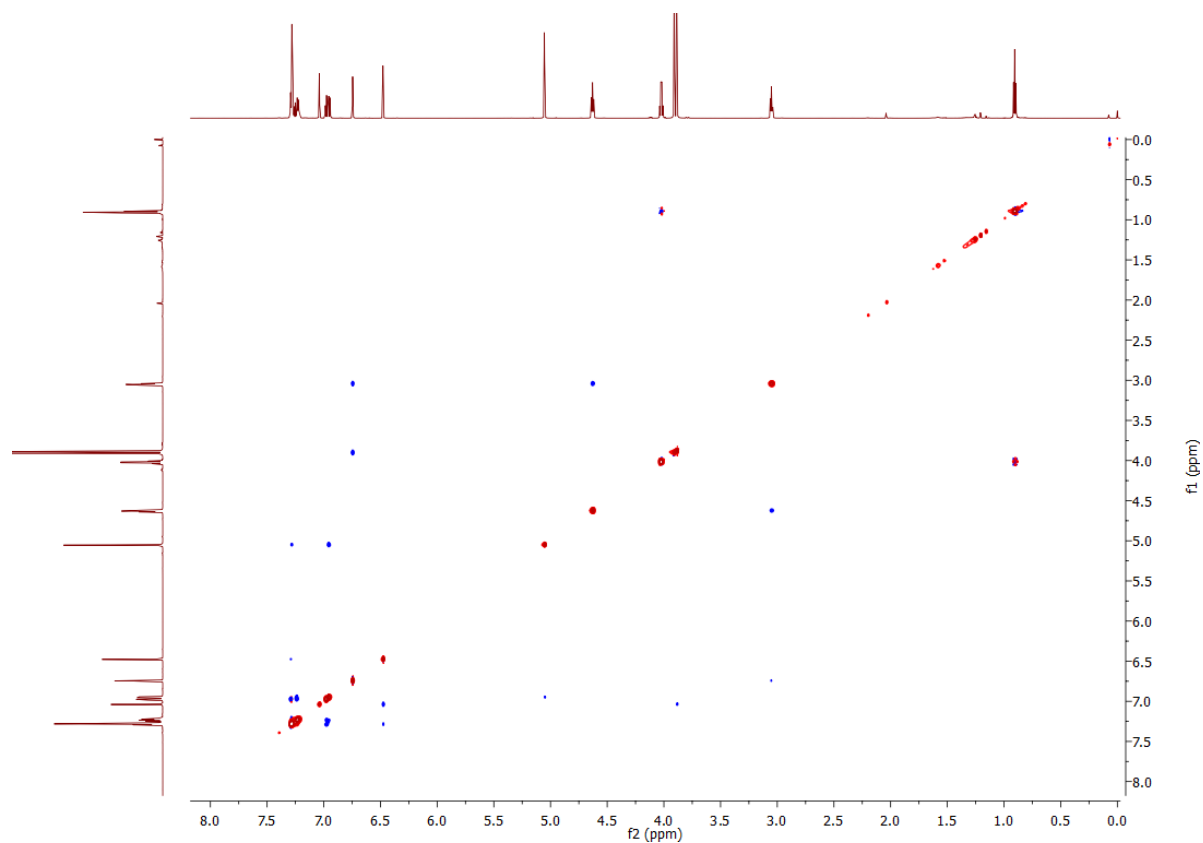

$^1\text{H}$ - $^1\text{H}$  NOESY spectrum of **13b**

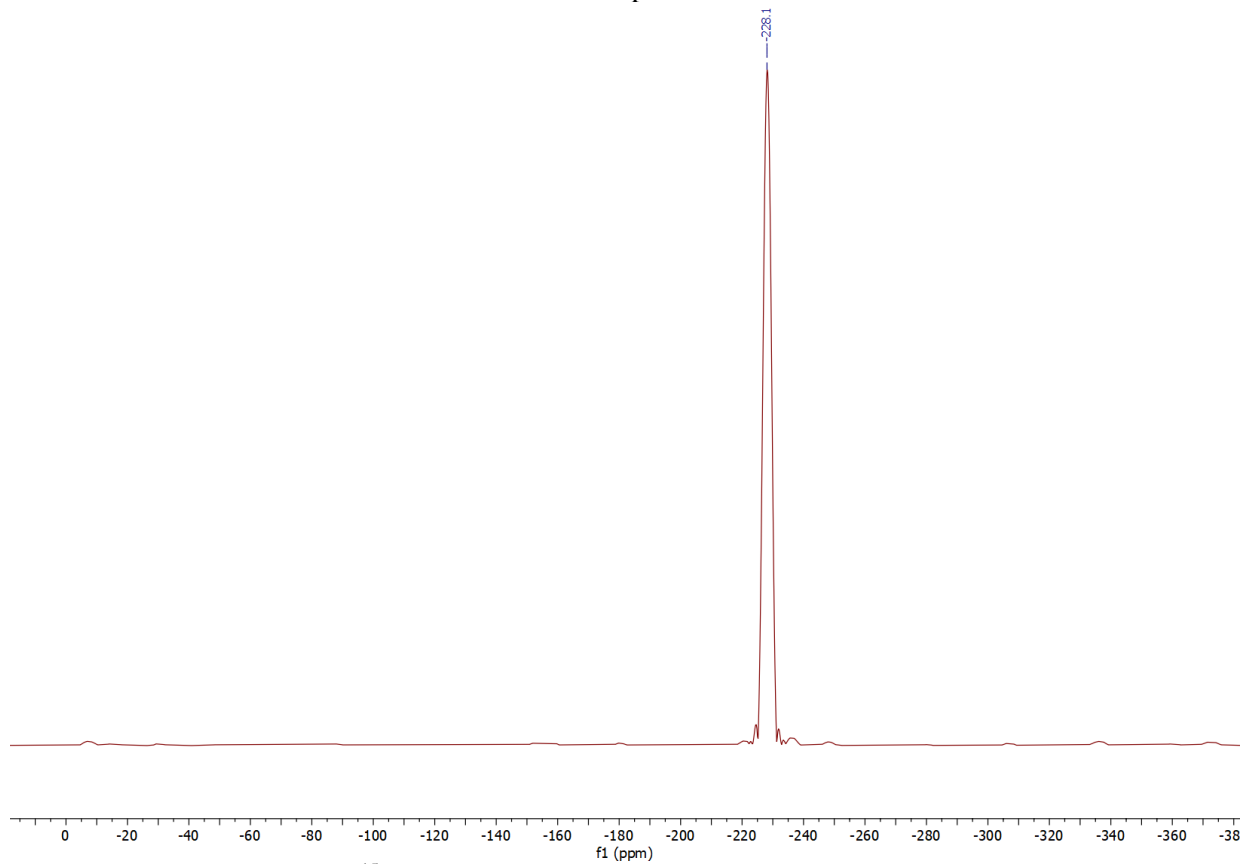

$^{15}\text{N}$  NMR (71 MHz,  $\text{CDCl}_3$ ) spectrum of **13b**

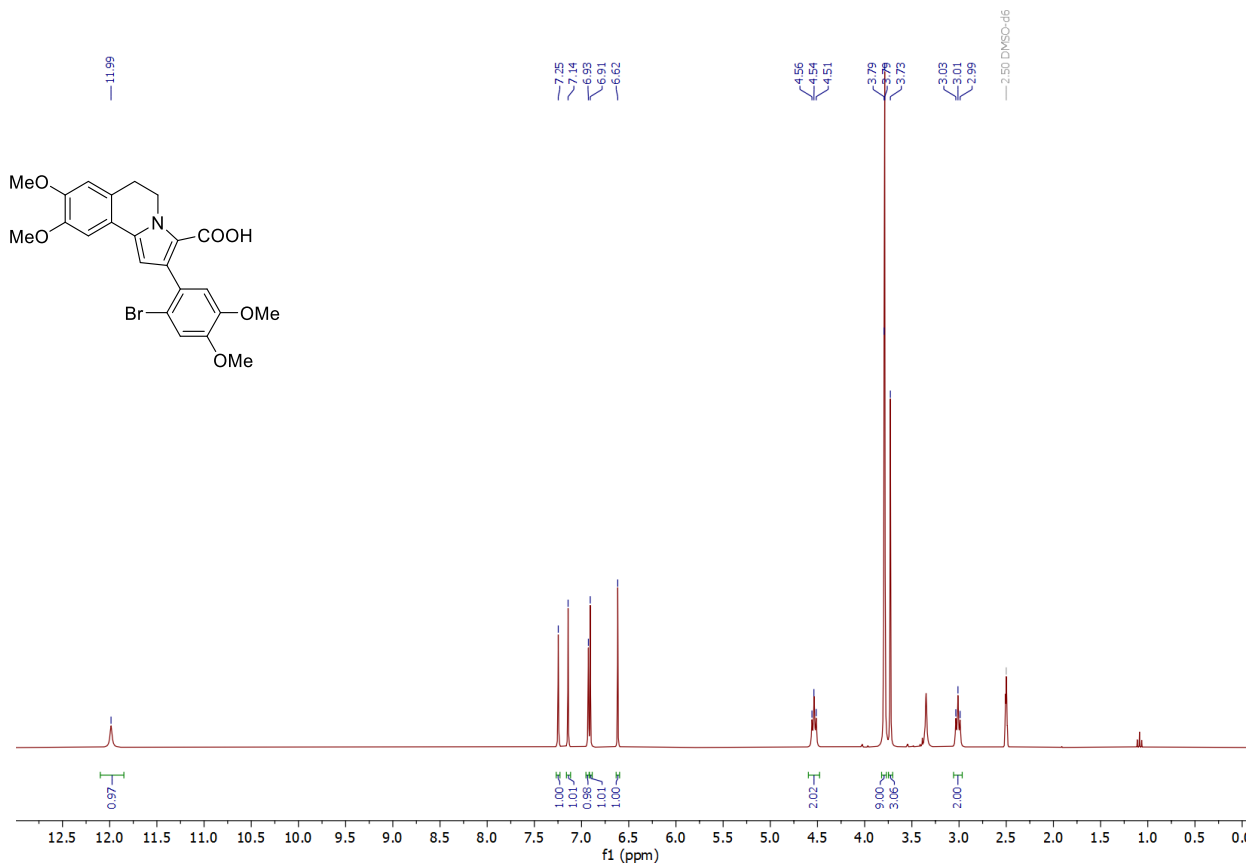

<sup>1</sup>H NMR (300 MHz, DMSO-*d*<sub>6</sub>) spectrum of intermediate 2-(2-bromo-4,5-dimethoxyphenyl)-8,9-dimethoxy-5,6-dihydropyrrolo[2,1-*a*]isoquinoline-3-carboxylic acid

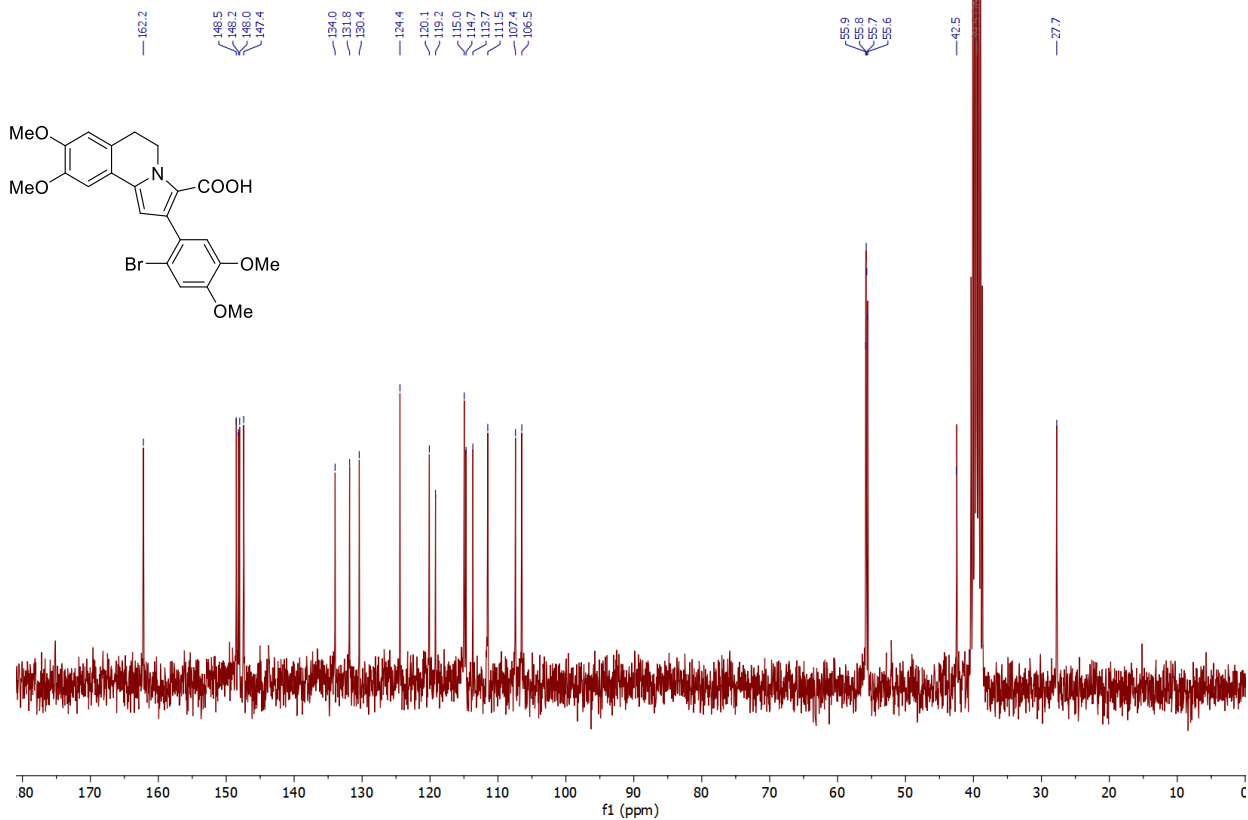

<sup>13</sup>C{<sup>1</sup>H} NMR (75 MHz, DMSO-*d*<sub>6</sub>) spectrum of intermediate 2-(2-bromo-4,5-dimethoxyphenyl)-8,9-dimethoxy-5,6-dihydropyrrolo[2,1-*a*]isoquinoline-3-carboxylic acid

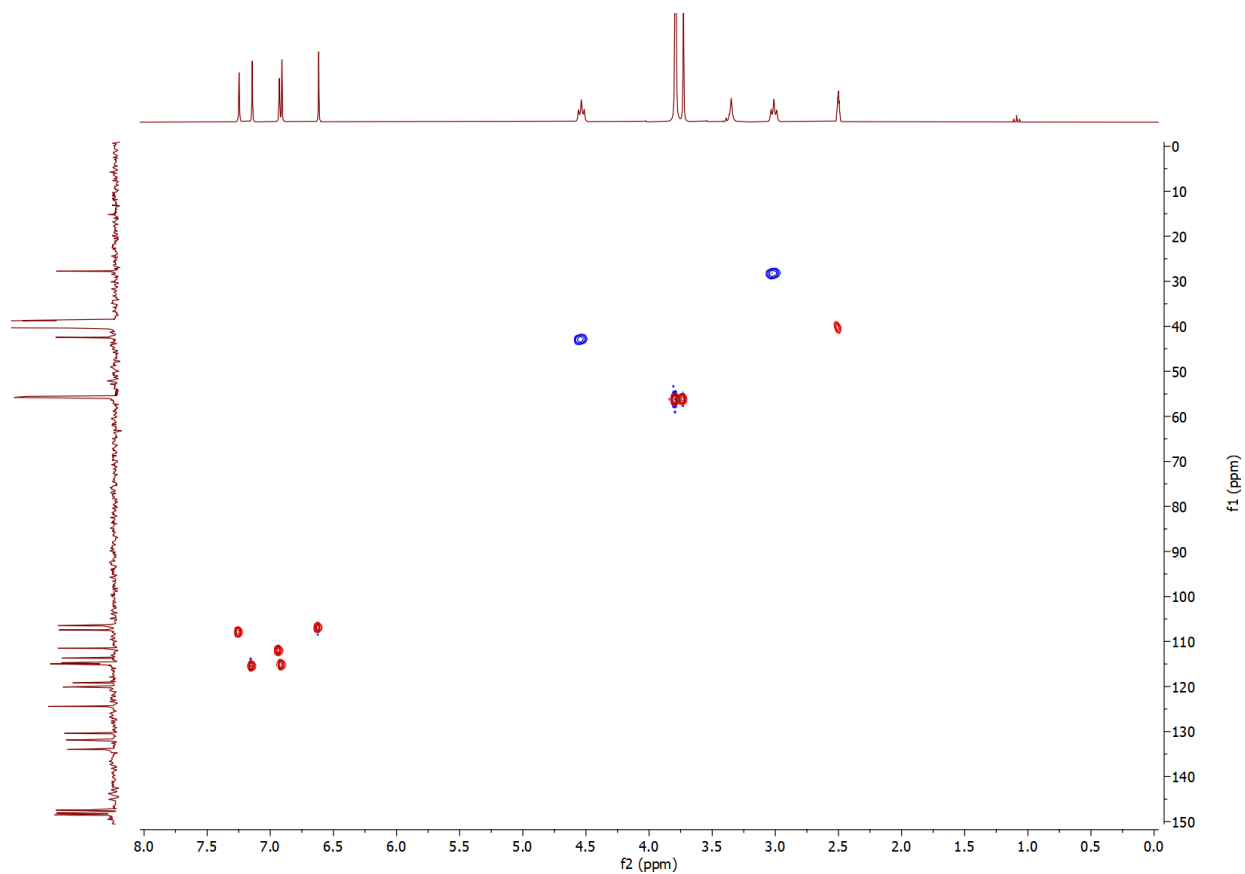

$^1\text{H}$ - $^{13}\text{C}$  HSQC spectrum of intermediate 2-(2-bromo-4,5-dimethoxyphenyl)-8,9-dimethoxy-5,6-dihydropyrrolo[2,1-*a*]isoquinoline-3-carboxylic acid

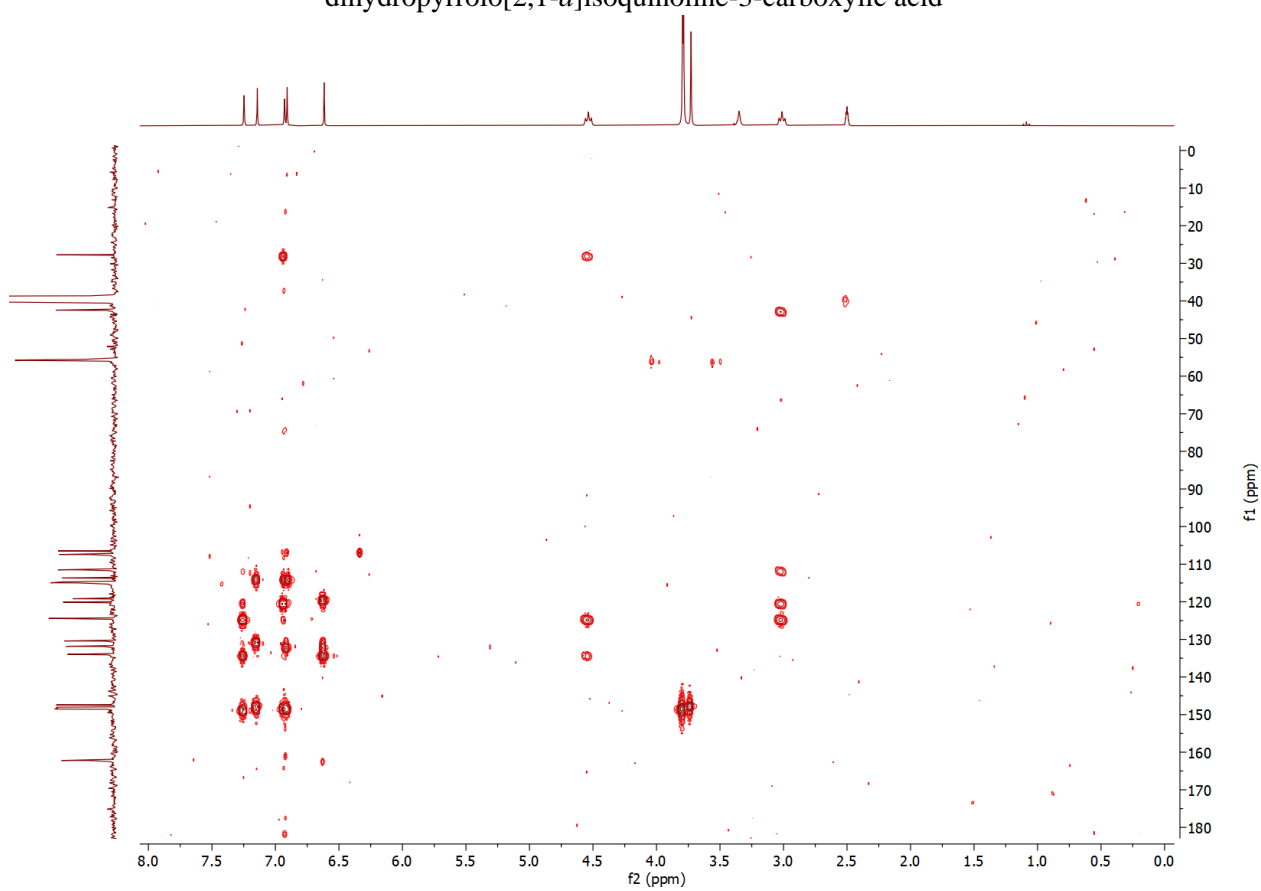

$^1\text{H}$ - $^{13}\text{C}$  HMBC spectrum of intermediate 2-(2-bromo-4,5-dimethoxyphenyl)-8,9-dimethoxy-5,6-dihydropyrrolo[2,1-*a*]isoquinoline-3-carboxylic acid

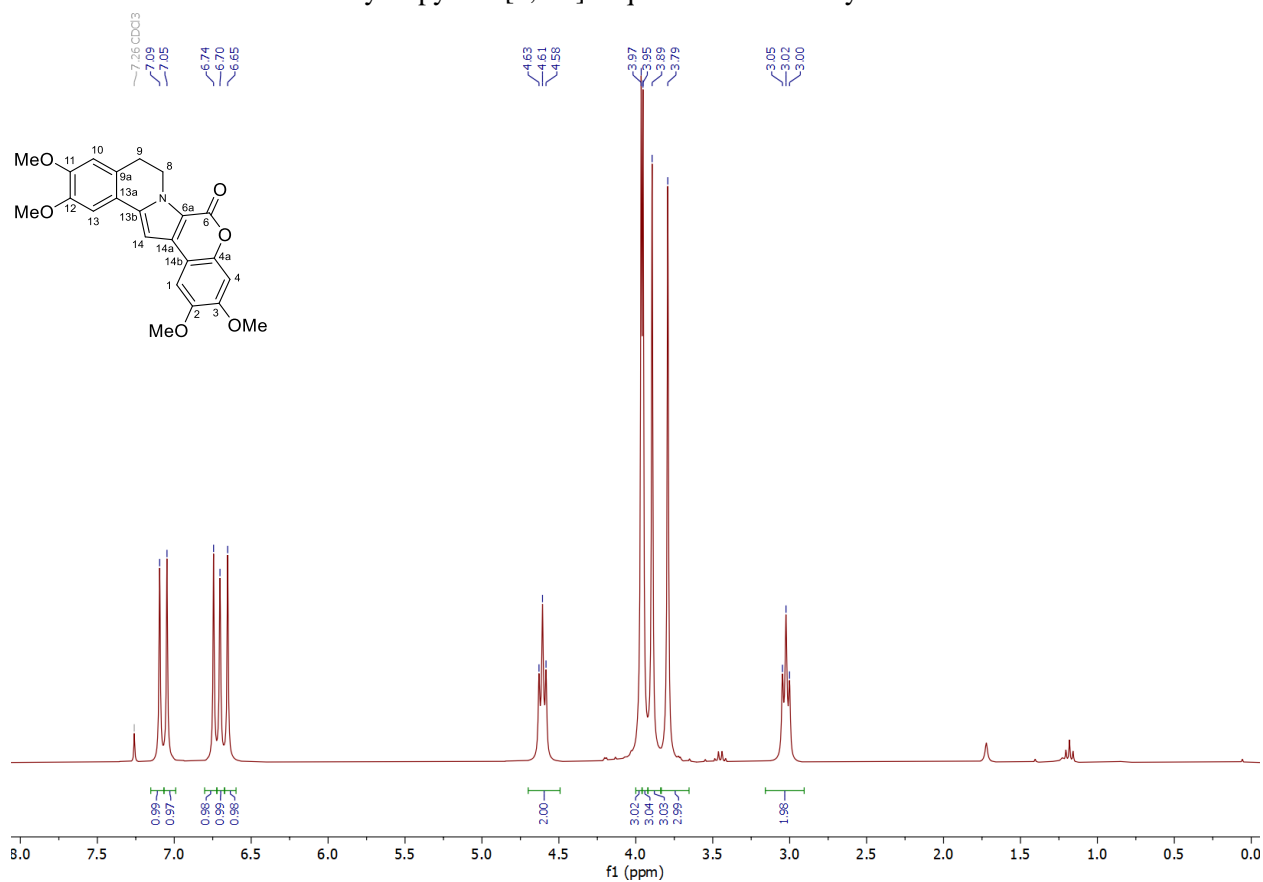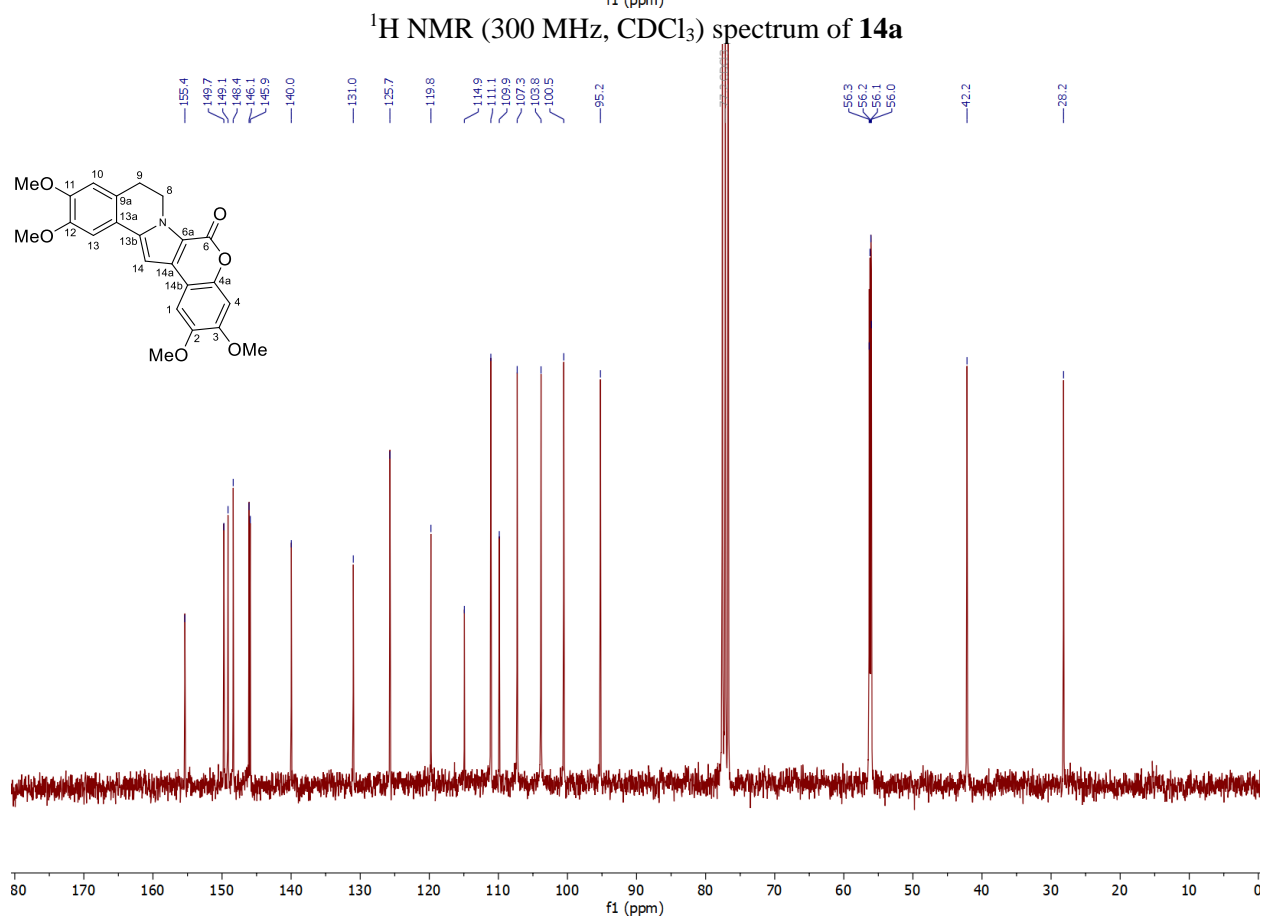



$^{13}\text{C}\{^1\text{H}\}$  NMR (75 MHz,  $\text{CDCl}_3$ ) spectrum of **14a**

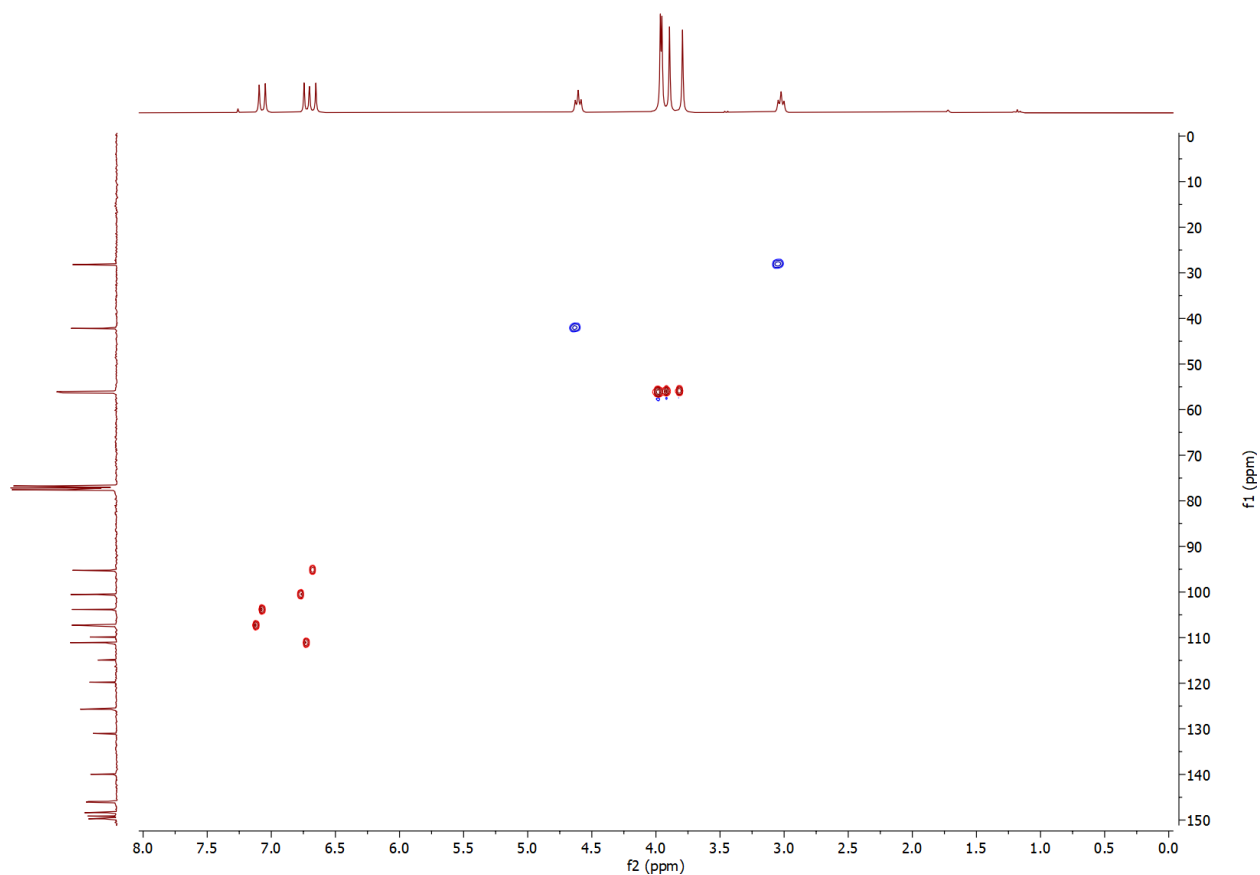

$^1\text{H}-^{13}\text{C}$  HSQC spectrum of **14a**

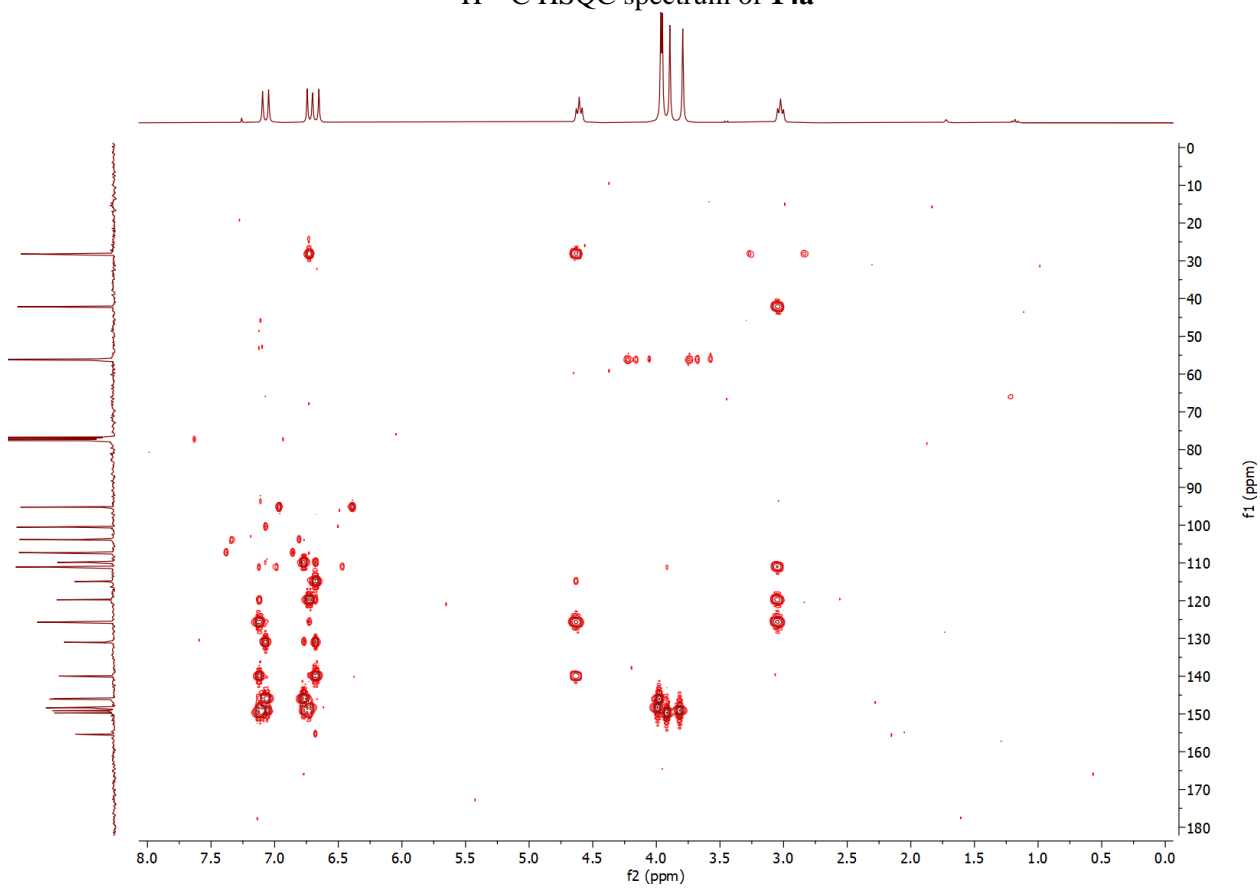



$^{13}\text{C}\{^1\text{H}\}$  NMR (75 MHz,  $\text{CDCl}_3$ ) spectrum of **14b**

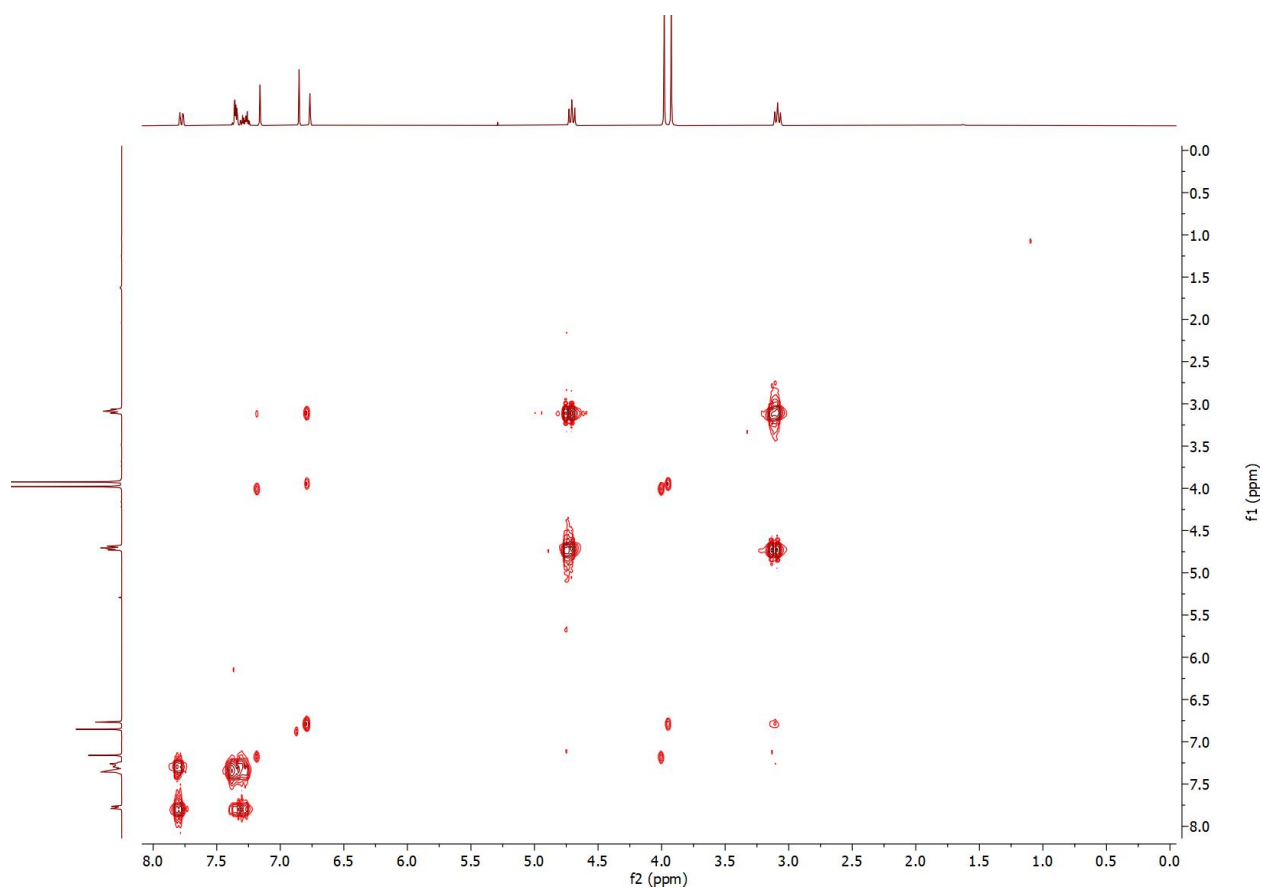

$^1\text{H}$ - $^1\text{H}$  COSY spectrum of **14b**

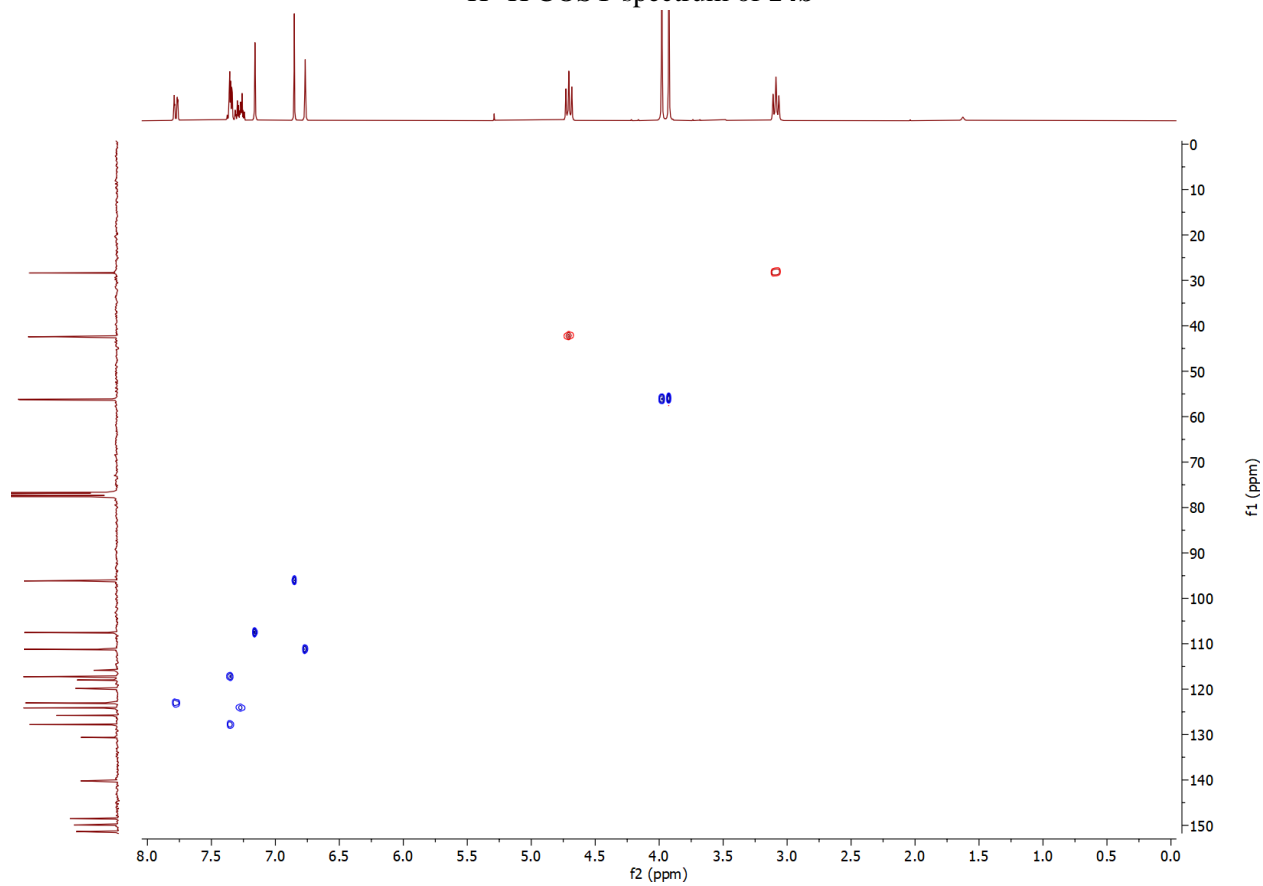

$^1\text{H}$ - $^{13}\text{C}$  HSQC spectrum of **14b**

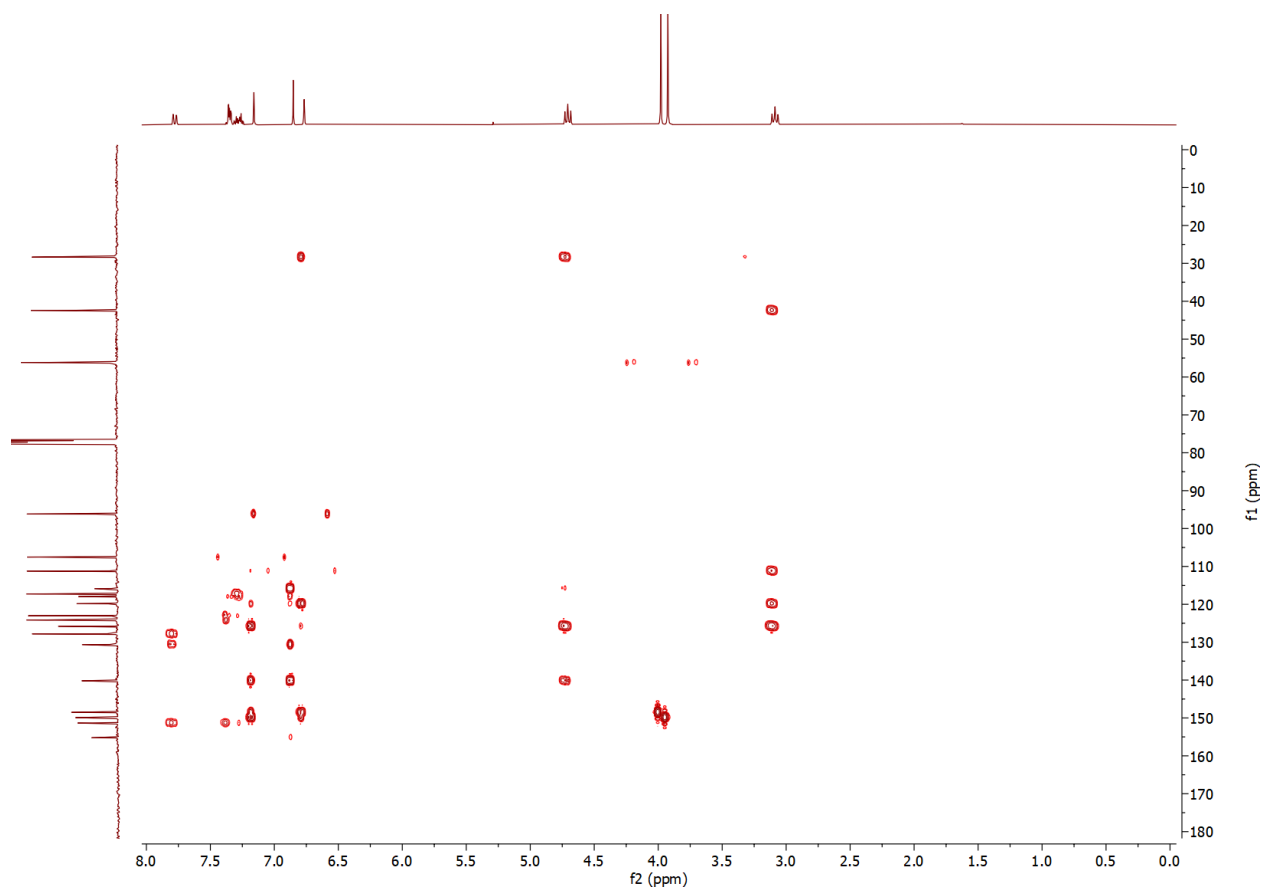

$^1\text{H}$ - $^{13}\text{C}$  HMBC spectrum of **14b**

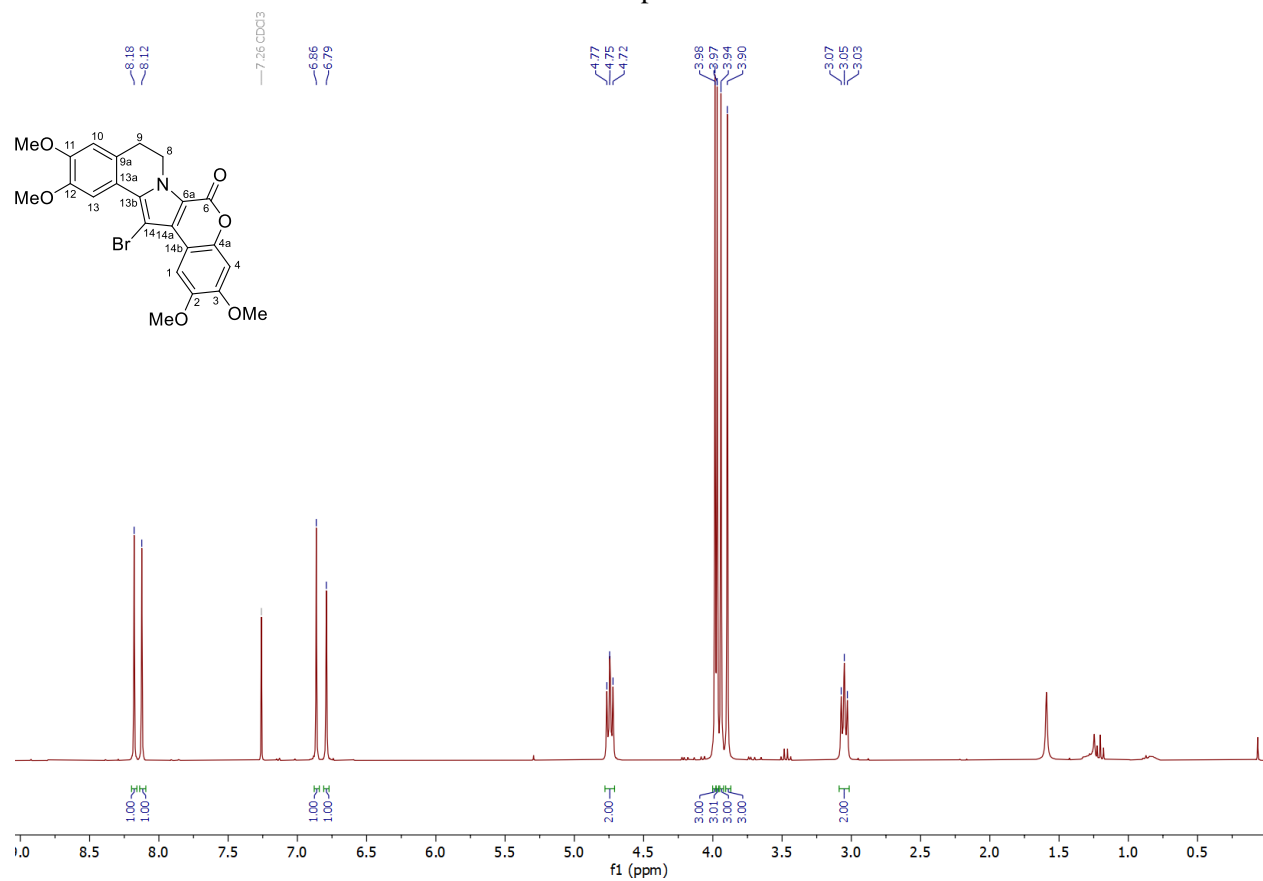

$^1\text{H}$  NMR (300 MHz,  $\text{CDCl}_3$ ) spectrum of **15a**

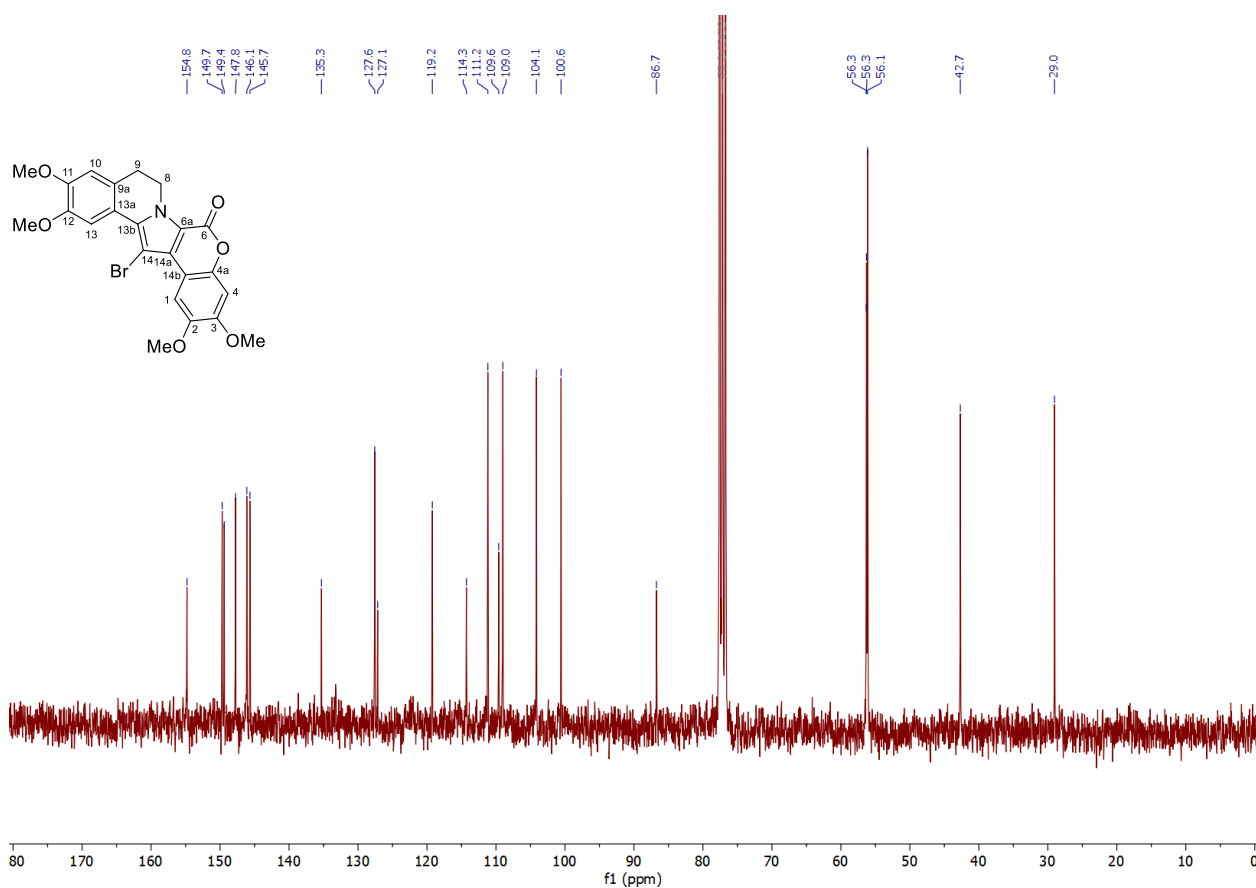

$^{13}\text{C}\{^1\text{H}\}$  NMR (75 MHz,  $\text{CDCl}_3$ ) spectrum of **15a**

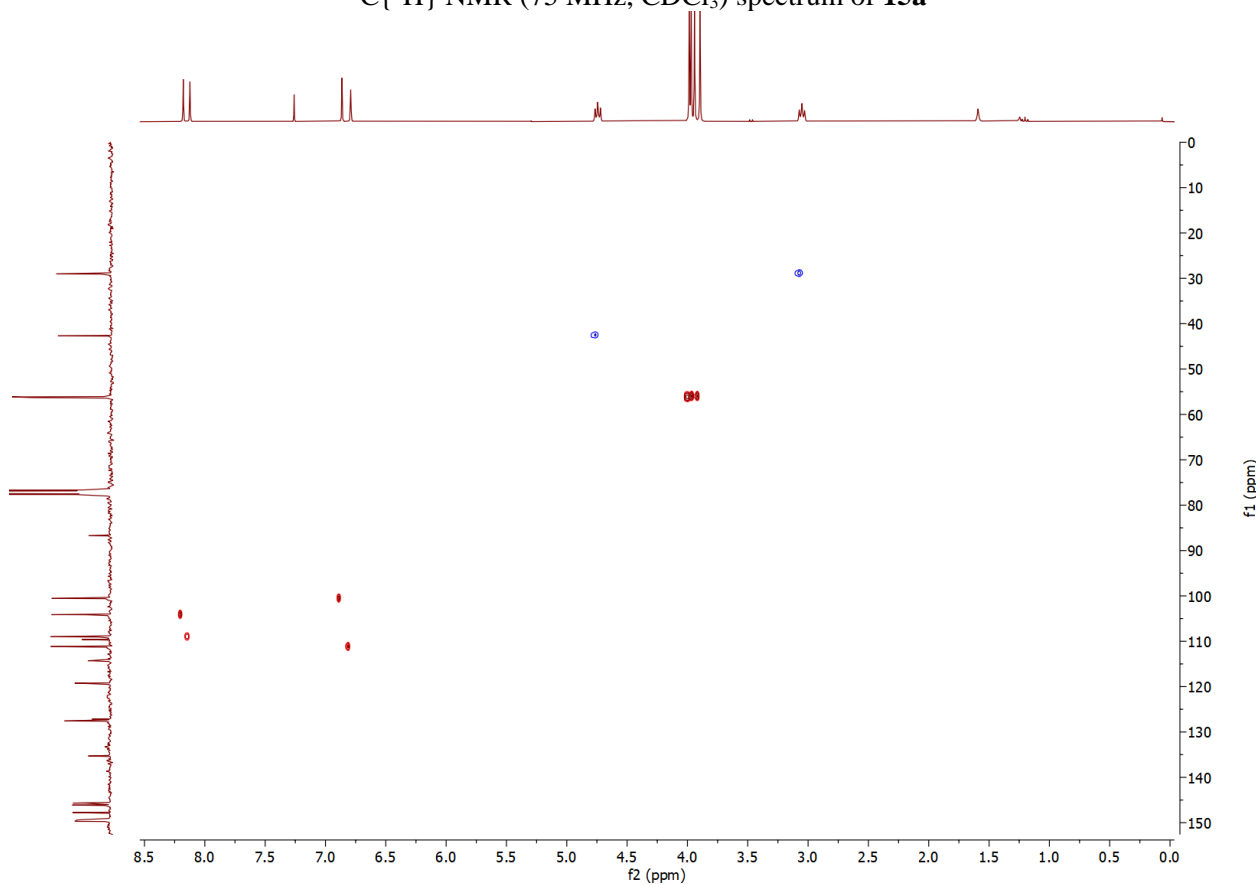

$^1\text{H}$ - $^{13}\text{C}$  HSQC spectrum of **15a**

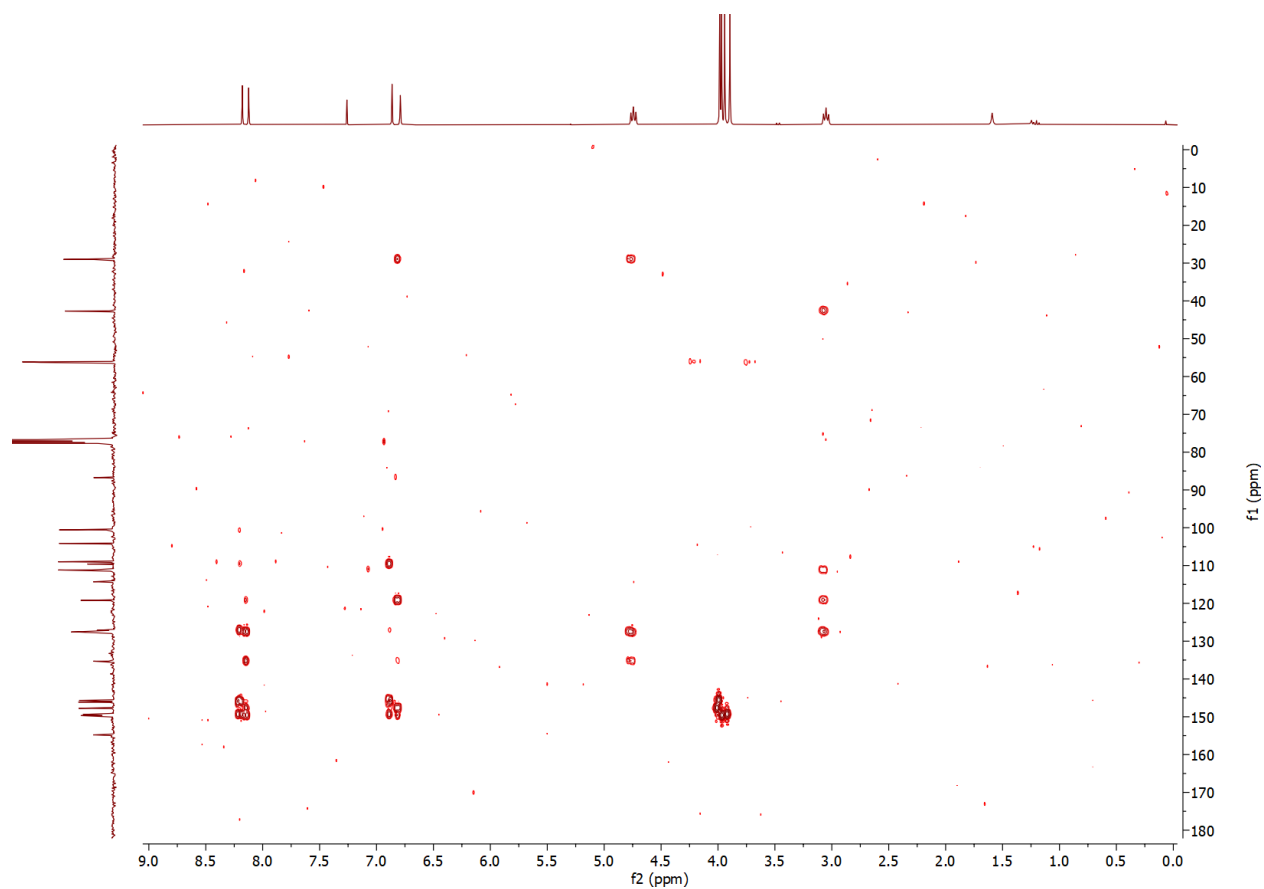

$^1\text{H}$ - $^{13}\text{C}$  HMBC spectrum of **15a**

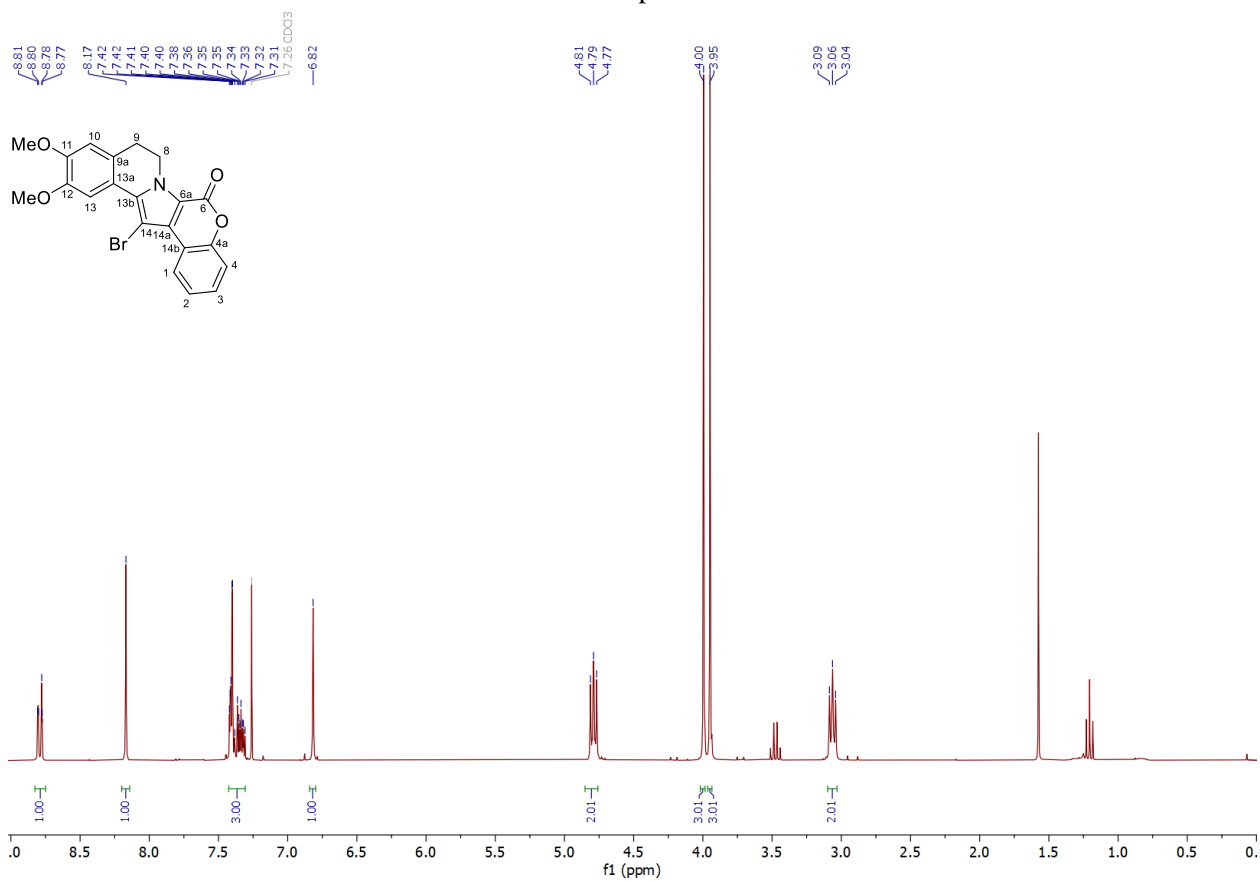

$^1\text{H}$  NMR (300 MHz,  $\text{CDCl}_3$ ) spectrum of **15b**

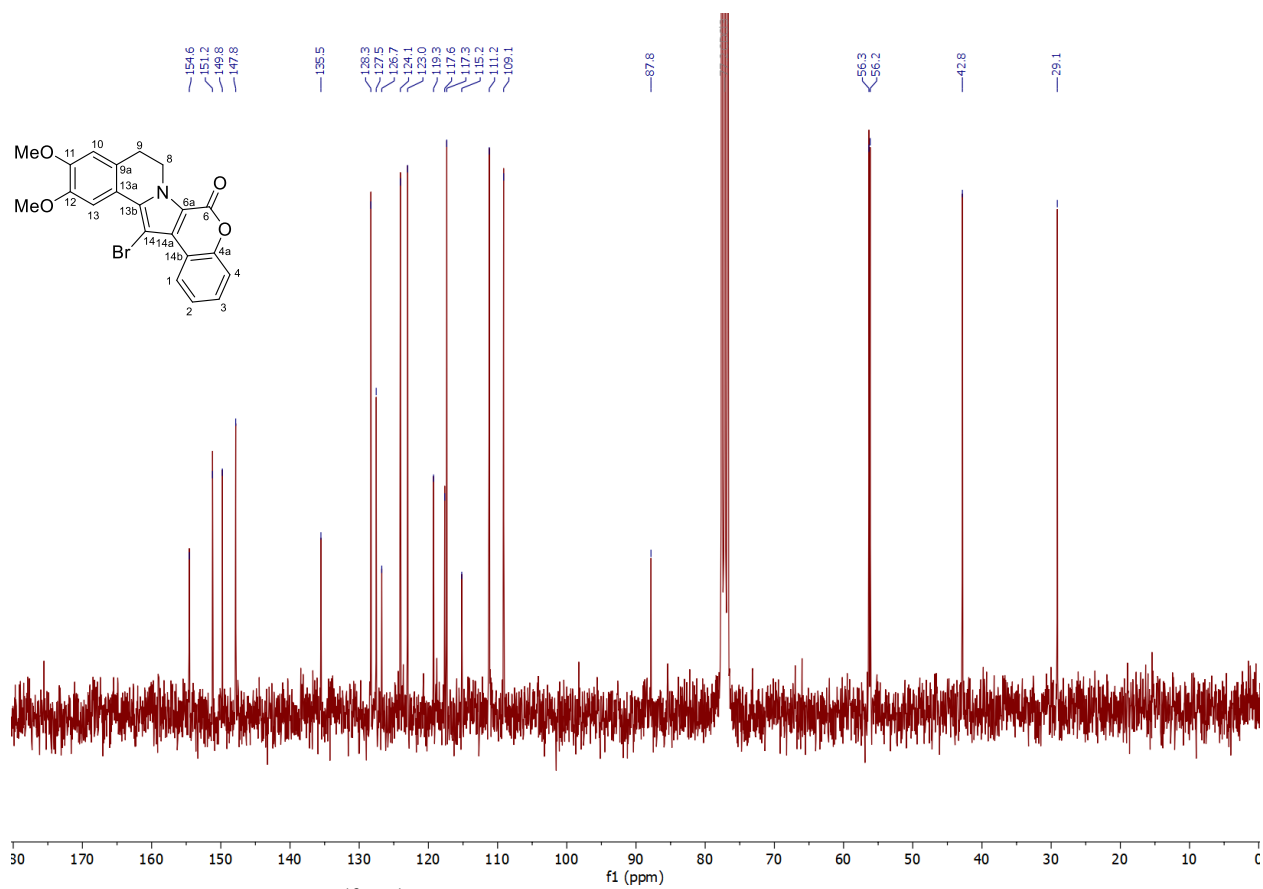

$^{13}\text{C}\{^1\text{H}\}$  NMR (75 MHz,  $\text{CDCl}_3$ ) spectrum of **15b**

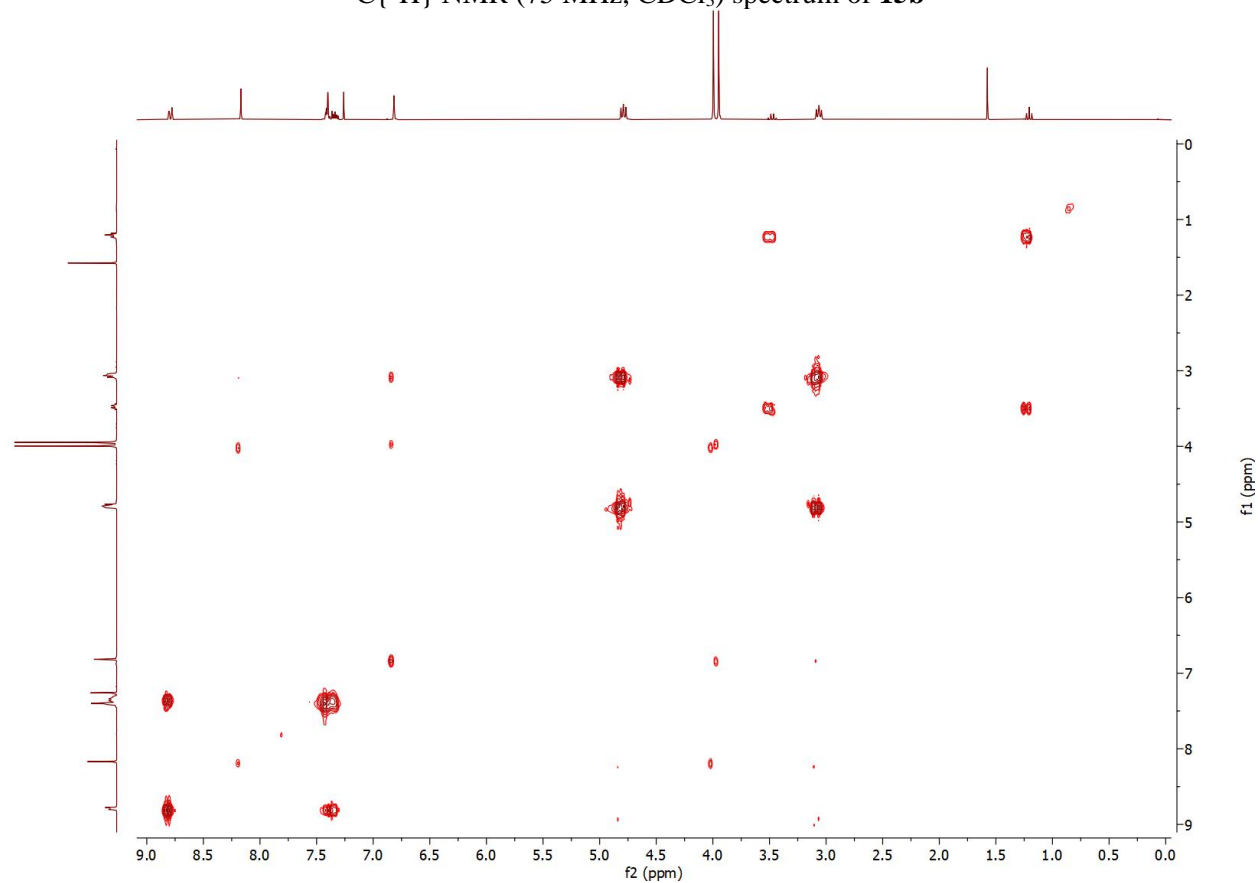

$^1\text{H}$ - $^1\text{H}$  COSY spectrum of **15b**

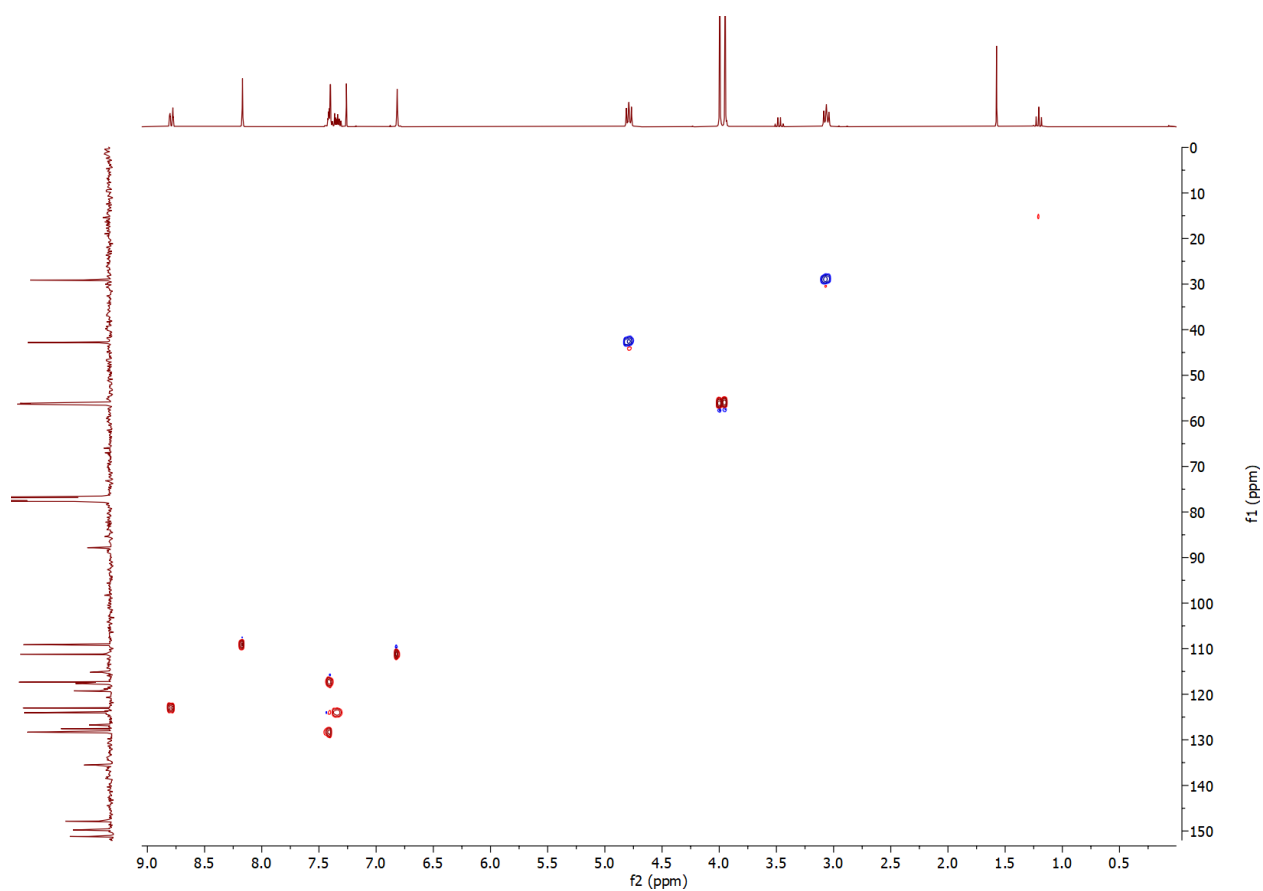

$^1\text{H}$ - $^{13}\text{C}$  HSQC spectrum of **15b**



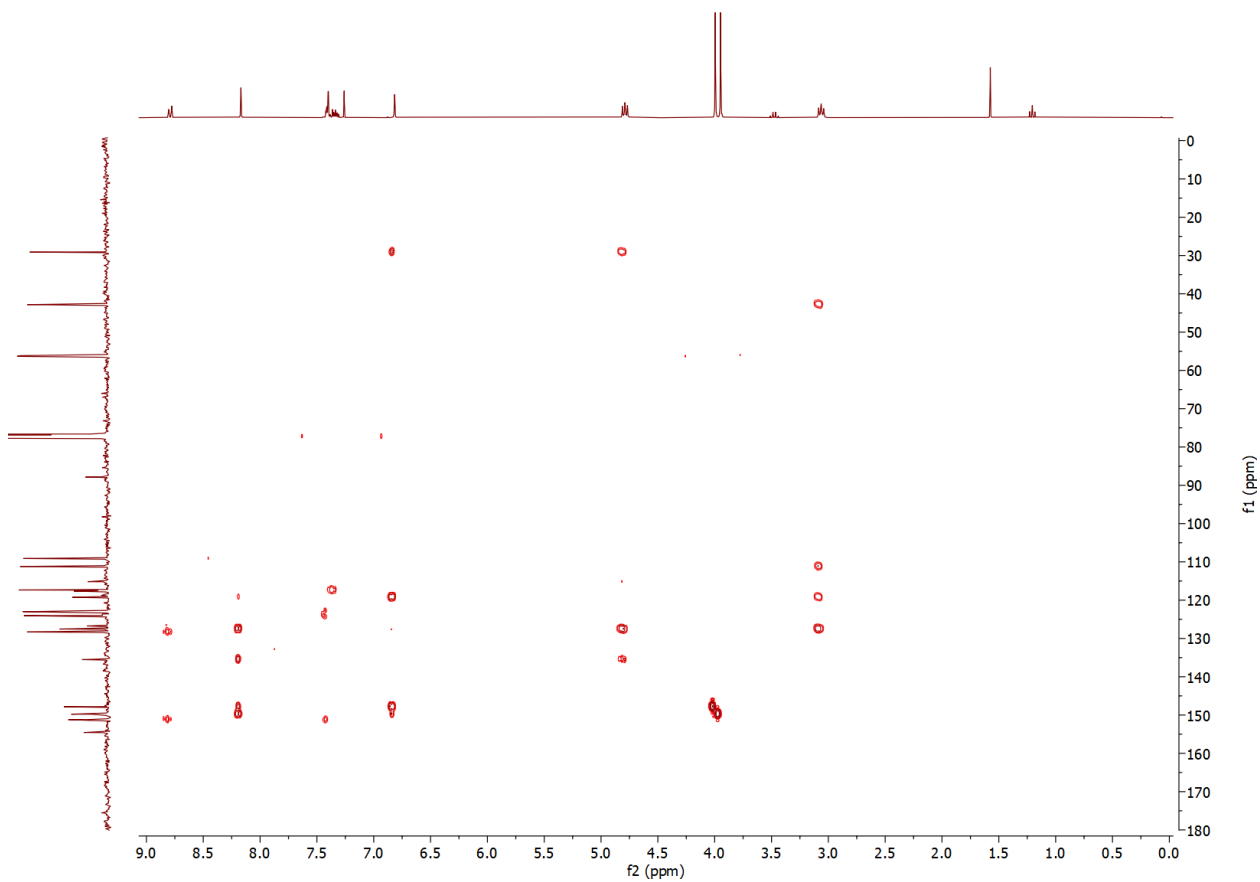

$^1\text{H}$ - $^{13}\text{C}$  HMBC spectrum of **15b**

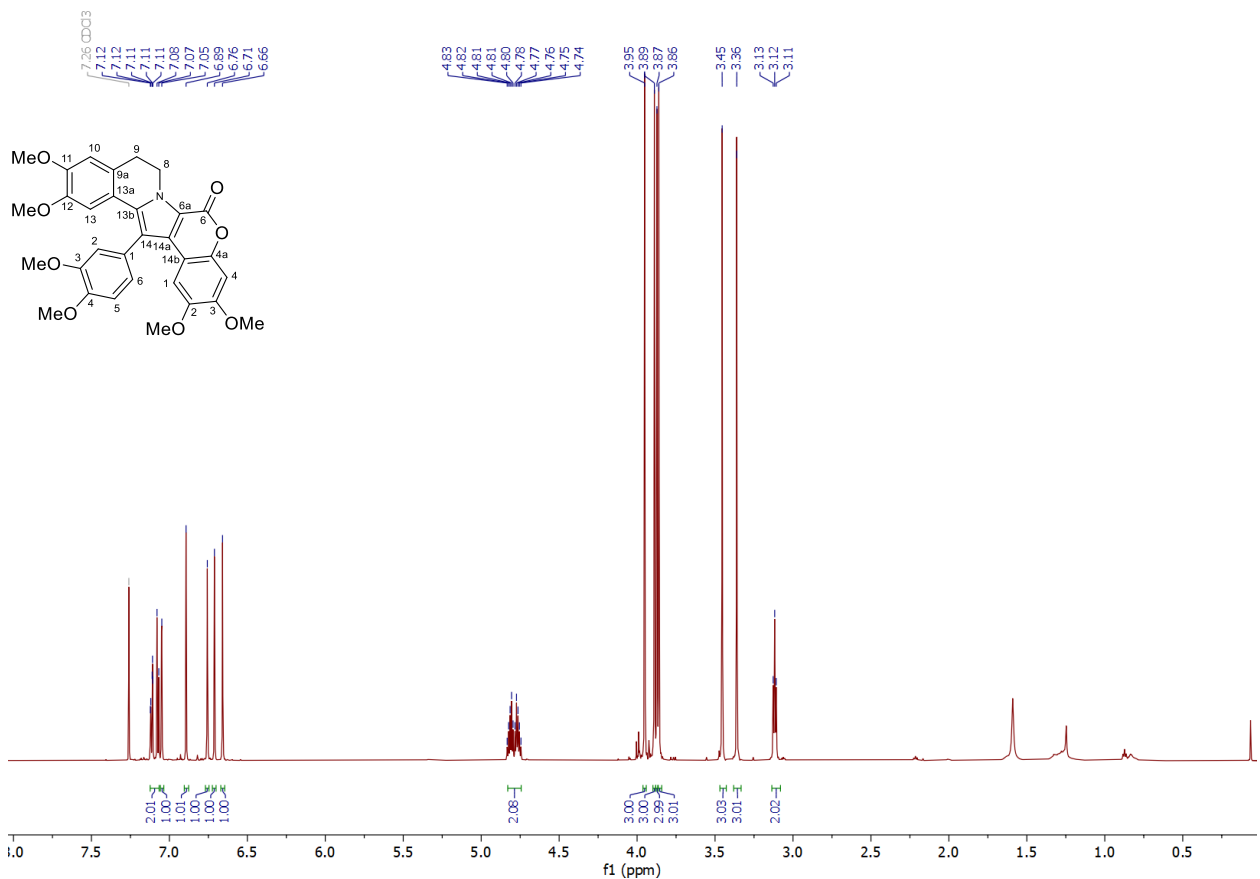

$^1\text{H}$  NMR (700 MHz,  $\text{CDCl}_3$ ) spectrum of **16a**

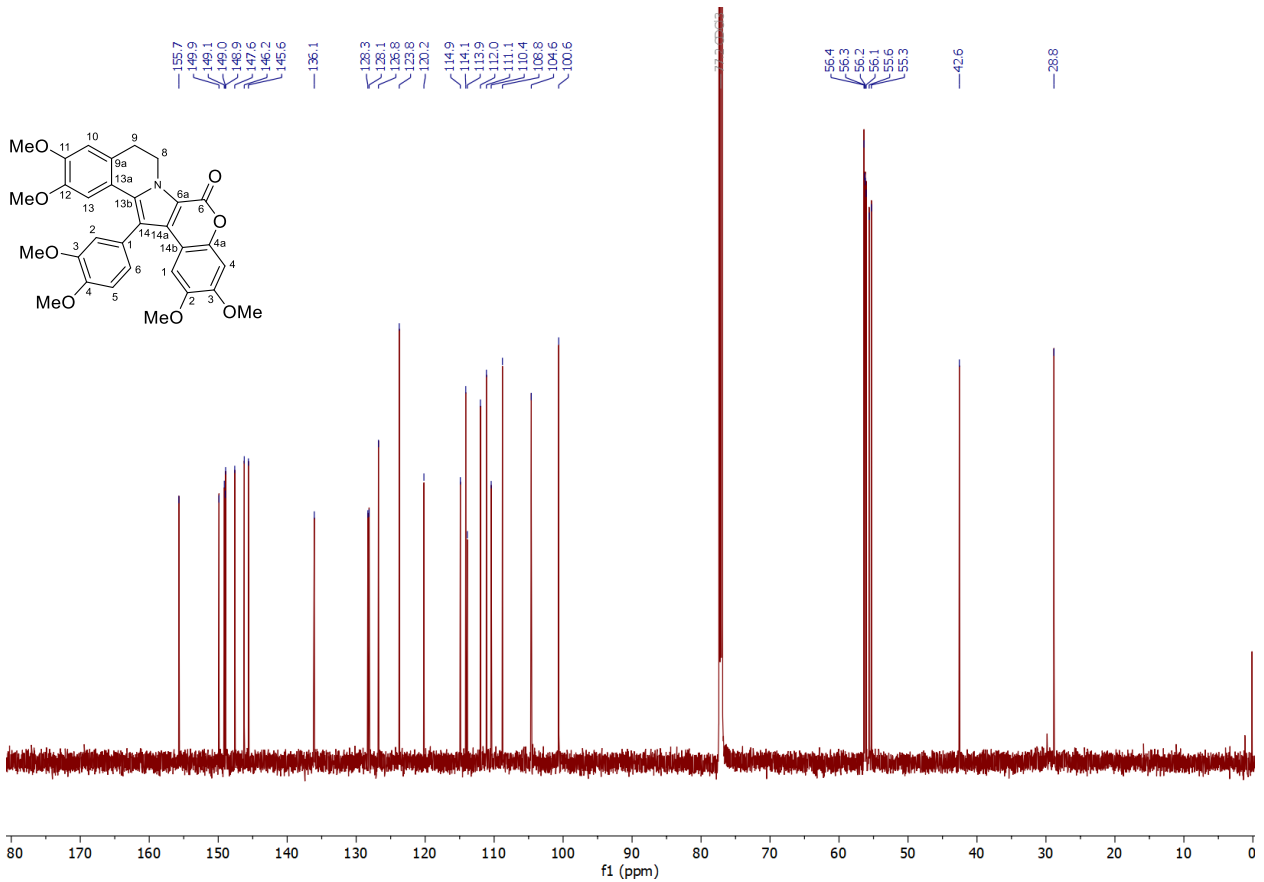

$^{13}\text{C}\{^1\text{H}\}$  NMR (176 MHz,  $\text{CDCl}_3$ ) spectrum of **16a**

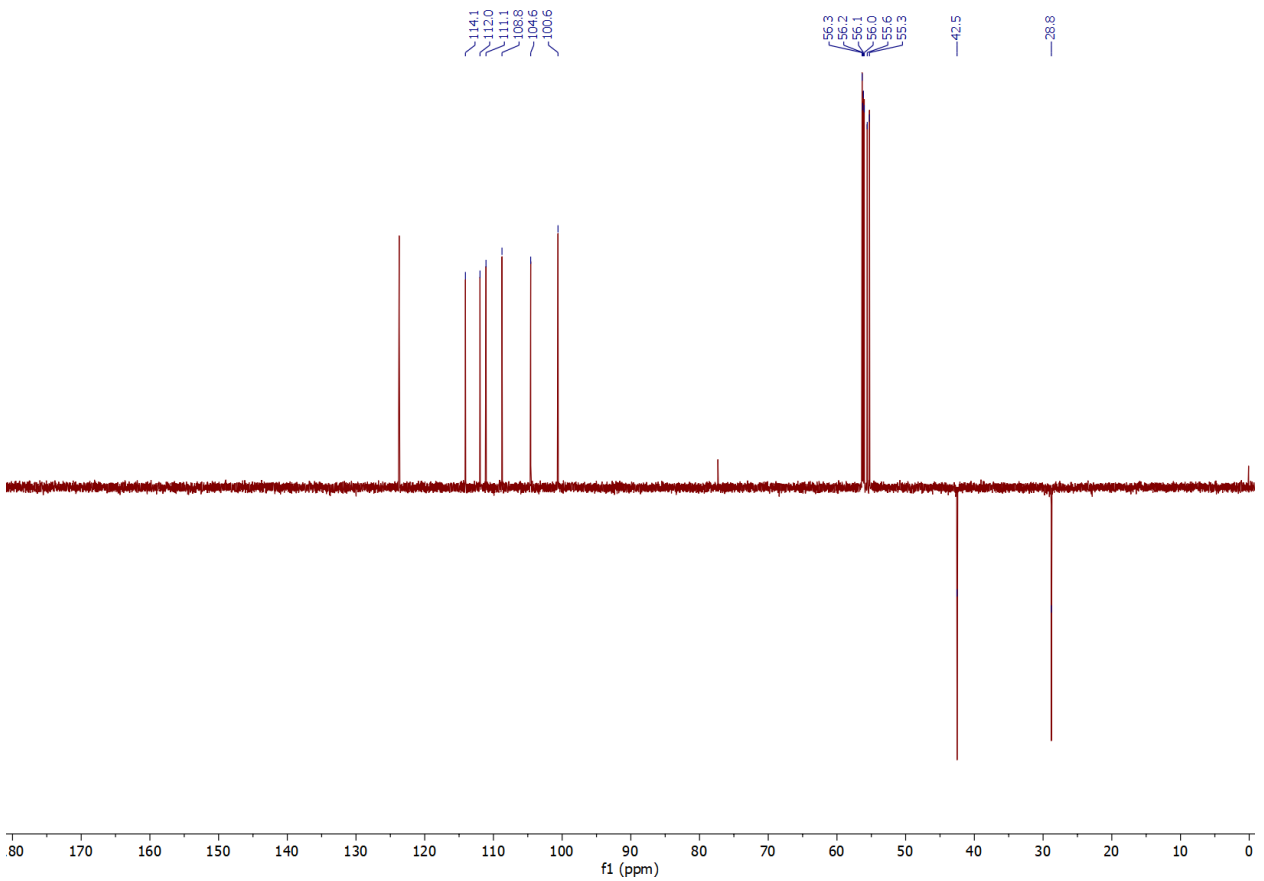

DEPT 135 spectrum of **16a**

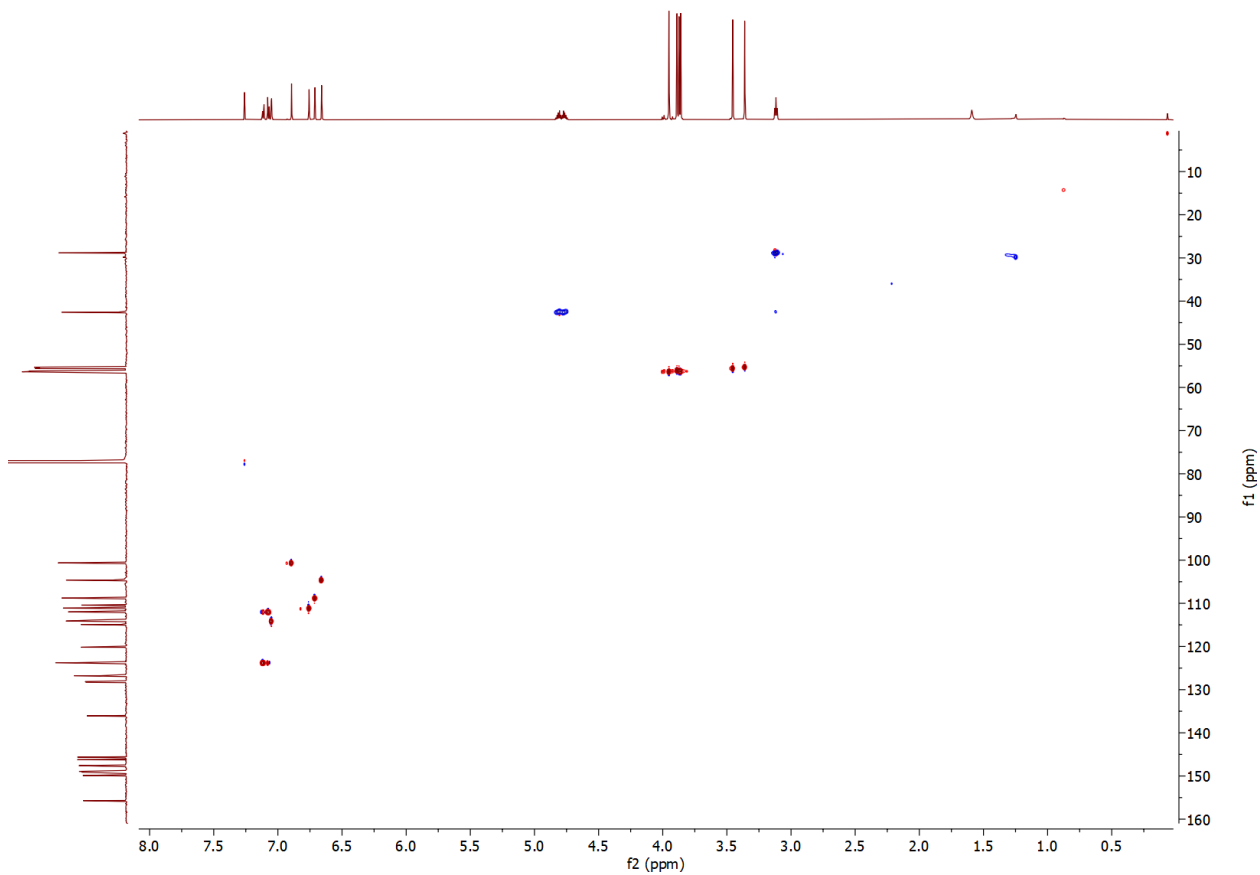

$^1\text{H}$ - $^{13}\text{C}$  HSQC spectrum of **16a**

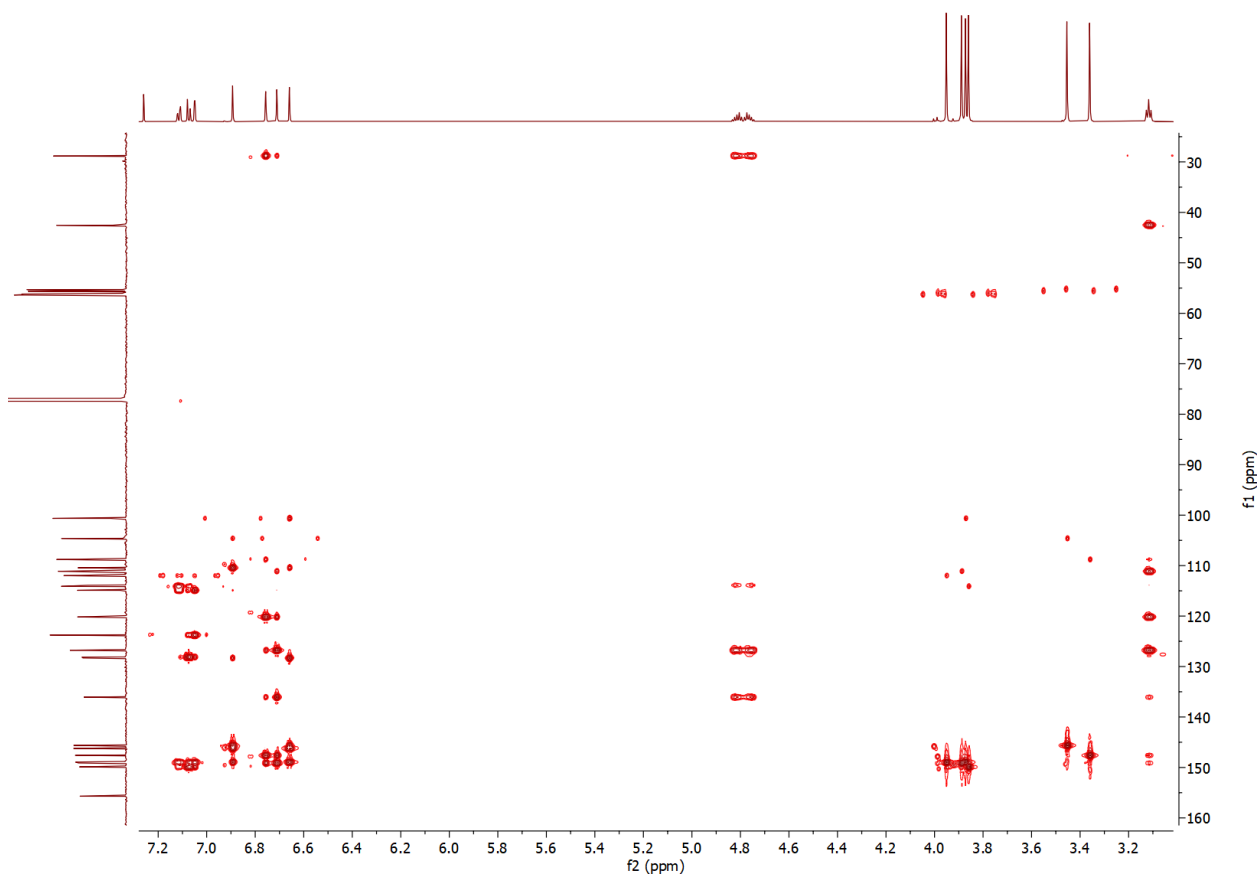

$^1\text{H}$ - $^{13}\text{C}$  HMBC spectrum of **16a**

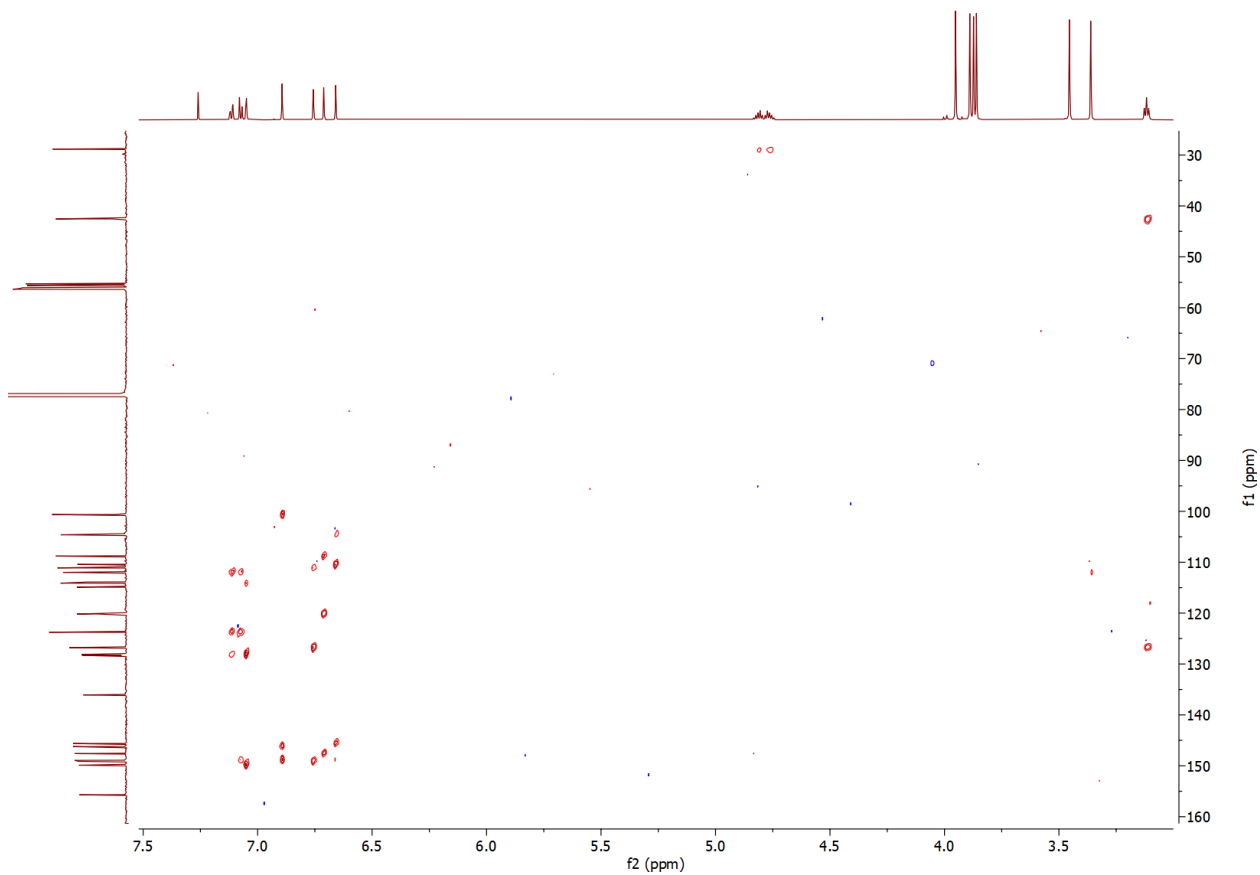

1,1-ADEQUATE spectrum of **16a**

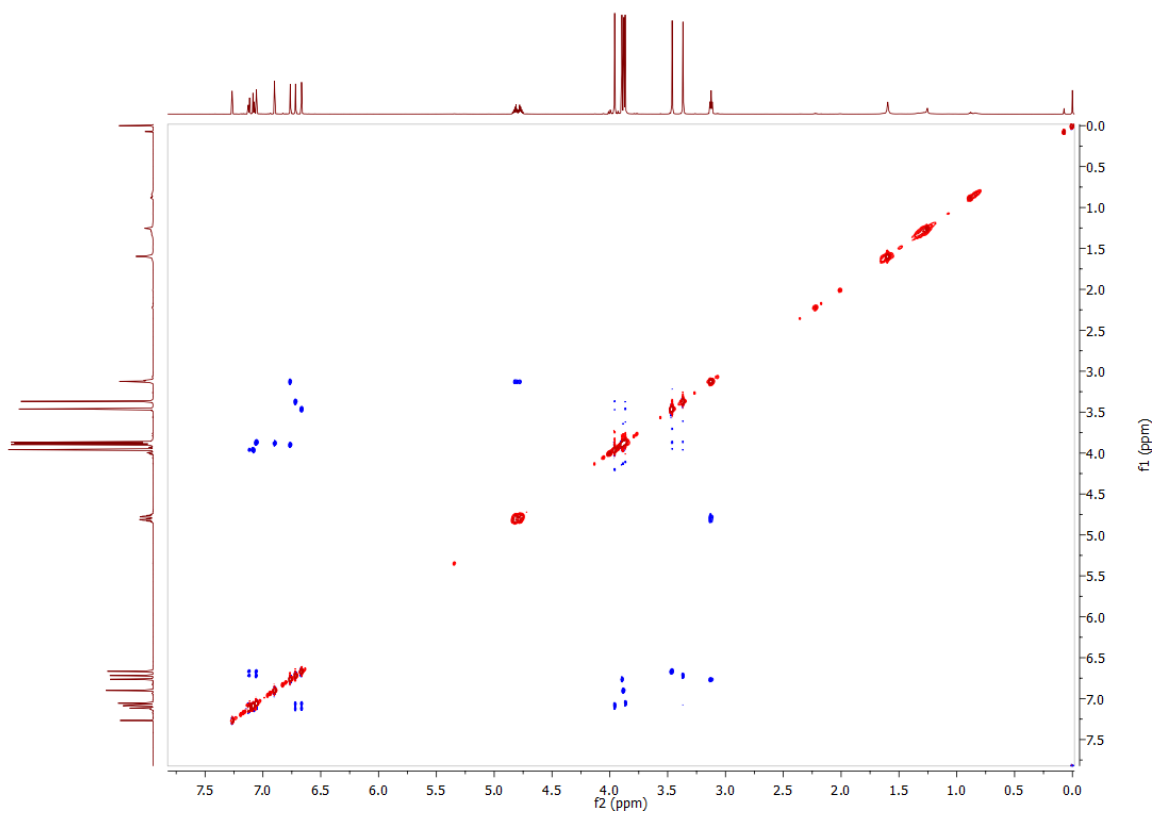

$^1\text{H}$ - $^1\text{H}$  NOESY spectrum of **16a**

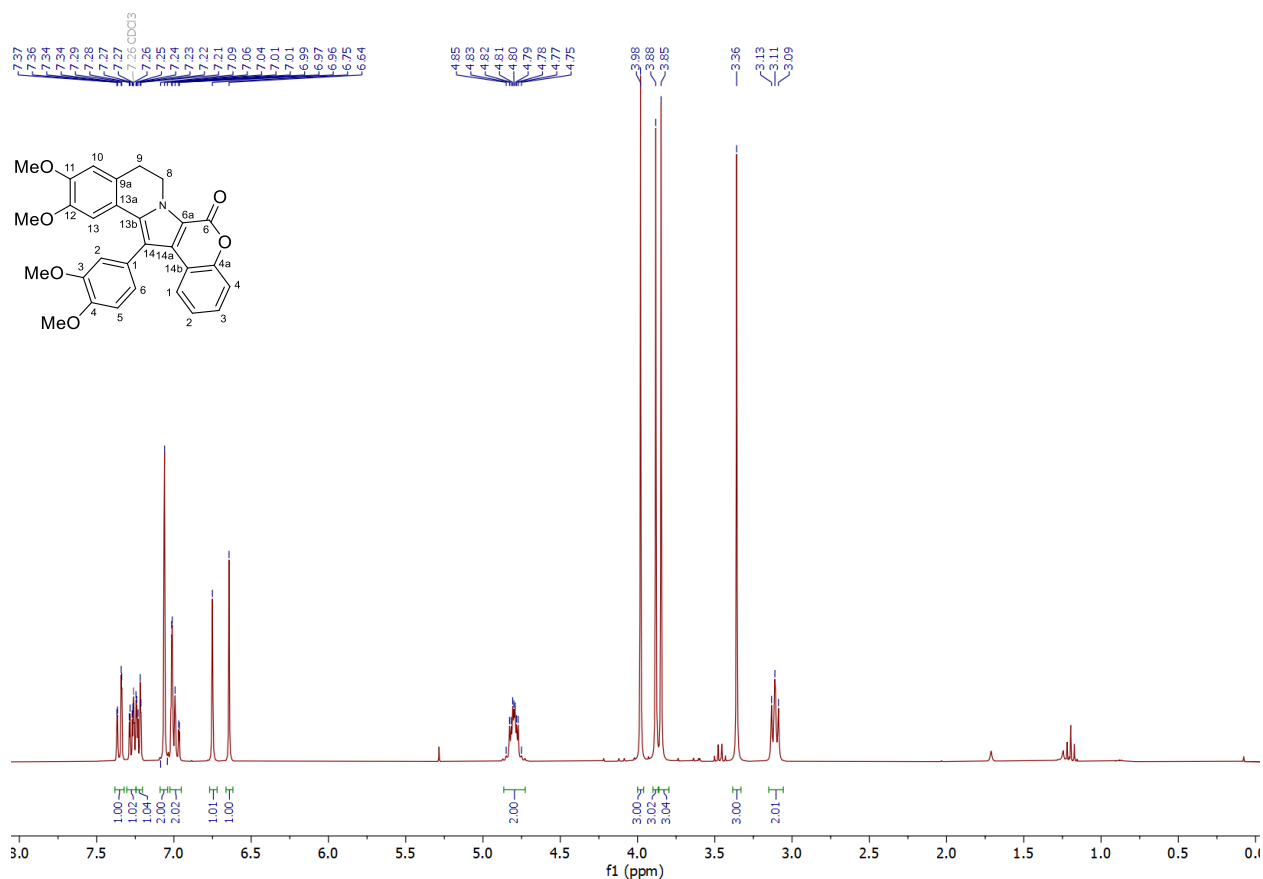

<sup>1</sup>H NMR (300 MHz, CDCl<sub>3</sub>) spectrum of **16b**

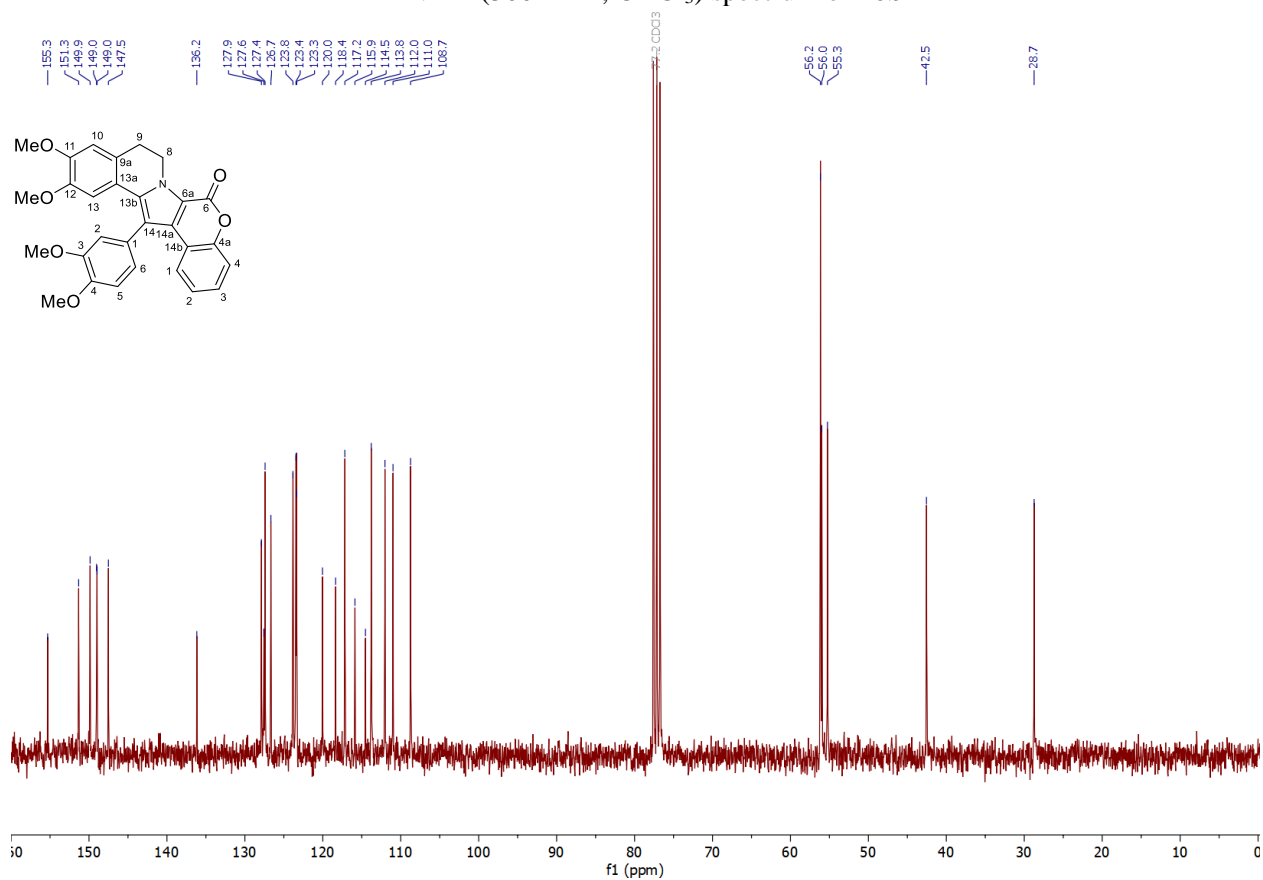

<sup>13</sup>C {<sup>1</sup>H} NMR (75 MHz, CDCl<sub>3</sub>) spectrum of **16b**

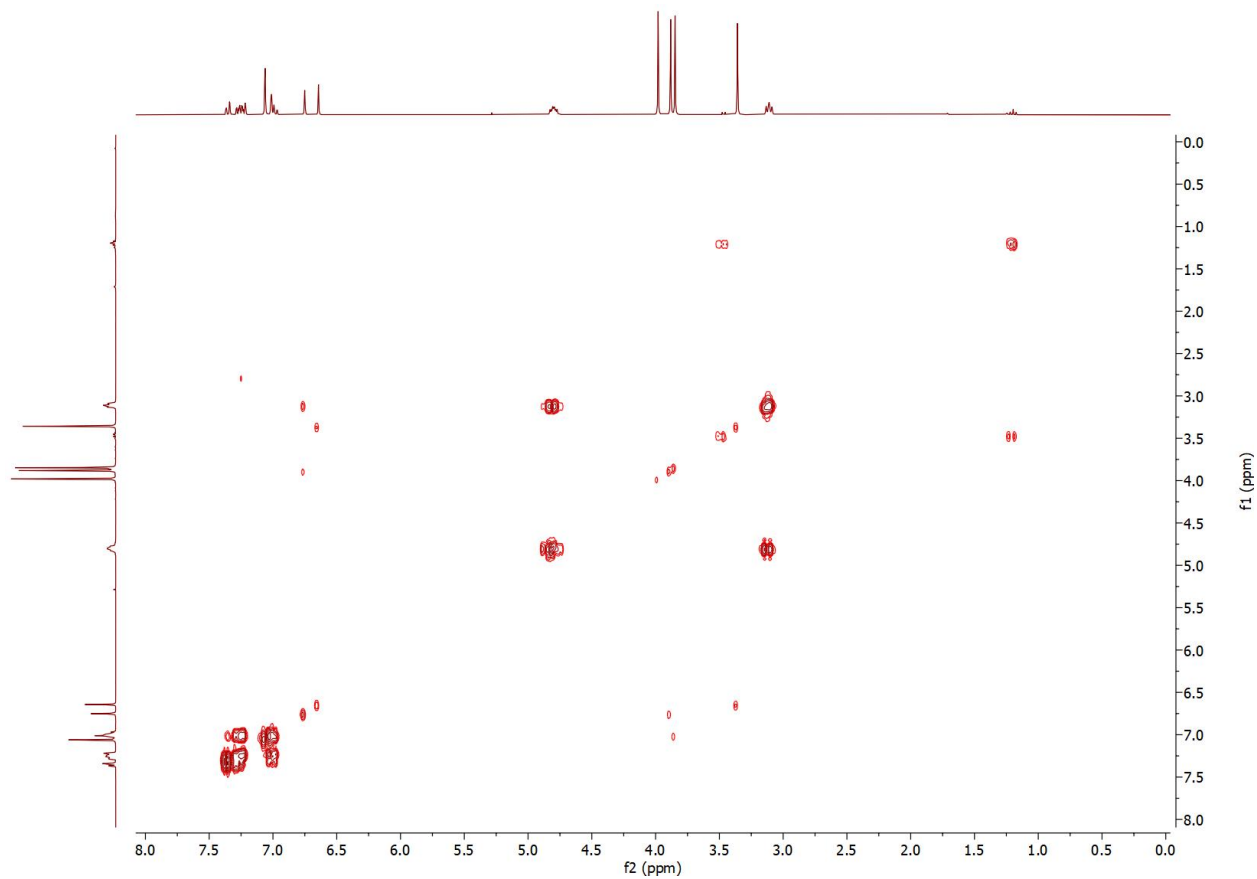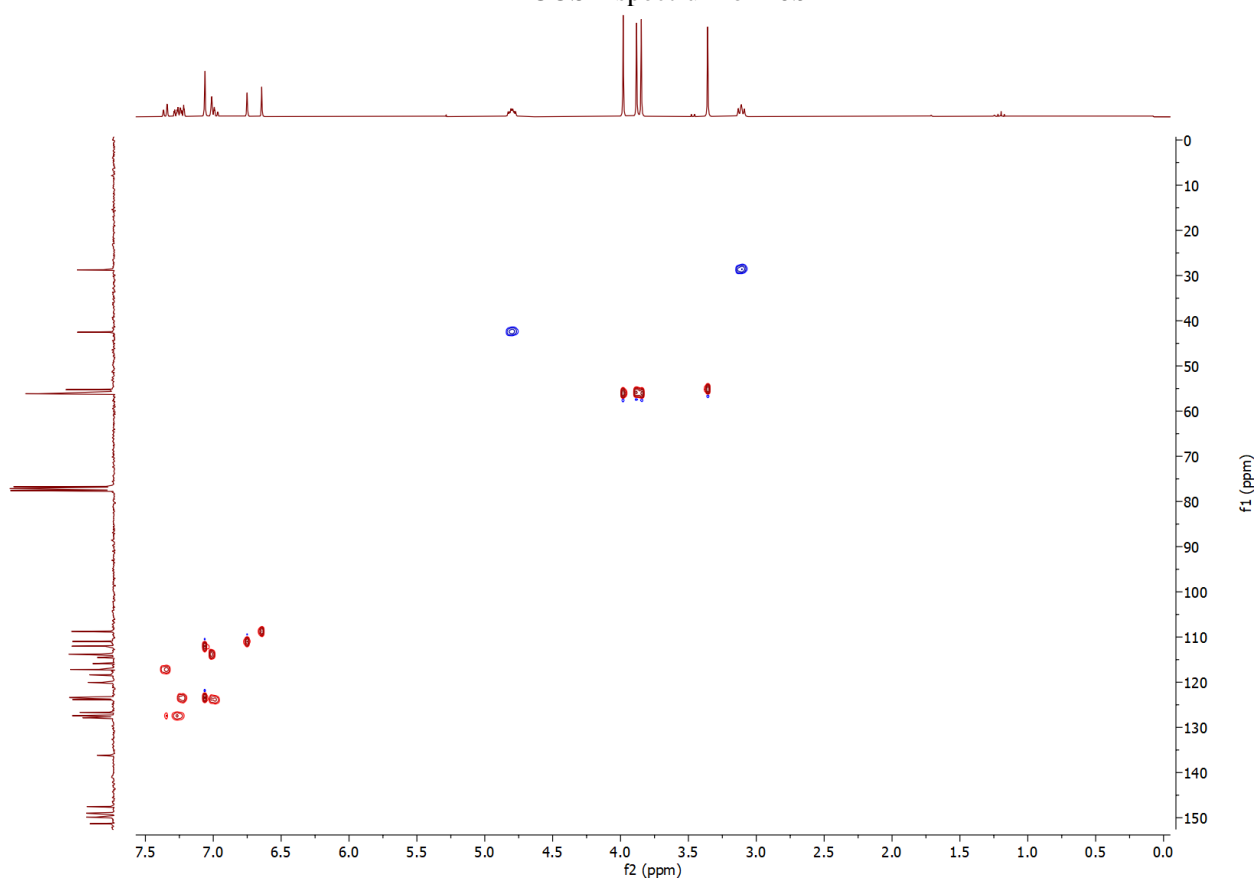

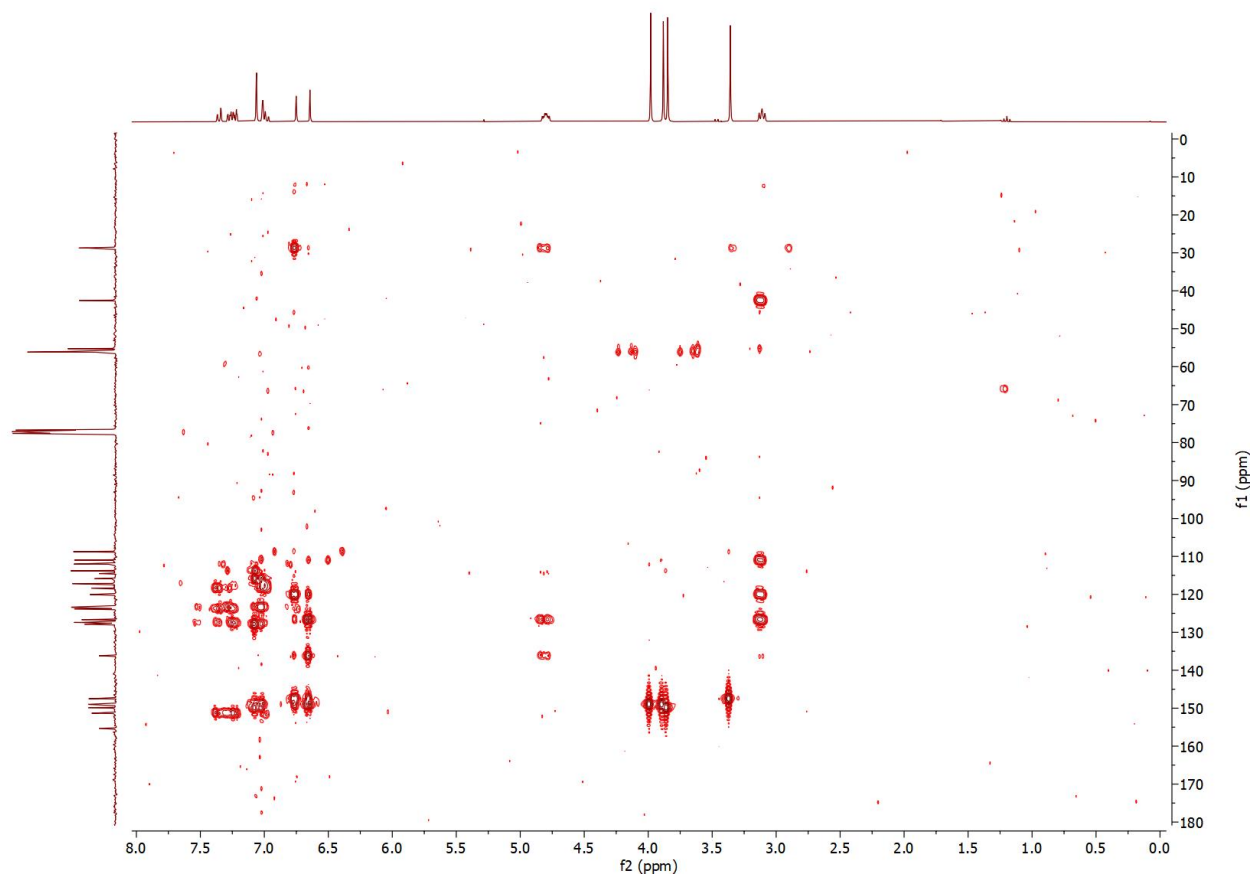

$^1\text{H}$ - $^{13}\text{C}$  HMBC spectrum of **16b**
